# Supplementary material for: Shared Gene Expression and Immune Pathway Changes Associated with Progression from Nevi to Melanoma
Source: Cancers (Basel). 2021 Dec 21;14(1):3. doi: 10.3390/cancers14010003 (PMC8749980; doi:10.3390/cancers14010003)
Supplement: Supplementary file 1 [file cancers-14-00003-s001.zip]

Archive with 10 entries (10 files):
- supplementary figures.pdf
- Supplementary_TableS1_Krueger_DEGs.xlsx
- Supplementary_TableS2_Scatolini_DEGs.xlsx
- Supplementary_TableS3_Bastian_DEGs.xlsx
- Supplementary_TableS4_Krueger_multinomial.xlsx
- Supplementary_TableS5_Scatolini_multinomial.xlsx
- Supplementary_TableS6_Krueger_binomial.xlsx
- Supplementary_TableS7_Scatolini_binomial.xlsx
- Supplementary_TableS8_Bastian_binomial.xlsx
- Supplementary_TableS9_All_genes_pathway_analysis.xlsx
