# Supplementary material for: Shared Gene Expression and Immune Pathway Changes Associated with Progression from Nevi to Melanoma
Source: Cancers (Basel). 2021 Dec 21;14(1):3. doi: 10.3390/cancers14010003 (PMC8749980; doi:10.3390/cancers14010003)
Supplement: Supplementary file 1 [file cancers-14-00003-s001.zip › Supplementary_TableS1_Krueger_DEGs.xlsx]

## Sheet: TableS1_Krueger_DEGs
Gene	CMM-DN log2FC	CMM-BN log2FC	DN-BN log2FC	AveExpr	F	P.Value	adj.P.Val
C1QA	1.80112	2.549	0.747881	7.81305	44.4223	4.53e-10	4.98e-06
AS3MT	-1.64203	-1.61535	0.0266755	5.40015	43.4002	5.98e-10	4.98e-06
DFNA5	1.57514	2.40408	0.828949	7.43257	36.7174	4.19e-09	1.39e-05
CYP39A1	-1.22533	-1.70876	-0.483439	6.83958	34.5985	8.17e-09	1.89e-05
CCL3L3	2.04223	2.36141	0.319177	5.20096	33.77	1.07e-08	1.89e-05
WIPI1	0.92867	2.01975	1.09108	8.54043	33.032	1.36e-08	1.89e-05
IGFBP4	0.799224	1.52075	0.721522	8.37467	32.2666	1.76e-08	2.14e-05
CCL8	2.41035	2.99069	0.580343	6.84866	29.4678	4.66e-08	3.88e-05
CPXM1	0.694844	2.13835	1.44351	6.74056	29.0484	5.42e-08	4.3e-05
C3AR1	1.03691	1.62955	0.592639	7.49604	26.8887	1.21e-07	6.48e-05
PTN	-1.32471	-2.30583	-0.981116	7.70969	26.7459	1.27e-07	6.6e-05
HS3ST2	1.25177	2.31765	1.06588	6.71847	26.6762	1.31e-07	6.6e-05
VMP1	1.65792	1.88555	0.227626	8.15816	26.174	1.59e-07	7.54e-05
CCR1	1.50257	1.90289	0.400314	6.40221	25.4801	2.08e-07	8.23e-05
MTCL1	0.879575	1.80933	0.929751	6.79227	24.9345	2.58e-07	9.7e-05
CCL4	1.48777	1.79672	0.308946	5.92567	24.4848	3.08e-07	0.000104738
CTHRC1	0.868886	2.2008	1.33192	10.9083	24.1603	3.51e-07	0.000109737
C1QC	1.29914	2.2886	0.98946	7.59414	23.9984	3.75e-07	0.000109737
IRF1	0.870855	1.50683	0.635974	7.56509	23.8584	3.97e-07	0.000109737
FCGR1B	1.89052	1.70209	-0.188431	5.26566	22.8113	6.12e-07	0.000143491
THEMIS2	0.970412	1.54985	0.579434	6.49721	22.4575	7.11e-07	0.000155661
CD14	1.13311	1.87391	0.740801	9.4554	22.4028	7.27e-07	0.000156831
POU2F3	-1.67274	-1.52511	0.147626	5.73363	22.3784	7.35e-07	0.000156831
BST2	1.34123	1.56658	0.225342	8.43531	22.2112	7.89e-07	0.000164157
GRIA1	-1.05501	-1.75284	-0.697831	4.31199	21.6349	1.01e-06	0.00018888
FCGR1CP	1.31526	1.52817	0.212908	5.41184	20.8113	1.45e-06	0.000235094
C1QB	1.73985	2.38929	0.64944	7.69792	19.6287	2.46e-06	0.000326934
GZMK	1.55945	2.53264	0.973188	6.35767	19.2083	2.98e-06	0.000366647
TFAP2B	-1.59003	-1.80644	-0.216414	6.14024	19.182	3.02e-06	0.000366647
EOMES	1.25855	1.84681	0.588267	5.69963	17.7693	5.87e-06	0.000551936
CCL27	-2.4914	-2.11955	0.371857	8.50583	17.4083	6.99e-06	0.00063208
MS4A4A	0.667234	1.74151	1.07428	6.414	16.7376	9.71e-06	0.000788345
SCG2	1.62656	1.47325	-0.153314	4.6968	16.4137	1.14e-05	0.000875396
HKDC1	-0.53945	-1.55539	-1.01594	5.0054	16.2638	1.23e-05	0.000913511
HCLS1	1.1148	1.67689	0.562093	8.63251	16.0659	1.36e-05	0.000974998
SASH3	0.844302	1.59135	0.747052	6.24974	15.7966	1.56e-05	0.00106926
MIR3671	-0.535671	-1.55654	-1.02087	5.79894	15.7936	1.56e-05	0.00106926
GATA3	-1.67121	-1.48901	0.182204	8.55544	15.3775	1.93e-05	0.00124161
TNFSF13B	1.03804	1.61317	0.575132	7.47258	15.3336	1.98e-05	0.0012604
CLDN8	-1.62488	-2.11331	-0.488434	6.91061	15.1451	2.18e-05	0.00132397
LY96	1.15538	1.56396	0.40858	7.54542	14.759	2.67e-05	0.0014802
EPSTI1	1.18476	1.75704	0.572277	6.73003	14.7425	2.69e-05	0.00148721
IFI30	0.930106	1.50951	0.579409	9.57443	14.7353	2.7e-05	0.00148721
LINC01158	-0.695671	-1.70528	-1.00961	6.20743	14.7194	2.72e-05	0.00148721
MICB	1.60287	1.26076	-0.342115	6.73099	14.7181	2.73e-05	0.00148721
S100A9	1.61897	3.79946	2.18049	8.06826	14.5686	2.95e-05	0.00156888
CH25H	1.09951	2.01484	0.915327	6.60192	14.5433	2.99e-05	0.0015806
NQO1	1.50614	1.42552	-0.0806154	7.88342	14.5263	3.02e-05	0.0015842
KRT77	-1.87401	-1.40393	0.470082	10.5047	14.4859	3.08e-05	0.00161099
LOC729732	-1.15456	-1.65373	-0.499172	5.86261	14.1376	3.71e-05	0.00179453
CDHR1	-1.06292	-1.53937	-0.476448	6.40256	13.7815	4.5e-05	0.00201985
CECR1	0.543487	1.60417	1.06068	9.01801	13.6587	4.81e-05	0.00209191
GZMA	1.47868	1.82903	0.350344	6.50365	13.3995	5.55e-05	0.00228616
EVI2A	0.710173	1.5629	0.852729	7.01752	13.3007	5.86e-05	0.00236747
CLCA4	-2.10809	-1.07697	1.03112	5.68776	13.2948	5.88e-05	0.00236942
CTGF	1.3665	1.69403	0.327532	8.4229	13.0775	6.63e-05	0.0025793
PPBP	-1.3688	-1.95958	-0.590786	4.38577	12.5396	8.97e-05	0.003042
PAMR1	-1.07568	-1.67006	-0.594379	8.37041	12.3238	0.000101441	0.0033246
CHP2	-1.88897	-1.52799	0.36098	8.73264	12.3065	0.000102451	0.00333797
DACT1	0.869355	1.53281	0.663455	6.52531	12.2615	0.000105122	0.00335925
PRAME	2.80282	2.97355	0.170728	6.05747	12.0029	0.000121988	0.0037472
COL24A1	-0.623631	-1.64673	-1.0231	4.16607	11.9651	0.000124683	0.00380481
MME	1.27998	1.8905	0.610516	6.22407	11.8397	0.000134093	0.00398663
IFI27	0.950561	1.91294	0.962383	10.1058	11.6451	0.00015021	0.00431924
LOC100505664	-1.08239	-1.62475	-0.542365	6.47221	11.6066	0.000153637	0.00437997
APOBEC3A_B	1.30442	1.71192	0.407504	4.40196	11.475	0.000165981	0.00452336
RSAD2	1.69849	1.26286	-0.43563	5.70267	11.3141	0.000182525	0.00483895
HS3ST6	-1.62304	-1.04697	0.576074	7.30653	11.3012	0.000183931	0.00486073
CD27	1.043	1.62449	0.581489	6.12262	11.1488	0.000201364	0.00514979
RNF182	1.70588	0.993823	-0.712055	5.28856	10.9125	0.000231952	0.00568727
CHL1	-1.12897	-1.87819	-0.749212	6.42283	10.9081	0.000232564	0.00568727
RNASE6	0.881594	1.595	0.713403	7.41111	10.4629	0.000304583	0.00675233
Mir155hg	1.13819	1.6388	0.50061	4.25691	10.2389	0.000349472	0.0074025
PI3	1.94754	3.08586	1.13832	6.84789	10.2116	0.000355384	0.00746442
SELL	1.52321	1.72885	0.205635	6.42333	10.0687	0.000388237	0.00785786
CHIT1	1.90737	2.37317	0.465799	5.58515	10.0345	0.00039655	0.00795441
CXCL9	2.89006	1.98278	-0.907284	7.67567	10.0181	0.000400621	0.00802641
GZMB	1.54685	1.64396	0.0971149	5.94298	9.26813	0.000642712	0.0106898
ADAMDEC1	1.7743	2.95559	1.18129	5.60487	9.02973	0.000749084	0.011799
CXCL10	2.37101	1.9154	-0.455604	6.65241	9.0188	0.000754387	0.0118489
HOTAIR	-1.49716	-1.61801	-0.120849	5.82002	8.98592	0.000770585	0.0120283
TNFAIP6	0.84162	1.71933	0.877707	6.68966	8.57576	0.00100676	0.0139947
LINC00518	2.43182	2.46178	0.0299622	5.36118	8.55915	0.00101782	0.0140744
PLA2G2A	1.22962	1.66668	0.43706	7.08876	8.51977	0.00104454	0.0143368
PTX3	1.54666	1.56426	0.0176055	6.731	8.44294	0.00109884	0.014817
GRHL3	-0.924096	0.67722	1.60132	7.04437	8.4091	0.0011237	0.0150148
CRISP3	-2.34632	0.507814	2.85413	6.13859	8.21532	0.00127803	0.0161441
IGFL1	1.28382	2.10023	0.816407	5.65894	8.20168	0.00128971	0.0162393
CP	0.470996	1.58513	1.11414	6.21347	7.96265	0.00151384	0.0179554
S100A12	1.51237	1.93983	0.42746	4.84125	7.84813	0.00163555	0.0188968
FCGR3B	1.16251	1.59113	0.428623	6.5564	7.70884	0.00179774	0.0200204
WISP2	0.232349	1.50213	1.26978	9.10183	7.39333	0.0022316	0.0229498
RNASE7	-1.16043	0.680289	1.84072	5.57688	7.05382	0.00282519	0.0268014
CITED1	1.52978	1.34505	-0.184732	5.75319	7.03326	0.00286614	0.0270491
SPP1	1.15055	1.78622	0.635673	4.9125	6.95685	0.00302395	0.0281261
SERPINB4	1.24576	3.86135	2.61559	5.58389	6.623	0.00382982	0.0328166
LHFPL3	-1.92371	-2.43404	-0.510332	5.1047	6.42774	0.00440433	0.0358221
MMP1	1.67782	3.24636	1.56854	5.26982	6.41767	0.00443633	0.0359302
IVL	-0.011532	1.91306	1.9246	9.63528	6.13543	0.00544164	0.0409204
UBD	1.5259	1.63959	0.113686	7.2282	6.11194	0.00553555	0.0414395
S100A8	0.579614	2.27651	1.6969	8.2166	5.88161	0.00655319	0.0461523
MIR8071-1	1.14535	2.32144	1.17609	7.02062	5.85246	0.00669548	0.0467588
MAGEA3	2.74373	2.76715	0.0234228	4.94162	5.81651	0.00687552	0.0475771
