# Supplementary material for: Shared Gene Expression and Immune Pathway Changes Associated with Progression from Nevi to Melanoma
Source: Cancers (Basel). 2021 Dec 21;14(1):3. doi: 10.3390/cancers14010003 (PMC8749980; doi:10.3390/cancers14010003)
Supplement: Supplementary file 1 [file cancers-14-00003-s001.zip › Supplementary_TableS2_Scatolini_DEGs.xlsx]

## Sheet: TableS2_Scatolini_DEGs
Gene	VGM-RGM log2FC	VGM-DN log2FC	VGM-BN log2FC	AveExpr	F	P.Value	adj.P.Val
LRP4	-1.33692	-1.38419	-1.77004	0.646158	20.2177	6.97e-09	3.72e-05
DFNA5	1.8804	1.61279	2.13444	-1.60371	18.9297	1.72e-08	4.13e-05
CYP4B1	-1.34139	-1.91429	-2.00322	-2.1081	18.8748	1.79e-08	4.13e-05
STAR	-1.33648	-1.49117	-1.58178	-2.49229	18.6345	2.13e-08	4.13e-05
FCGR3A	1.2812	1.85732	2.22176	-1.32169	18.515	2.32e-08	4.13e-05
ARMC9	0.641628	1.52511	1.51391	-0.337571	18.1051	3.13e-08	4.55e-05
HLF	-1.1287	-1.44462	-1.50223	-0.296661	17.8225	3.85e-08	5.13e-05
FCGR1B	1.43651	2.38756	2.34567	-1.0044	17.5247	4.79e-08	5.42e-05
EMX2OS	-1.5497	-1.61597	-1.5214	-1.52647	17.4513	5.06e-08	5.42e-05
CTNNBIP1	-1.77868	-1.15164	-1.63133	1.03347	17.438	5.11e-08	5.42e-05
FCGR2A	1.13002	1.43816	1.64882	0.423449	16.8995	7.65e-08	7.21e-05
C1QB	1.29466	1.61436	1.83539	-0.501017	16.5557	9.94e-08	7.95e-05
CCDC3	-1.6531	-1.7708	-1.81765	1.3277	16.4188	1.1e-07	8.41e-05
PDZD2	-0.95368	-2.11317	-1.75833	-0.487625	16.3531	1.16e-07	8.44e-05
KRT15	-1.5667	-1.71102	-1.71022	3.07759	15.0583	3.19e-07	0.000150138
GATM	-0.844026	-1.87557	-2.12441	-2.23584	14.9111	3.59e-07	0.00015514
CHP2	-1.66726	-1.83152	-2.18351	2.70664	14.6931	4.27e-07	0.000171664
RGS1	1.84954	2.85484	3.17967	0.573873	14.2296	6.22e-07	0.000209822
PSMA4	1.37782	0.841493	1.50085	0.14896	14.1591	6.59e-07	0.000210812
IL20RA	-1.36459	-1.66277	-1.62525	1.81459	13.3446	1.29e-06	0.000333493
AR	-1.81309	-2.16084	-1.54731	-0.930021	13.2317	1.42e-06	0.000349737
CCL27	-1.25049	-1.6569	-1.65932	2.70503	13.005	1.72e-06	0.000376968
ATP13A5	-1.23608	-2.25013	-1.7708	1.52756	12.9184	1.85e-06	0.000394376
CCL18	1.87244	1.10646	2.64262	0.77907	12.9047	1.87e-06	0.000394376
FTL	1.03156	1.10839	1.66617	-0.0193569	12.9042	1.87e-06	0.000394376
WNT3	-2.13944	-2.45694	-1.70687	1.7569	12.8685	1.93e-06	0.000395833
LCP2	0.587461	1.28585	1.59477	0.632595	12.8518	1.96e-06	0.000395833
MICALCL	-1.93196	-1.76386	-1.67491	2.22869	12.6584	2.31e-06	0.000445246
IFI44	0.873886	1.22184	1.66498	1.8397	12.6377	2.35e-06	0.000447805
TSPAN5	-1.57155	-1.59646	-1.71382	0.22237	12.4834	2.68e-06	0.000493548
MS4A4A	1.43936	1.25002	1.9461	0.180892	11.9499	4.26e-06	0.000637338
GABRE	-1.88767	-1.93091	-1.66463	1.46335	11.9014	4.45e-06	0.000658844
CTHRC1	1.47697	1.64209	1.88042	1.98007	11.7822	4.94e-06	0.000686667
CXCL10	1.4349	1.71049	2.57677	1.02569	11.679	5.41e-06	0.000702976
CYP3A4	-1.57843	-1.36312	-1.31346	1.43562	11.622	5.68e-06	0.000710748
TIMP1	1.07528	1.43622	1.569	0.493263	11.5591	6.01e-06	0.000726945
IFI30	0.677912	1.34462	1.53053	-0.254533	11.5209	6.22e-06	0.000736936
PIK3C2G	-0.921491	-1.86939	-1.18525	1.44855	11.4784	6.46e-06	0.000759621
FCGBP	-1.37109	-2.04389	-1.64686	1.91977	11.4203	6.8e-06	0.000769784
GAREM1	-1.2601	-1.68043	-1.13108	0.291558	11.2039	8.25e-06	0.000881194
CXCL8	2.02706	2.60377	3.08375	-3.07728	11.1606	8.57e-06	0.00090847
GDF15	0.839254	1.96478	2.5991	-1.54336	11.099	9.06e-06	0.000950141
C1QA	1.16509	1.25605	1.66999	-0.0686355	10.9357	1.05e-05	0.00104964
SERPINE2	2.31443	1.43058	1.35431	0.674843	10.8723	1.11e-05	0.00108298
ALDH3A2	-0.646917	-2.02965	-1.53131	1.596	10.8666	1.12e-05	0.00108298
NTF4	-0.787284	-1.68464	-1.53013	1.16523	10.7997	1.19e-05	0.00113068
SAMSN1	1.76374	1.4095	1.89998	0.860173	10.7753	1.21e-05	0.00114914
S100A9	1.2045	2.5205	2.96429	1.28916	10.6954	1.3e-05	0.00118067
NMU	-1.60555	-1.31049	-1.77459	3.04518	10.5191	1.53e-05	0.00127755
MAD2L1	1.39734	1.3939	1.58857	-0.534757	10.4649	1.61e-05	0.00131521
BIRC2	1.90821	0.574363	1.26418	0.05822	10.2161	2.03e-05	0.00150075
ELMOD1	-1.55427	-1.69287	-1.63593	0.727618	10.169	2.12e-05	0.00151953
BCL6	-0.183325	-1.57632	-1.06466	0.307526	10.0655	2.33e-05	0.00160655
FAAH2	-1.39737	-1.6293	-1.52412	1.63284	9.96834	2.55e-05	0.00169295
GRHL2	-0.773817	-1.74461	-1.55523	1.65395	9.88465	2.76e-05	0.00176461
SGK1	1.70028	0.718158	1.26445	0.120642	9.738	3.16e-05	0.00189564
TMEM154	-1.0542	-1.22074	-1.50465	4.0844	9.65428	3.42e-05	0.00198409
KRT23	-1.6137	-1.31148	-1.55843	2.69703	9.55418	3.76e-05	0.00206113
TNFRSF25	-1.9353	-1.59354	-1.518	1.03805	9.493	3.98e-05	0.00212571
SPP1	1.97193	2.20989	2.05854	-2.42116	9.4342	4.21e-05	0.00218211
MNDA	0.499205	0.574665	1.5192	1.37919	9.12218	5.67e-05	0.00274325
SAMHD1	1.52479	0.524643	1.59814	-0.483995	8.97861	6.51e-05	0.00293137
KRT13	-0.802024	-1.97773	-0.814972	1.25989	8.97452	6.54e-05	0.00293137
NPY1R	-1.13503	-1.71086	-1.71837	-0.574297	8.88629	7.12e-05	0.0030632
SLC2A1	-1.61646	-0.965145	-0.98901	2.27781	8.81035	7.66e-05	0.00320214
GBP5	0.336016	1.5871	1.78383	1.38655	8.66265	8.85e-05	0.0034868
OPN3	1.57221	0.673524	1.20433	0.0977538	8.62973	9.13e-05	0.00350549
RORA	-1.31087	-1.52651	-1.15506	2.32098	8.47937	0.000105806	0.0038395
FDCSP	1.10434	2.30815	1.98244	-0.148736	8.42817	0.000111256	0.00392614
EXPH5	-1.16241	-1.64814	-1.02887	1.70362	8.41427	0.000112785	0.00394531
SCEL	-1.18731	-1.41914	-1.69228	4.3091	8.34774	0.000120409	0.00410142
CDH19	1.93482	1.94554	1.65054	2.13423	8.34558	0.000120666	0.00410142
CD53	0.956716	1.03847	1.642	0.56656	8.29949	0.000126271	0.00420781
SULT1E1	-1.79298	-1.10174	-1.37512	2.20733	8.27418	0.000129463	0.00426296
CORIN	-0.578602	-1.6716	-0.641802	0.932382	8.15264	0.000145997	0.0045722
CXCL1	1.10746	1.30777	1.91675	-0.787608	7.97254	0.00017462	0.00515579
DACT2	-1.60083	-1.78164	-1.4149	0.463618	7.90959	0.000185944	0.00531368
LOC100128164	-0.650643	-1.5439	-0.992176	-1.79865	7.87341	0.000192794	0.00544141
RAPGEFL1	-0.916001	-1.94174	-1.16496	1.55452	7.78205	0.000211277	0.00574034
HS3ST2	1.44889	1.18758	1.73606	-0.445476	7.75491	0.000217113	0.00585913
TMPRSS11F	-1.08408	-1.81936	-1.28421	1.72823	7.71559	0.000225867	0.0059464
B3GNT2	1.87473	0.568897	1.06237	-0.699631	7.55883	0.000264559	0.00668836
PLEK	0.774932	1.13891	1.78626	0.885591	7.55668	0.000265133	0.00669231
AIM2	0.828419	1.73014	1.82	0.779234	7.53548	0.000270884	0.00679459
HOXA9	-0.460609	-1.78737	-1.11336	0.0384577	7.48675	0.000284589	0.00702821
SNX10	0.914672	0.640009	1.62666	0.340453	7.47246	0.000288745	0.00709799
MIR210HG	-1.95669	-1.36635	-1.23405	2.63508	7.47009	0.000289441	0.00710417
GPR183	1.10911	1.02333	1.59078	1.01144	7.45045	0.000295265	0.00721197
HACD2	-0.476694	-1.52791	-0.661628	0.528313	7.44922	0.000295636	0.00721197
GDPD2	-1.1541	-2.04818	-1.65539	2.24701	7.38517	0.000315521	0.00759251
ADGRL3	-1.77121	-2.60957	-1.5432	0.258109	7.3203	0.00033707	0.00791516
C2ORF54	-1.62546	-1.40103	-1.37261	1.72759	7.27892	0.00035161	0.0081078
ZNF750	-1.20962	-1.56074	-1.39637	4.71941	7.2436	0.000364531	0.00829015
PLP1	1.68136	0.484077	0.851232	-2.03756	7.20825	0.000377953	0.00844746
CXCL9	0.320693	2.60331	2.96135	1.60381	7.09922	0.000422669	0.00900662
LAMB4	-0.59037	-1.87509	-1.23814	1.98322	7.05734	0.00044127	0.00926117
EDN1	-1.64903	-1.27127	-0.816992	0.0579923	7.0567	0.000441559	0.00926117
SLC30A9	1.58918	0.315927	0.675497	0.512775	6.86163	0.000540085	0.0104933
S100A8	1.05656	2.48247	2.45193	1.55662	6.84491	0.000549522	0.0105824
KLRD1	0.669535	1.68213	1.81207	-1.03537	6.83148	0.00055723	0.0106396
FAM167A	-0.476989	-1.83065	-1.07711	0.0715781	6.80486	0.000572832	0.0108213
KRT6C	1.88354	1.38831	1.91314	2.14197	6.7915	0.000580835	0.0108729
FA2H	-1.56225	-2.44095	-1.3638	-2.53964	6.7413	0.000611942	0.0112562
S100B	1.12403	1.74474	1.46828	0.199779	6.7217	0.000624556	0.0113609
ISL1	-1.68947	-0.794464	-0.67041	0.561513	6.6605	0.000665686	0.0118366
SPRY2	1.78952	0.784222	0.949015	-0.850658	6.64528	0.000676339	0.0119898
BTC	-1.26553	-1.53646	-1.14338	1.59235	6.61003	0.000701707	0.0122995
PIK3CA	1.59513	0.359872	0.80149	1.03071	6.54075	0.000754454	0.0128169
PRAME	0.653604	1.71036	1.60525	-0.171678	6.50176	0.000785931	0.0132145
LPL	1.43833	1.58136	1.12369	-0.500147	6.39877	0.000875758	0.0143008
KLF3-AS1	-1.06591	-1.63673	-1.13196	0.362277	6.13486	0.00115766	0.0169653
SCGB1D1	-1.67815	-2.18347	-1.46109	-1.23663	6.07656	0.0012317	0.017726
ZFP36L2	-1.90956	-1.68302	-0.879107	1.64319	6.05869	0.00125537	0.0179381
ENTHD1	1.07942	2.24496	1.76887	-2.10548	6.04983	0.00126726	0.0180427
LINC00589	1.12806	1.82866	1.28722	0.22942	5.90152	0.00148477	0.0199336
TMPRSS11D	0.45352	1.44192	1.54078	1.13181	5.67145	0.00190139	0.0231049
CXCL14	-1.65353	-1.23473	-1.23329	1.96795	5.67113	0.00190205	0.0231049
SLC47A2	-1.57861	-0.728469	-1.41451	-1.8301	5.6264	0.0019962	0.0237334
LINC00518	1.57103	0.786956	1.19844	2.10922	5.54601	0.00217767	0.0250738
TFAP2B	-1.02383	-1.65998	-1.8718	2.66305	5.50955	0.00226551	0.0256038
GNLY	0.488587	1.49063	1.69849	-0.800643	5.29911	0.002849	0.0296248
S100A7	0.62946	2.0257	1.66841	3.42846	5.18417	0.00323111	0.0322522
TARP	0.882995	1.03303	1.71305	-0.540237	5.08049	0.00362106	0.0345133
MMP3	1.73224	1.83311	1.66798	0.0889897	5.07615	0.00363841	0.0346374
APOC1	1.39658	0.877595	1.51091	-0.0458121	4.81397	0.00486206	0.0412116
KLF5	-0.565252	-1.59295	-0.849876	1.93056	4.80433	0.00491442	0.0414578
ADAMTS1	1.50871	0.283882	1.00209	-0.653122	4.7515	0.00521174	0.0431248
ZBTB43	-1.19807	-1.51615	-0.538549	-0.117692	4.72833	0.00534786	0.043842
OGN	-0.897498	-1.75452	-0.963344	-1.14993	4.67834	0.00565431	0.0455389
HOXA7	-1.60792	-1.415	-0.812384	0.489883	4.65726	0.0057889	0.0461353
LUM	1.11701	1.24985	1.50498	-0.301837	4.62893	0.00597491	0.0468939
DPY19L3	1.58353	-0.0260108	0.707272	-0.0477032	4.61099	0.00609594	0.04731
MMP12	1.7188	1.27971	1.48288	1.25396	4.558	0.00646824	0.049011
