# Supplementary material for: Shared Gene Expression and Immune Pathway Changes Associated with Progression from Nevi to Melanoma
Source: Cancers (Basel). 2021 Dec 21;14(1):3. doi: 10.3390/cancers14010003 (PMC8749980; doi:10.3390/cancers14010003)
Supplement: Supplementary file 1 [file cancers-14-00003-s001.zip › Supplementary_TableS3_Bastian_DEGs.xlsx]

## Sheet: TableS3_Bastian_DEGs
Gene	CMM-PN log2FC	AveExpr	t	P.Value	adj.P.Val	B
TNS1	-1.61697	8.93524	-13.3049	1.1e-16	1.06e-12	27.8432
PYGL	-2.50782	7.90408	-12.2899	1.59e-15	4.4e-12	25.1824
IL11RA	-1.64172	5.07837	-12.0028	3.47e-15	8.39e-12	24.464
BRCA2	1.57396	5.56635	11.8538	5.23e-15	1.12e-11	24.0508
KPNA2	1.86389	5.18151	11.3725	2e-14	2.57e-11	22.7358
ABCA8	-3.81038	6.88721	-11.3045	2.42e-14	2.75e-11	22.4977
CTSB	1.89813	8.4664	11.2724	2.65e-14	2.85e-11	22.3609
ABCA10	-2.89282	6.35598	-11.1134	4.16e-14	3.91e-11	21.9663
TMEM47	-2.80969	2.99707	-11.106	4.25e-14	3.91e-11	21.7656
ZNF214	-1.97873	2.30195	-11.0858	4.5e-14	3.96e-11	21.661
XYLT1	-2.11584	7.13064	-10.9603	6.45e-14	5.19e-11	21.4976
NR3C2	-1.65007	5.58132	-10.929	7.06e-14	5.45e-11	21.4584
OBSCN	-2.26614	7.97279	-10.861	8.58e-14	6.38e-11	21.1918
CNTN1	-2.8285	6.65498	-10.8341	9.27e-14	6.64e-11	21.1502
TRIM9	-3.03388	6.44938	-10.775	1.1e-13	7.33e-11	21.0155
FAXDC2	-1.66687	5.24773	-10.7156	1.31e-13	7.72e-11	20.8587
GSTM2	-1.50456	6.6423	-10.6918	1.4e-13	7.72e-11	20.7331
CFH	-2.32774	8.99449	-10.6398	1.63e-13	8.07e-11	20.5365
CDCA5	1.99797	3.15073	10.5365	2.2e-13	9.66e-11	20.3131
CENPF	2.17792	6.1851	10.5137	2.35e-13	9.66e-11	20.2498
HIST1H2AM	1.81562	2.87082	10.5128	2.36e-13	9.66e-11	20.2079
IQGAP3	2.56722	3.3082	10.4418	2.91e-13	1.06e-10	20.0532
PAQR4	1.53409	3.90146	10.4071	3.22e-13	1.13e-10	20.0084
PPP1R3C	-2.83153	4.33904	-10.3924	3.36e-13	1.16e-10	19.9653
PKMYT1	2.60714	2.16503	10.4663	2.7e-13	1.04e-10	19.9488
SKA1	2.74637	0.31877	10.6779	1.46e-13	7.72e-11	19.8922
APBA1	-2.06933	3.72805	-10.2964	4.46e-13	1.37e-10	19.6811
CKAP2	1.60398	5.18864	10.2795	4.69e-13	1.39e-10	19.6048
PNMA8B	-2.36678	2.57018	-10.2904	4.54e-13	1.37e-10	19.518
ECT2	1.66589	4.49166	10.2267	5.48e-13	1.53e-10	19.482
LRP8	1.85376	3.9187	10.2236	5.53e-13	1.53e-10	19.4749
FEZ1	-2.0555	4.83405	-10.1701	6.48e-13	1.72e-10	19.3089
HIST1H3I	1.75243	2.52917	10.1831	6.24e-13	1.67e-10	19.2354
NPL	1.65876	5.57773	10.1325	7.25e-13	1.87e-10	19.1398
CDC45	2.70068	1.52108	10.2313	5.41e-13	1.53e-10	19.1301
CLSPN	2.67625	2.97906	10.1063	7.84e-13	1.94e-10	19.0475
NUF2	2.14896	1.53123	10.1914	6.09e-13	1.66e-10	19.0446
CDKN3	2.05202	1.62698	10.1497	6.89e-13	1.8e-10	18.9407
CENPE	1.97119	4.5015	10.0135	1.03e-12	2.5e-10	18.8613
ARHGAP11A	2.04397	4.37703	9.99489	1.09e-12	2.61e-10	18.8088
CCNE2	2.44801	1.32998	10.1101	7.75e-13	1.94e-10	18.7399
PHYHD1	-1.68728	2.99922	-9.97211	1.17e-12	2.73e-10	18.7076
CFD	-3.02784	5.11816	-9.94366	1.27e-12	2.86e-10	18.6131
KNL1	2.38892	4.46238	9.90997	1.41e-12	3.03e-10	18.5591
MELK	2.6906	2.66301	9.94391	1.27e-12	2.86e-10	18.5402
PTTG1	2.13003	3.29674	9.89623	1.47e-12	3.08e-10	18.4911
BUB1B	2.20359	3.26873	9.89316	1.48e-12	3.08e-10	18.4777
ZNF677	-1.65071	2.9528	-9.88627	1.51e-12	3.11e-10	18.4416
CKS2	2.59247	1.5642	9.97144	1.17e-12	2.73e-10	18.4237
CHEK1	1.66022	2.91768	9.87028	1.59e-12	3.2e-10	18.3903
UHRF1	2.47394	2.96371	9.84732	1.7e-12	3.34e-10	18.3111
ESCO2	2.29191	2.66316	9.82914	1.8e-12	3.43e-10	18.2191
BIRC5	2.8338	1.15537	9.94434	1.27e-12	2.86e-10	18.2121
BUB1	2.21553	3.56631	9.79195	2.01e-12	3.7e-10	18.1979
HIST1H2AL	2.53981	2.1359	9.82748	1.81e-12	3.43e-10	18.1171
SCML2	-1.77027	1.96568	-9.8001	1.96e-12	3.68e-10	18.0457
PRX	-1.50355	3.80154	-9.72417	2.47e-12	4.19e-10	18.0105
ORC6	1.9354	1.14685	9.84281	1.73e-12	3.34e-10	17.9751
KIFC1	2.03712	3.19744	9.70194	2.64e-12	4.4e-10	17.9258
HSPA12A	-2.11182	6.54264	-9.73648	2.38e-12	4.14e-10	17.9119
KIF14	2.57997	2.97548	9.69221	2.72e-12	4.5e-10	17.8505
ARHGAP11B	1.73051	2.77323	9.64525	3.14e-12	4.97e-10	17.7194
HSPB6	-2.47598	1.3668	-9.68259	2.8e-12	4.51e-10	17.5739
E2F1	2.12059	2.13381	9.59097	3.7e-12	5.77e-10	17.4604
TROAP	2.26125	2.72181	9.55105	4.18e-12	6.17e-10	17.4313
GSG2	1.79131	1.40565	9.62059	3.38e-12	5.31e-10	17.4282
POLQ	1.82779	3.9927	9.52256	4.56e-12	6.58e-10	17.4092
DISP1	-1.78706	6.37016	-9.54331	4.28e-12	6.22e-10	17.3355
FOXM1	3.13018	3.49742	9.50448	4.82e-12	6.87e-10	17.3293
FBLN1	-2.23729	7.63767	-9.55355	4.15e-12	6.17e-10	17.3124
DNAH6	-1.80278	3.50141	-9.48704	5.08e-12	7.12e-10	17.3034
POC1A	1.73117	1.47186	9.57112	3.93e-12	6.08e-10	17.3021
HIST1H2BF	1.61327	3.32247	9.46415	5.45e-12	7.37e-10	17.2258
CENPA	2.55125	0.136064	9.68572	2.78e-12	4.51e-10	17.2138
OAS2	2.23429	6.29003	9.49216	5e-12	7.06e-10	17.1875
HIST1H2AJ	2.39723	2.21037	9.47305	5.31e-12	7.22e-10	17.1373
KIF11	1.66918	3.73112	9.41709	6.3e-12	8.18e-10	17.0951
CCNB2	2.89122	2.36607	9.45561	5.6e-12	7.46e-10	17.0819
DIAPH3	2.49215	3.16091	9.41674	6.3e-12	8.18e-10	17.0669
EDA	-2.45752	1.22252	-9.50355	4.83e-12	6.87e-10	17.013
AURKB	2.37792	1.92392	9.43769	5.91e-12	7.77e-10	16.9975
CCNE1	1.64486	1.60611	9.4493	5.71e-12	7.55e-10	16.9854
ESPL1	2.10039	3.41948	9.37783	7.1e-12	8.56e-10	16.9734
PCDHB16	-1.91165	4.31872	-9.37848	7.09e-12	8.56e-10	16.9636
CDK1	2.09653	2.51898	9.38771	6.89e-12	8.48e-10	16.9464
CDK2	1.67	5.71268	9.39114	6.82e-12	8.45e-10	16.9022
ASPM	2.70421	5.38828	9.35807	7.55e-12	8.73e-10	16.8616
MYBL2	2.81311	2.55995	9.36726	7.34e-12	8.62e-10	16.8616
TPX2	2.48389	3.83314	9.31505	8.62e-12	9.62e-10	16.7869
GINS1	1.71011	1.20905	9.41005	6.44e-12	8.24e-10	16.7845
PCDHB12	-1.84371	2.72729	-9.32756	8.29e-12	9.32e-10	16.7787
TOP2A	2.47085	5.27697	9.32759	8.29e-12	9.32e-10	16.7685
NCAPG	2.78508	3.21974	9.31101	8.72e-12	9.69e-10	16.7419
PBK	3.23687	0.974599	9.37638	7.14e-12	8.56e-10	16.5694
TTK	2.4436	2.58726	9.24957	1.05e-11	1.12e-09	16.5163
KIF18B	2.36221	2.40224	9.24228	1.08e-11	1.14e-09	16.4947
SLC7A5	1.77461	5.84049	9.2342	1.11e-11	1.16e-09	16.412
DTL	2.36701	2.594	9.18823	1.27e-11	1.28e-09	16.3459
ADGRE2	1.63285	4.39956	9.17605	1.32e-11	1.3e-09	16.343
FABP5	3.29196	5.61997	9.15882	1.4e-11	1.35e-09	16.2412
NCAPH	2.18395	2.27355	9.15193	1.43e-11	1.37e-09	16.2193
FPGT-TNNI3K	-1.56962	3.44505	-9.12627	1.54e-11	1.46e-09	16.218
PCDH7	-1.55116	9.53836	-9.17894	1.31e-11	1.3e-09	16.1368
WDR62	2.04332	3.14068	9.08135	1.78e-11	1.59e-09	16.0704
FBXO43	1.95052	0.804862	9.19157	1.26e-11	1.28e-09	16.0535
CADM2	-3.65015	-0.660174	-9.36663	7.35e-12	8.62e-10	16.0281
MCM10	2.08008	1.67044	9.11802	1.58e-11	1.48e-09	16.0249
NOCT	1.7236	3.03563	9.05809	1.91e-11	1.67e-09	16.003
CDCA3	2.15967	1.46331	9.10831	1.63e-11	1.5e-09	15.9711
AHCYL2	-1.89572	7.16904	-9.09795	1.69e-11	1.54e-09	15.9303
CEP55	2.58315	1.86224	9.0608	1.89e-11	1.66e-09	15.8746
TRABD2B	-1.99541	0.970369	-9.09171	1.72e-11	1.55e-09	15.8313
NUSAP1	2.34717	3.62722	8.99847	2.3e-11	1.86e-09	15.8298
NETO2	1.8114	2.82626	9.00415	2.26e-11	1.85e-09	15.8261
KIF15	1.89875	2.62913	9.00189	2.27e-11	1.85e-09	15.801
CAPG	1.89866	5.46554	9.0221	2.13e-11	1.82e-09	15.7941
TRPC1	-1.61774	4.66523	-9.00585	2.25e-11	1.85e-09	15.783
HIST1H2AI	2.02485	3.53823	8.97982	2.43e-11	1.94e-09	15.7731
CENPK	1.6912	1.80753	9.01829	2.16e-11	1.83e-09	15.7592
CGNL1	-2.04878	5.58411	-9.00711	2.24e-11	1.85e-09	15.7174
HK2	1.75598	5.13062	8.96707	2.53e-11	2.01e-09	15.6511
HIST1H1B	2.23991	3.60331	8.91851	2.95e-11	2.29e-09	15.5864
PLK1	1.91309	3.09755	8.91885	2.95e-11	2.29e-09	15.5821
HIST1H2BO	2.53429	2.50213	8.9336	2.81e-11	2.21e-09	15.5665
PIMREG	2.54723	-0.0283037	9.07346	1.82e-11	1.62e-09	15.4833
CKAP2L	2.52145	2.39697	8.8975	3.15e-11	2.39e-09	15.4481
HIST1H2AB	2.00546	1.22501	8.92803	2.86e-11	2.24e-09	15.4211
RTN4R	2.1076	1.4469	8.91388	2.99e-11	2.3e-09	15.3882
SGO1	2.31289	2.22248	8.87164	3.41e-11	2.54e-09	15.3587
GALR1	-3.72935	-1.52689	-9.24833	1.06e-11	1.12e-09	15.3581
RRM2	2.75403	3.03735	8.84626	3.7e-11	2.73e-09	15.343
KCNG2	-2.82498	-0.345969	-9.04011	2.02e-11	1.74e-09	15.2573
PRR11	1.68278	2.76884	8.80618	4.19e-11	3.05e-09	15.2266
ASPA	-1.68024	4.42025	-8.79836	4.3e-11	3.07e-09	15.1732
C16orf59	1.73384	0.41981	8.89627	3.16e-11	2.39e-09	15.1379
TICRR	2.04417	2.98848	8.74785	5.04e-11	3.44e-09	15.058
CRTAC1	-3.34422	7.30935	-8.8181	4.04e-11	2.94e-09	15.0565
NAALADL1	-1.55774	2.6108	-8.74516	5.08e-11	3.44e-09	15.0359
GPX3	-2.67782	6.80615	-8.80318	4.23e-11	3.05e-09	15.025
KIF18A	1.59672	2.78867	8.73881	5.18e-11	3.48e-09	15.023
SCN7A	-4.24543	3.28637	-8.69834	5.88e-11	3.82e-09	14.9047
MMP11	2.58065	3.10889	8.69456	5.95e-11	3.82e-09	14.8895
HJURP	2.61824	2.75149	8.69441	5.96e-11	3.82e-09	14.8721
FAM189A2	-1.66277	5.0335	-8.71307	5.62e-11	3.7e-09	14.8598
DMD	-2.24606	8.56588	-8.76512	4.77e-11	3.3e-09	14.8573
DEPDC1B	2.38679	1.30041	8.73858	5.18e-11	3.48e-09	14.8472
UBE2C	2.90934	2.13404	8.70196	5.82e-11	3.8e-09	14.8426
GTSE1	2.48359	2.42324	8.68685	6.1e-11	3.9e-09	14.823
PCDHB10	-1.66955	3.17925	-8.65681	6.71e-11	4.16e-09	14.7845
CDCA8	2.04886	0.804343	8.74827	5.03e-11	3.44e-09	14.7635
PLAU	1.57336	4.2292	8.65734	6.7e-11	4.16e-09	14.7465
TRIP13	1.54738	2.35078	8.63652	7.15e-11	4.37e-09	14.6863
KIF2C	2.18619	2.41649	8.62241	7.48e-11	4.54e-09	14.6336
MKI67	2.37984	6.27215	8.66133	6.61e-11	4.15e-09	14.6242
SGK1	2.05935	6.91987	8.66367	6.56e-11	4.13e-09	14.5808
HIST1H3H	1.82824	2.89433	8.5861	8.39e-11	4.94e-09	14.5614
EPOP	1.79961	0.793092	8.65501	6.75e-11	4.16e-09	14.5541
CHRDL1	-3.35117	3.32566	-8.57992	8.55e-11	5.02e-09	14.5483
IGFL1	5.30425	-1.20502	8.88021	3.32e-11	2.49e-09	14.5399
ANLN	2.87321	4.25971	8.56811	8.88e-11	5.12e-09	14.5031
HIST1H2AG	1.60984	4.10513	8.55903	9.14e-11	5.22e-09	14.463
NDNF	-3.5139	2.61209	-8.56726	8.9e-11	5.12e-09	14.4587
DLC1	-1.53403	8.70643	-8.63964	7.08e-11	4.35e-09	14.4565
WDR17	-3.03194	3.85803	-8.5343	9.88e-11	5.49e-09	14.404
NFE2L3	1.55432	4.89492	8.55451	9.27e-11	5.26e-09	14.3709
RAD51	1.787	0.852624	8.59535	8.14e-11	4.86e-09	14.3552
PCDH20	-3.38874	1.80009	-8.55923	9.13e-11	5.22e-09	14.3362
ERCC6L	2.21008	1.31264	8.55592	9.23e-11	5.26e-09	14.3112
BMP4	-1.66048	3.76533	-8.48904	1.14e-10	6.21e-09	14.2534
CDCA2	2.79433	2.69842	8.49211	1.13e-10	6.17e-09	14.246
APOBEC3B	2.02462	2.16627	8.48187	1.17e-10	6.28e-09	14.2019
RAPGEF3	-1.72469	4.48321	-8.49487	1.12e-10	6.13e-09	14.2009
AURKA	1.86804	2.31545	8.47889	1.18e-10	6.31e-09	14.1987
KIF20A	2.7826	2.09834	8.48024	1.17e-10	6.3e-09	14.1773
NDC80	2.63082	2.06436	8.4831	1.16e-10	6.27e-09	14.1709
ASF1B	2.32744	0.725671	8.52271	1.03e-10	5.66e-09	14.1086
PDE11A	3.41218	-0.813251	8.62663	7.38e-11	4.5e-09	14.0656
PRELP	-1.8539	5.95245	-8.48759	1.15e-10	6.22e-09	14.0652
RBM11	-2.63872	0.53868	-8.53043	1e-10	5.54e-09	14.061
DLGAP5	2.97435	2.36847	8.43101	1.37e-10	7.09e-09	14.0278
PON3	-2.08037	2.25932	-8.41172	1.46e-10	7.38e-09	14.0096
RAD54L	1.80234	1.93626	8.42097	1.42e-10	7.28e-09	13.9908
PMAIP1	2.50375	1.26382	8.44919	1.29e-10	6.82e-09	13.9882
PKD1L2	-1.62814	4.43845	-8.41451	1.45e-10	7.35e-09	13.9476
KIF23	2.15494	3.56537	8.37898	1.62e-10	8e-09	13.9266
COL28A1	-2.92377	3.11571	-8.36554	1.69e-10	8.26e-09	13.8851
GAS2	-3.3911	-0.0882861	-8.54275	9.62e-11	5.39e-09	13.8826
CDR1	-2.3215	8.93851	-8.44596	1.31e-10	6.85e-09	13.8392
PCDHB9	-1.96454	3.07568	-8.35026	1.77e-10	8.61e-09	13.8361
NEK2	2.72067	1.5993	8.3879	1.57e-10	7.81e-09	13.833
SLIT3	-1.90453	7.21772	-8.43197	1.37e-10	7.08e-09	13.8247
IGSF10	-2.57345	5.57739	-8.40051	1.51e-10	7.6e-09	13.8178
ATP1A2	-3.13274	1.67294	-8.37748	1.63e-10	8.02e-09	13.8133
NAP1L3	-1.74232	2.71739	-8.34383	1.81e-10	8.71e-09	13.8108
SKA3	2.14158	2.0418	8.35273	1.76e-10	8.57e-09	13.7926
IFI27	2.34411	5.256	8.37259	1.65e-10	8.12e-09	13.785
TMEM74	-2.18325	-1.45488	-8.60078	8.01e-11	4.8e-09	13.7589
HIST1H2BM	1.89614	2.17906	8.33402	1.87e-10	8.89e-09	13.752
HIST1H3C	2.3258	2.67799	8.32612	1.92e-10	9.05e-09	13.7508
GSTM3	-1.58313	4.17427	-8.33852	1.84e-10	8.83e-09	13.7361
DACT3	-1.62697	2.40133	-8.3164	1.98e-10	9.29e-09	13.7091
PRELID2	-1.55133	3.68509	-8.30684	2.04e-10	9.46e-09	13.6852
HMMR	2.38414	1.61699	8.33006	1.89e-10	8.96e-09	13.6797
CDC20	2.36741	2.29682	8.25959	2.37e-10	1.06e-08	13.5278
TRIM59	1.70808	3.33947	8.24473	2.48e-10	1.1e-08	13.5083
CCNA2	1.6337	3.03361	8.24285	2.5e-10	1.1e-08	13.5047
GGH	1.6655	3.79512	8.23013	2.6e-10	1.13e-08	13.4414
ORC1	1.70892	2.12403	8.23237	2.58e-10	1.13e-08	13.4356
GPRC5B	-1.68368	5.60688	-8.2733	2.27e-10	1.04e-08	13.4209
CRYL1	-1.55682	5.50871	-8.26281	2.34e-10	1.06e-08	13.3862
TENM1	-2.17373	4.73359	-8.23308	2.58e-10	1.13e-08	13.3562
NRXN1	-4.45863	2.5044	-8.20558	2.82e-10	1.21e-08	13.339
COL11A2	-3.57653	5.34212	-8.21169	2.76e-10	1.19e-08	13.3185
IFI30	2.18335	4.95772	8.21549	2.73e-10	1.18e-08	13.3111
PLEKHS1	2.99901	-1.47632	8.43328	1.36e-10	7.07e-09	13.3033
NYAP1	-2.03025	0.725253	-8.25109	2.43e-10	1.08e-08	13.3007
RFTN2	-1.56162	5.70308	-8.23989	2.52e-10	1.11e-08	13.2935
SLC16A6	3.03571	3.32649	8.17016	3.15e-10	1.3e-08	13.2765
GALNT16	-2.11594	3.39702	-8.17415	3.11e-10	1.29e-08	13.2743
PIF1	1.61594	1.77584	8.18606	3e-10	1.25e-08	13.2688
TIGAR	2.72416	1.36271	8.19586	2.91e-10	1.23e-08	13.2314
HIST1H2BB	2.00837	1.94346	8.16135	3.25e-10	1.33e-08	13.1988
CDO1	-2.87302	-0.0899849	-8.26386	2.34e-10	1.06e-08	13.1929
CNTD1	-2.31482	-1.58771	-8.42175	1.41e-10	7.28e-09	13.1873
TAP1	1.74946	6.01083	8.19535	2.91e-10	1.23e-08	13.1351
CDC25C	2.34328	-0.0845177	8.24717	2.47e-10	1.09e-08	13.1253
OSBPL3	1.78748	5.70049	8.16976	3.16e-10	1.3e-08	13.0918
PAK3	-1.89738	1.1889	-8.14772	3.39e-10	1.36e-08	13.0906
EFHD1	-2.99477	3.29292	-8.10946	3.83e-10	1.5e-08	13.087
CDC25A	2.42986	0.457946	8.19591	2.9e-10	1.23e-08	13.0842
HIF3A	-3.9415	3.28432	-8.10756	3.86e-10	1.51e-08	13.0754
ADIRF	-1.70165	3.67177	-8.10901	3.84e-10	1.5e-08	13.0557
ZNF578	-1.56471	2.06911	-8.0895	4.09e-10	1.56e-08	12.9881
EPSTI1	2.0118	4.29581	8.09303	4.04e-10	1.54e-08	12.9773
PI16	-3.04269	4.72185	-8.09646	4e-10	1.53e-08	12.9324
CCDC80	-1.61827	8.76705	-8.13873	3.49e-10	1.39e-08	12.8574
SPC24	1.68045	0.443806	8.11254	3.8e-10	1.49e-08	12.8573
DDIAS	1.79199	2.46276	8.01445	5.2e-10	1.88e-08	12.7816
PALM	-1.8086	4.12239	-8.03232	4.91e-10	1.78e-08	12.7807
CCNB1	1.6586	3.34298	8.01013	5.28e-10	1.89e-08	12.7702
SCARA3	-1.73093	5.59809	-8.06999	4.35e-10	1.64e-08	12.7617
NPAS3	-2.19212	2.68939	-7.99845	5.48e-10	1.93e-08	12.7379
LDHD	-2.07176	1.74908	-8.01378	5.21e-10	1.88e-08	12.7378
SPEF2	-1.53256	4.6053	-8.03606	4.85e-10	1.77e-08	12.7329
SNX10	2.13799	3.94288	8.00431	5.38e-10	1.91e-08	12.7282
E2F2	2.44211	1.39528	8.01926	5.12e-10	1.85e-08	12.699
FHL1	-1.61626	4.44756	-8.00787	5.32e-10	1.9e-08	12.6593
PRIMA1	-3.99134	-0.733744	-8.15627	3.3e-10	1.34e-08	12.626
FAM111B	2.04753	2.65723	7.95932	6.22e-10	2.11e-08	12.618
MFSD12	1.73126	7.82741	8.05507	4.57e-10	1.69e-08	12.6085
NEDD4L	1.96608	5.04604	7.99543	5.53e-10	1.94e-08	12.6038
RGS6	-3.01789	-0.585957	-8.10275	3.92e-10	1.51e-08	12.5935
CNTFR	-3.49576	1.64719	-7.97515	5.91e-10	2.04e-08	12.5746
SOD3	-2.19089	4.50421	-7.97564	5.9e-10	2.04e-08	12.5677
NEIL3	2.531	1.60277	7.96362	6.13e-10	2.1e-08	12.5537
C1orf145	-2.07565	0.0136209	-8.03776	4.83e-10	1.76e-08	12.5482
OSR1	-2.01062	2.30455	-7.93516	6.72e-10	2.23e-08	12.5393
CNTN2	-3.27905	0.607413	-7.99872	5.47e-10	1.93e-08	12.5135
ULBP2	2.77265	-1.13849	8.10589	3.88e-10	1.51e-08	12.5116
DEPDC1	2.65828	1.70985	7.93313	6.76e-10	2.24e-08	12.4685
ABCG4	3.05819	-0.444861	8.02939	4.96e-10	1.8e-08	12.4668
PLAC9	-2.64044	2.87004	-7.90466	7.42e-10	2.38e-08	12.4489
BOC	-1.55382	6.46398	-7.98539	5.71e-10	1.99e-08	12.4285
TNFRSF21	1.62738	5.55043	7.95931	6.22e-10	2.11e-08	12.4223
CTNNA3	-2.89622	-0.571215	-8.0438	4.73e-10	1.74e-08	12.417
TACR2	-1.71884	1.07525	-7.91771	7.11e-10	2.32e-08	12.3537
SLC22A17	-1.66862	4.40784	-7.90567	7.39e-10	2.38e-08	12.3494
PRC1	1.68045	3.67063	7.8781	8.08e-10	2.53e-08	12.3422
MND1	1.94212	0.457899	7.93266	6.77e-10	2.24e-08	12.3016
IL17D	-2.49188	1.84541	-7.86596	8.4e-10	2.61e-08	12.276
FAR2	-1.7915	5.6217	-7.91802	7.1e-10	2.32e-08	12.2682
CNRIP1	-1.67036	5.53362	-7.91333	7.21e-10	2.34e-08	12.268
ADGRB3	-2.89433	4.32792	-7.85971	8.58e-10	2.66e-08	12.2542
ARNTL2	2.29666	3.7533	7.84959	8.86e-10	2.72e-08	12.2523
KCNJ13	-2.79011	4.19576	-7.85295	8.77e-10	2.71e-08	12.242
COL24A1	-2.51397	4.98866	-7.8698	8.3e-10	2.6e-08	12.2263
TYMP	1.66766	5.989	7.90829	7.33e-10	2.37e-08	12.2086
NXPH3	-2.15471	0.455192	-7.88255	7.97e-10	2.51e-08	12.1855
HIPK2	-1.58138	8.76991	-7.92206	7.01e-10	2.3e-08	12.1619
BLID	-2.02093	0.807266	-7.86585	8.41e-10	2.61e-08	12.157
TK1	2.12464	1.5821	7.8046	1.03e-09	3.07e-08	12.0832
AC244669.2	-2.40035	0.772033	-7.836	9.26e-10	2.81e-08	12.0674
CACNA2D2	-1.81445	1.22153	-7.80473	1.02e-09	3.07e-08	12.0648
MMP13	4.91826	-1.30393	8.00804	5.31e-10	1.9e-08	12.0545
MTFR2	1.78456	1.21632	7.80154	1.04e-09	3.09e-08	12.027
SLIT2	-2.07095	5.73176	-7.83456	9.3e-10	2.81e-08	11.9941
SDS	2.91725	-0.86206	7.89145	7.74e-10	2.46e-08	11.9423
IGSF1	-3.09286	0.0593481	-7.82666	9.54e-10	2.88e-08	11.9337
HNRNPLP2	-2.25909	2.00919	-7.73581	1.28e-09	3.7e-08	11.8852
ATOH8	-1.71098	2.80708	-7.72456	1.33e-09	3.81e-08	11.8825
LHFPL3	-4.23711	3.32505	-7.72456	1.33e-09	3.81e-08	11.8778
ATP1B2	-2.12909	2.91096	-7.7111	1.39e-09	3.93e-08	11.8411
CCDC148	-1.62287	1.08245	-7.73674	1.28e-09	3.7e-08	11.822
C10orf82	-2.49636	-1.1529	-7.88101	8.01e-10	2.52e-08	11.7957
MAMDC2	-2.25362	3.63417	-7.71508	1.37e-09	3.9e-08	11.7938
STX11	1.66967	2.17573	7.69428	1.47e-09	4.11e-08	11.7836
SCARA5	-3.14681	4.31013	-7.7014	1.43e-09	4.04e-08	11.7261
SULT1C4	-2.56295	0.567682	-7.73301	1.29e-09	3.72e-08	11.7168
SLITRK4	-2.13531	2.05172	-7.66271	1.63e-09	4.43e-08	11.6733
SZT2-AS1	-1.55727	-0.0430692	-7.74111	1.26e-09	3.67e-08	11.6618
NCAM1	-3.18783	4.04812	-7.66553	1.61e-09	4.41e-08	11.6521
NR4A3	2.30648	2.93947	7.64986	1.69e-09	4.57e-08	11.6485
IL12RB2	3.0044	3.47386	7.65199	1.68e-09	4.55e-08	11.6446
CADM3	-2.97238	2.86095	-7.63967	1.75e-09	4.68e-08	11.6165
TMPRSS5	-2.5395	2.01272	-7.63961	1.75e-09	4.68e-08	11.5863
IL1RAPL2	-3.55288	-2.06457	-7.88496	7.9e-10	2.5e-08	11.5709
CNR1	-2.62759	1.76781	-7.63222	1.79e-09	4.76e-08	11.5596
TREM2	3.29516	0.486429	7.67573	1.56e-09	4.29e-08	11.5536
KIF4A	1.73035	3.47767	7.61884	1.87e-09	4.94e-08	11.532
TIMP4	-3.36202	-0.239831	-7.71829	1.36e-09	3.87e-08	11.5163
AC087632.1	1.90839	1.36082	7.61881	1.87e-09	4.94e-08	11.4996
KCNMB4	-1.54893	1.07202	-7.63281	1.79e-09	4.76e-08	11.4987
TIMP3	-1.81578	6.56156	-7.69438	1.47e-09	4.11e-08	11.493
RNF150	-1.91973	3.08767	-7.59568	2.02e-09	5.24e-08	11.4698
ANGPTL1	-2.83001	2.63207	-7.57915	2.13e-09	5.47e-08	11.4252
AFF3	-1.68228	6.07149	-7.65441	1.67e-09	4.52e-08	11.3908
SDSL	1.57806	0.427445	7.61344	1.91e-09	5e-08	11.3751
CHRNA6	2.39782	-0.689526	7.64101	1.74e-09	4.67e-08	11.3237
HIST1H3B	2.22285	2.94733	7.54231	2.41e-09	6.01e-08	11.3078
ZNF536	-2.4954	1.33842	-7.5604	2.27e-09	5.74e-08	11.283
ATP4B	-3.33833	-0.691649	-7.69	1.49e-09	4.15e-08	11.2827
MRAP2	-1.91507	0.407153	-7.58839	2.07e-09	5.34e-08	11.2753
XKR4	-4.16437	1.35341	-7.56195	2.26e-09	5.72e-08	11.2718
TNFRSF19	2.05445	4.81316	7.57238	2.18e-09	5.58e-08	11.2679
NLRP14	-2.08394	-0.768692	-7.65259	1.68e-09	4.55e-08	11.2396
NOVA1	-2.45836	2.63429	-7.5144	2.64e-09	6.49e-08	11.2212
PRDM5	-1.55027	4.20933	-7.54997	2.35e-09	5.89e-08	11.221
HIST1H3J	2.44439	0.977017	7.54161	2.41e-09	6.01e-08	11.2175
LGI4	-2.5634	4.77671	-7.55975	2.27e-09	5.74e-08	11.2153
RELN	-3.22123	4.42629	-7.52871	2.51e-09	6.23e-08	11.171
GPR3	1.98046	-0.646223	7.59786	2.01e-09	5.21e-08	11.1282
AS3MT	-1.78908	1.94284	-7.48493	2.9e-09	6.96e-08	11.1189
CLEC3B	-2.34626	4.0974	-7.51489	2.63e-09	6.48e-08	11.1141
ANGPTL5	-2.98572	0.822644	-7.50621	2.71e-09	6.64e-08	11.104
FABP5P7	3.75308	4.27276	7.48529	2.9e-09	6.96e-08	11.1002
SERINC2	2.27293	4.32078	7.50402	2.73e-09	6.68e-08	11.0962
TDO2	3.74104	0.178884	7.54333	2.4e-09	5.99e-08	11.096
CILP	-2.56878	3.46276	-7.48497	2.9e-09	6.96e-08	11.0901
FAM72B	1.92103	-0.143109	7.56255	2.25e-09	5.72e-08	11.0871
AUNIP	2.74561	0.441859	7.5157	2.62e-09	6.48e-08	11.0616
TMEM163	5.4902	0.372174	7.55376	2.32e-09	5.83e-08	11.0594
EPGN	3.36187	-1.27349	7.60221	1.98e-09	5.16e-08	11.0137
CDKN1C	-2.07095	3.78744	-7.46205	3.13e-09	7.37e-08	11.0024
GSTM5	-2.33052	1.02772	-7.44744	3.28e-09	7.65e-08	10.9398
ELN	-2.12664	4.97112	-7.48706	2.88e-09	6.94e-08	10.937
ITGAX	1.79765	5.66831	7.48605	2.89e-09	6.96e-08	10.8763
HIST2H3C	2.11218	4.00053	7.42044	3.58e-09	8.2e-08	10.8697
RGMA	-1.80391	2.89724	-7.40014	3.83e-09	8.62e-08	10.8476
SERPINB8	1.64636	4.19303	7.41443	3.65e-09	8.32e-08	10.8156
CENPU	1.91129	3.53134	7.38574	4.01e-09	8.99e-08	10.7892
PDGFRL	-2.25857	2.41176	-7.36589	4.28e-09	9.49e-08	10.7526
ABCA6	-1.70565	7.41731	-7.47022	3.04e-09	7.23e-08	10.7205
CYP4Z1	-2.90585	-1.07389	-7.49901	2.77e-09	6.75e-08	10.7194
CDT1	1.52709	1.95736	7.35619	4.42e-09	9.71e-08	10.7137
RMI2	1.78063	0.575649	7.39292	3.92e-09	8.8e-08	10.7136
HEY1	2.02419	3.1246	7.34784	4.54e-09	9.9e-08	10.6842
ARHGEF37	-1.65535	5.36381	-7.42046	3.58e-09	8.2e-08	10.6804
SLC16A3	1.72754	3.33197	7.34584	4.57e-09	9.95e-08	10.6572
PRSS27	2.05423	1.48693	7.33845	4.69e-09	1.02e-07	10.6427
CORO2B	-1.78629	6.27463	-7.41902	3.6e-09	8.23e-08	10.6181
FOSL1	2.99059	2.54397	7.31964	4.98e-09	1.07e-07	10.6023
TMPRSS11D	4.4719	-1.21065	7.44594	3.3e-09	7.68e-08	10.5887
ABCA9	-1.95969	6.57275	-7.41561	3.64e-09	8.3e-08	10.5801
ENHO	-2.07673	0.447611	-7.34799	4.54e-09	9.9e-08	10.5502
SSTR1	-2.33288	-1.84994	-7.47909	2.96e-09	7.05e-08	10.5307
F12	2.20646	0.406188	7.34453	4.59e-09	9.98e-08	10.5296
GALNT6	1.95949	2.96495	7.29866	5.34e-09	1.13e-07	10.5244
STAT1	1.50609	8.01139	7.41196	3.68e-09	8.37e-08	10.5167
OIP5	1.71576	-0.0696016	7.34876	4.53e-09	9.9e-08	10.4833
KCNT2	-3.09081	4.44299	-7.30632	5.21e-09	1.11e-07	10.4598
NTRK3	-2.36331	1.18609	-7.28908	5.51e-09	1.16e-07	10.4579
CHL1	-1.66297	8.49252	-7.38929	3.97e-09	8.89e-08	10.4347
PIR	-1.67962	5.91182	-7.35738	4.4e-09	9.68e-08	10.424
ACADL	-4.76117	0.539961	-7.32122	4.96e-09	1.07e-07	10.4187
PCDH11X	-3.43076	0.827207	-7.2832	5.62e-09	1.18e-07	10.39
MAGED4B	-2.0759	0.143299	-7.31428	5.07e-09	1.09e-07	10.3819
SORBS2	-1.86568	5.6149	-7.3328	4.77e-09	1.03e-07	10.3814
LGALS9B	3.52914	-1.14939	7.3668	4.27e-09	9.47e-08	10.3543
KCNK10	2.3668	-0.53449	7.30526	5.22e-09	1.11e-07	10.3372
CCL3	3.13516	0.220351	7.26587	5.95e-09	1.24e-07	10.2799
S100A9	5.0435	4.11139	7.21505	7.02e-09	1.42e-07	10.2592
ATP8A1	-2.26885	6.0849	-7.3114	5.12e-09	1.09e-07	10.2585
TNFRSF12A	1.78505	2.09815	7.20998	7.14e-09	1.43e-07	10.2574
ZDHHC15	-1.96056	0.842966	-7.20126	7.35e-09	1.47e-07	10.1625
GPRIN1	1.82747	2.97278	7.17911	7.91e-09	1.56e-07	10.1496
BCAN	-3.16875	6.70078	-7.26861	5.89e-09	1.23e-07	10.1441
NUDT10	-2.57644	-0.126632	-7.24552	6.36e-09	1.31e-07	10.1321
AL109811.1	-1.61098	-0.0316454	-7.22988	6.69e-09	1.36e-07	10.1224
B4GALNT4	-1.76548	4.6974	-7.22389	6.82e-09	1.38e-07	10.1191
PHF24	-2.29336	1.36442	-7.17437	8.03e-09	1.58e-07	10.118
HPSE2	-3.58944	3.71923	-7.17146	8.11e-09	1.58e-07	10.105
CHADL	-2.67845	3.65182	-7.17178	8.1e-09	1.58e-07	10.1018
SLAMF8	1.78648	4.86035	7.22109	6.89e-09	1.39e-07	10.0951
OGN	-3.58223	1.72114	-7.16382	8.31e-09	1.61e-07	10.0951
HPN	-2.38789	1.8866	-7.15854	8.46e-09	1.64e-07	10.0852
FXYD1	-3.1655	1.77879	-7.15413	8.58e-09	1.66e-07	10.0655
WNK4	-2.9067	4.93277	-7.19599	7.48e-09	1.49e-07	10.0586
MEGF10	-3.97985	4.15357	-7.13531	9.13e-09	1.74e-07	9.99784
MNX1	3.39509	-1.10055	7.24255	6.42e-09	1.32e-07	9.98872
ANGPT4	-2.50734	-1.31724	-7.24004	6.47e-09	1.33e-07	9.96241
CALN1	-3.184	-0.443514	-7.2035	7.3e-09	1.46e-07	9.96121
LIFR	-1.60151	5.61689	-7.1976	7.44e-09	1.48e-07	9.91751
OSR2	-1.7499	3.49937	-7.11724	9.69e-09	1.83e-07	9.89612
TTC39A	3.21201	2.25078	7.09514	1.04e-08	1.95e-07	9.8923
ATP6V0D2	4.28776	-0.992011	7.22414	6.82e-09	1.38e-07	9.89103
ADCY2	2.77071	4.53826	7.11485	9.77e-09	1.84e-07	9.84517
BAIAP3	-2.52912	2.71173	-7.06622	1.15e-08	2.12e-07	9.79819
FAM180B	-1.72498	1.1257	-7.04144	1.24e-08	2.27e-07	9.69152
HFM1	-1.893	3.06781	-7.03645	1.26e-08	2.3e-07	9.67455
RIPPLY2	-2.8603	-2.53298	-7.23094	6.67e-09	1.36e-07	9.63339
RYR3	-2.3459	3.81679	-7.04179	1.24e-08	2.27e-07	9.61872
TAS1R1	-2.14889	0.00317121	-7.06453	1.15e-08	2.13e-07	9.61824
FAM43B	-2.67604	-2.14122	-7.16374	8.32e-09	1.61e-07	9.54083
FAM83D	2.48461	2.29219	6.98015	1.52e-08	2.7e-07	9.53073
HSPB2-C11orf52	-2.24619	2.99034	-6.97623	1.54e-08	2.73e-07	9.51137
HIST1H2BH	1.86743	3.34951	6.97152	1.57e-08	2.77e-07	9.4637
PTGIS	-1.71399	3.40653	-6.98007	1.52e-08	2.7e-07	9.46367
TREML1	2.43455	-0.736916	7.02686	1.31e-08	2.37e-07	9.44594
HNRNPCP6	-2.10086	-2.44475	-7.15275	8.62e-09	1.66e-07	9.44591
PRRG3	-2.532	-0.539452	-7.01115	1.37e-08	2.48e-07	9.43246
PODN	-1.76933	5.47841	-7.04183	1.24e-08	2.27e-07	9.42698
DPF1	2.78579	-0.92377	7.03805	1.26e-08	2.29e-07	9.42339
ADH1B	-3.87906	2.77465	-6.9482	1.69e-08	2.94e-07	9.42076
EIF4BP6	-2.39422	2.86792	-6.93876	1.75e-08	3e-07	9.39173
AC096564.1	-2.60817	0.157183	-6.97788	1.53e-08	2.72e-07	9.37362
FCRLA	3.23143	0.540038	6.95186	1.67e-08	2.92e-07	9.37061
MAPT	-1.94196	2.58307	-6.92647	1.82e-08	3.09e-07	9.35691
NAALAD2	-3.26302	2.16697	-6.925	1.83e-08	3.1e-07	9.35568
PCDHGA2	-1.87355	3.33983	-6.93302	1.78e-08	3.05e-07	9.33275
AC011473.4	4.56873	-1.18193	7.0192	1.34e-08	2.42e-07	9.299
SLC2A1	2.02031	6.31325	7.00964	1.38e-08	2.49e-07	9.26927
AC064852.1	-2.52472	-2.77479	-7.12279	9.51e-09	1.8e-07	9.22258
CLEC5A	1.7531	0.201506	6.90621	1.94e-08	3.28e-07	9.21114
PLBD1	1.5592	4.8089	6.95003	1.68e-08	2.93e-07	9.20457
SCUBE2	2.743	5.31784	6.93607	1.76e-08	3.02e-07	9.18024
AC092143.1	1.97772	4.98686	6.92648	1.82e-08	3.09e-07	9.17914
RAB17	2.46679	1.71832	6.86916	2.2e-08	3.61e-07	9.1699
MICAL2	1.60023	6.79029	6.98742	1.49e-08	2.65e-07	9.16837
KLHDC7B	2.76129	1.45332	6.86555	2.22e-08	3.64e-07	9.16082
IGSF6	1.66095	3.02087	6.87235	2.17e-08	3.59e-07	9.15109
MYOT	-2.53843	0.298875	-6.88836	2.06e-08	3.44e-07	9.15004
NXPE2	-1.87018	-0.630989	-6.93539	1.76e-08	3.03e-07	9.14411
CD80	2.27397	0.78704	6.85672	2.29e-08	3.72e-07	9.10987
CMTM5	-2.63748	1.24729	-6.84622	2.37e-08	3.84e-07	9.08489
WIF1	-4.07144	-1.42127	-6.9698	1.58e-08	2.78e-07	9.06713
COL21A1	-1.93745	3.65968	-6.86362	2.24e-08	3.65e-07	9.0614
TRPV4	1.8373	3.23279	6.83981	2.42e-08	3.91e-07	9.04537
ERBB4	-3.01351	-0.308814	-6.86508	2.23e-08	3.64e-07	8.99988
SLC2A4	-1.80747	-0.149381	-6.85238	2.32e-08	3.77e-07	8.99725
E2F7	2.40249	2.46721	6.80745	2.69e-08	4.26e-07	8.97921
S100A8	5.53683	4.03434	6.81204	2.65e-08	4.21e-07	8.97878
WARS	1.57859	6.90465	6.92913	1.8e-08	3.08e-07	8.96982
LYVE1	-2.24569	2.67269	-6.80548	2.71e-08	4.28e-07	8.95596
PPIAP19	-2.07825	-0.122613	-6.84077	2.41e-08	3.9e-07	8.94997
NPTXR	-1.75179	1.74808	-6.79737	2.78e-08	4.37e-07	8.94567
MYOZ3	-1.8238	-1.7019	-6.92688	1.82e-08	3.09e-07	8.93546
NTNG1	-4.01113	2.92161	-6.78959	2.86e-08	4.48e-07	8.92601
SOWAHA	-2.61798	-0.720161	-6.87142	2.18e-08	3.59e-07	8.907
FAM19A3	-2.12879	-1.59117	-6.91593	1.88e-08	3.19e-07	8.90037
MALL	2.16771	2.85402	6.78643	2.89e-08	4.52e-07	8.89677
AOX1	-1.8267	4.99481	-6.86786	2.21e-08	3.62e-07	8.89418
FAM181B	-2.32542	0.339341	-6.80106	2.75e-08	4.33e-07	8.88745
IL36G	4.87101	-0.724049	6.85753	2.28e-08	3.72e-07	8.87981
CACNA1D	2.00477	3.32338	6.78776	2.87e-08	4.5e-07	8.87905
FAHD2CP	-1.71095	4.70181	-6.82628	2.53e-08	4.05e-07	8.83582
TYMS	1.50338	4.31519	6.78531	2.9e-08	4.53e-07	8.7753
PRCD	-1.95744	-0.999528	-6.82516	2.54e-08	4.06e-07	8.77393
PLCXD3	-3.29822	-1.47393	-6.864	2.23e-08	3.65e-07	8.76259
AL035681.1	-1.60717	1.13262	-6.74517	3.31e-08	5.07e-07	8.75269
SCN1B	-1.95365	3.39082	-6.7439	3.32e-08	5.08e-07	8.73922
FAM198A	-1.75347	1.81012	-6.71413	3.67e-08	5.49e-07	8.68661
SLC25A21	-2.00676	0.309237	-6.74085	3.36e-08	5.12e-07	8.68121
CYP2S1	1.64799	1.86993	6.71108	3.71e-08	5.54e-07	8.67728
TMOD1	-1.61574	6.27349	-6.82606	2.53e-08	4.05e-07	8.66828
C1QTNF7	-2.61303	1.48628	-6.70907	3.73e-08	5.56e-07	8.65993
CLEC7A	1.52856	4.15581	6.75008	3.26e-08	5.01e-07	8.64218
TUB	-1.67457	3.75645	-6.73222	3.45e-08	5.24e-07	8.64114
GPR160	1.67842	1.92597	6.69186	3.95e-08	5.8e-07	8.61504
IL36RN	4.96244	-0.269996	6.73773	3.39e-08	5.16e-07	8.58162
OASL	2.38823	2.08757	6.68113	4.09e-08	5.98e-07	8.58129
TEPP	-2.05704	-1.05348	-6.74507	3.31e-08	5.07e-07	8.55921
PKDCC	-2.23837	1.99462	-6.66805	4.27e-08	6.2e-07	8.54048
PI15	2.42457	0.294266	6.68111	4.09e-08	5.98e-07	8.5234
VSIG10L	2.11858	3.31743	6.67431	4.18e-08	6.1e-07	8.511
PCDHGB8P	-1.70945	-0.777493	-6.73212	3.46e-08	5.24e-07	8.5096
MGP	-2.1973	5.3585	-6.7572	3.18e-08	4.9e-07	8.50909
ADAMDEC1	3.96382	1.94113	6.65882	4.41e-08	6.34e-07	8.50754
RGS1	3.40381	2.38297	6.64461	4.62e-08	6.62e-07	8.46526
CAPN6	-2.91215	0.082391	-6.66715	4.29e-08	6.21e-07	8.45816
DENND2A	-1.82839	3.54866	-6.66915	4.26e-08	6.18e-07	8.45286
ELANE	-2.89218	-0.125484	-6.6738	4.19e-08	6.11e-07	8.42982
FGF2	-1.80988	4.80359	-6.69972	3.85e-08	5.67e-07	8.39846
NUP210	1.70511	5.08615	6.7097	3.72e-08	5.55e-07	8.38164
RERGL	-3.90708	-1.41372	-6.71893	3.61e-08	5.42e-07	8.38145
KLHL34	-1.74349	0.847652	-6.62015	5.01e-08	7.07e-07	8.35167
MSR1	1.62093	5.41033	6.69993	3.84e-08	5.67e-07	8.33997
HSPB2	-3.03275	-0.498168	-6.6783	4.13e-08	6.04e-07	8.3358
NAPA-AS1	-1.59749	-1.26745	-6.69341	3.93e-08	5.78e-07	8.33049
DFNA5	1.90251	2.10546	6.59562	5.43e-08	7.59e-07	8.31003
GPR84	2.07571	-0.411214	6.62516	4.92e-08	6.96e-07	8.2819
RAET1L	3.39741	-1.3568	6.66751	4.28e-08	6.2e-07	8.26256
SGSM1	-2.31853	1.93768	-6.57573	5.8e-08	8.02e-07	8.24787
PRKAA2	-2.08214	-0.221272	-6.60922	5.19e-08	7.3e-07	8.24569
THSD7B	-2.54158	-0.153188	-6.60037	5.35e-08	7.5e-07	8.22358
SIGLEC10	2.04034	1.42612	6.5683	5.95e-08	8.21e-07	8.22223
HCN1	-3.53211	3.55842	-6.57776	5.76e-08	7.98e-07	8.21668
ZNF695	1.72066	0.791532	6.57679	5.78e-08	8e-07	8.21614
DGKB	-2.48046	-0.191342	-6.57538	5.81e-08	8.03e-07	8.14578
MMP10	4.43432	-1.76009	6.64059	4.68e-08	6.69e-07	8.11926
KMO	1.77871	1.31876	6.53772	6.58e-08	8.89e-07	8.11916
KRT16	5.02561	5.37361	6.59139	5.51e-08	7.68e-07	8.10905
WNT5A	2.15685	2.55633	6.52733	6.81e-08	9.15e-07	8.0776
C14orf132	-1.62963	1.03568	-6.5247	6.87e-08	9.22e-07	8.07275
KRT16P6	3.4597	-0.199292	6.54566	6.41e-08	8.72e-07	8.06242
AC104852.1	3.4095	-2.09013	6.63597	4.75e-08	6.75e-07	8.04722
GLTP	1.73478	5.38582	6.60874	5.2e-08	7.3e-07	8.0345
ART5	-1.85083	-1.37508	-6.58686	5.59e-08	7.79e-07	8.01655
BEGAIN	-1.5944	2.06706	-6.50165	7.42e-08	9.83e-07	8.01199
CELSR1	1.54186	7.00892	6.63675	4.74e-08	6.74e-07	8.01117
HIST1H3F	1.86725	2.35446	6.50035	7.45e-08	9.85e-07	7.99933
U82695.1	-3.14833	0.740957	-6.50533	7.33e-08	9.73e-07	7.9619
AGTR1	-1.88101	1.63169	-6.47952	7.98e-08	1.04e-06	7.9429
LRP1B	-2.47906	3.19965	-6.49853	7.49e-08	9.9e-07	7.93942
PHF21B	-2.083	-0.989158	-6.55089	6.3e-08	8.6e-07	7.93397
PKNOX2	-1.5517	5.89652	-6.58812	5.57e-08	7.76e-07	7.90992
RNF182	3.25975	0.671232	6.47832	8.01e-08	1.04e-06	7.90726
GJB2	3.66531	4.31008	6.51079	7.2e-08	9.58e-07	7.90361
SYDE2	-1.60813	4.87203	-6.54241	6.48e-08	8.79e-07	7.88939
AC048382.5	-1.91853	-2.77794	-6.63978	4.69e-08	6.7e-07	7.8878
LYPD1	3.05633	1.33494	6.46552	8.36e-08	1.08e-06	7.88241
SERPINA1	2.4041	3.04693	6.46821	8.29e-08	1.08e-06	7.86484
LYZ	1.82554	5.76319	6.5579	6.15e-08	8.44e-07	7.82632
CYSRT1	3.30089	0.669498	6.45334	8.71e-08	1.12e-06	7.82317
IGSF5	-2.50974	-2.73089	-6.61441	5.1e-08	7.18e-07	7.81306
MYO15B	-2.48227	-2.33504	-6.5651	6.01e-08	8.27e-07	7.79414
LAMB3	2.37841	4.63364	6.50145	7.42e-08	9.83e-07	7.79344
MELTF-AS1	-1.75843	-1.68512	-6.52346	6.9e-08	9.25e-07	7.76177
DNALI1	-1.91345	1.1684	-6.42349	9.61e-08	1.22e-06	7.74889
FBXO2	-2.02582	2.20555	-6.41732	9.81e-08	1.24e-06	7.74238
MATN4	-3.36538	-0.773515	-6.47067	8.22e-08	1.07e-06	7.74124
ZNF334	-1.9753	3.61537	-6.44099	9.07e-08	1.16e-06	7.70623
WBSCR17	-2.10011	-0.161616	-6.42967	9.42e-08	1.2e-06	7.70588
ITGA3	1.56836	6.16982	6.52606	6.84e-08	9.18e-07	7.69341
LVRN	-2.03407	1.68745	-6.39794	1.05e-07	1.3e-06	7.68305
SHISA9	-2.47243	-1.56779	-6.46569	8.36e-08	1.08e-06	7.65566
FLNC	-1.78153	4.49537	-6.46484	8.38e-08	1.08e-06	7.6501
SLC25A21-AS1	-2.35334	-1.97346	-6.48789	7.76e-08	1.02e-06	7.63107
F5	-3.34886	6.89864	-6.50573	7.32e-08	9.73e-07	7.61358
AL161772.1	-1.63222	1.58764	-6.37212	1.14e-07	1.4e-06	7.6021
TMEM132C	-2.2235	1.13115	-6.36621	1.16e-07	1.42e-06	7.58156
SLC1A7	-1.92136	-1.56273	-6.44164	9.05e-08	1.16e-06	7.58024
KLK9	4.71404	-0.785318	6.41548	9.87e-08	1.24e-06	7.5741
C10orf99	5.15312	-0.248895	6.40013	1.04e-07	1.29e-06	7.56551
C12orf56	3.7205	-0.22993	6.39241	1.07e-07	1.32e-06	7.56332
PRDM1	1.89489	4.72748	6.43879	9.14e-08	1.17e-06	7.56042
BIK	2.1639	-0.994095	6.37847	1.12e-07	1.37e-06	7.47066
EFCAB1	-3.29879	-0.277212	-6.37919	1.11e-07	1.37e-06	7.46937
NOD2	2.03187	1.16284	6.32625	1.33e-07	1.59e-06	7.45421
GDNF-AS1	-3.79552	-0.723449	-6.38176	1.1e-07	1.36e-06	7.44706
DSC2	2.42096	4.99418	6.40872	1.01e-07	1.26e-06	7.44259
SLC9A7	1.60592	3.46368	6.34658	1.24e-07	1.5e-06	7.40924
CPED1	-1.59008	4.91765	-6.40268	1.03e-07	1.29e-06	7.38643
TUBA4A	2.05273	5.41614	6.40669	1.02e-07	1.27e-06	7.38119
OLR1	3.21982	-1.70455	6.3859	1.09e-07	1.34e-06	7.37865
FUT3	2.9859	0.0411666	6.32001	1.36e-07	1.61e-06	7.37728
NEFL	2.65801	-0.318888	6.32081	1.35e-07	1.61e-06	7.36231
SCN1A	-2.67395	-1.5319	-6.36765	1.16e-07	1.41e-06	7.33338
XCL2	2.51824	-0.871176	6.32609	1.33e-07	1.59e-06	7.31957
ASIP	-2.26287	-1.45949	-6.35385	1.21e-07	1.47e-06	7.31937
CCDC8	-1.56799	4.51135	-6.35351	1.21e-07	1.47e-06	7.30428
LPL	-2.20989	2.58438	-6.27775	1.56e-07	1.82e-06	7.29272
MFAP5	-2.92332	1.20159	-6.27355	1.58e-07	1.84e-06	7.2891
ADRA1A	-4.05723	-0.380006	-6.30656	1.42e-07	1.67e-06	7.26966
PGM5P2	-1.91734	-0.451175	-6.29667	1.46e-07	1.72e-06	7.25402
GNA15	1.78957	3.25871	6.27515	1.57e-07	1.83e-06	7.20887
CXCL8	3.01335	-1.07621	6.30339	1.43e-07	1.69e-06	7.20589
AL355312.3	2.54028	-2.03907	6.33009	1.31e-07	1.57e-06	7.18815
HMGN2P15	-1.80292	-1.74977	-6.31934	1.36e-07	1.61e-06	7.16989
ACOX2	-1.85808	2.95825	-6.25364	1.69e-07	1.95e-06	7.15002
C6	-2.6475	-1.77535	-6.31098	1.4e-07	1.65e-06	7.1391
ADGRD1	-2.03174	2.498	-6.23908	1.77e-07	2.03e-06	7.13462
DEFB103B	4.65501	-1.07	6.28336	1.53e-07	1.79e-06	7.13345
MTFP1	1.52948	0.566054	6.22867	1.84e-07	2.09e-06	7.1318
LY86	1.51337	0.306304	6.2287	1.84e-07	2.09e-06	7.13092
NTRK2	-1.57237	7.06245	-6.35947	1.19e-07	1.45e-06	7.08296
AKR1B15	2.713	-1.28538	6.25669	1.67e-07	1.93e-06	7.06468
SLC24A4	3.61834	2.39378	6.20228	2e-07	2.23e-06	7.0616
CASQ2	-2.44553	-0.0335795	-6.21764	1.9e-07	2.15e-06	7.05989
F7	-2.05952	0.330656	-6.21222	1.94e-07	2.18e-06	7.0592
SEMA3G	-1.90351	2.59307	-6.21438	1.92e-07	2.17e-06	7.05216
DNAJC5B	2.45961	-2.7927	6.3229	1.34e-07	1.6e-06	7.04639
CELF5	-2.43096	-1.99934	-6.29379	1.48e-07	1.73e-06	7.04629
MMP12	4.02138	-1.53715	6.25932	1.66e-07	1.92e-06	7.02195
DRD1	-1.93139	-2.29299	-6.29655	1.46e-07	1.72e-06	7.01061
HMGCLL1	-2.45489	-2.47925	-6.3003	1.45e-07	1.7e-06	7.00253
SLC6A11	3.20418	0.821851	6.18151	2.15e-07	2.36e-06	6.99151
MAL	-1.88501	4.24177	-6.24254	1.75e-07	2.01e-06	6.98253
LGALS9C	2.7812	-1.0548	6.20107	2.01e-07	2.24e-06	6.92779
PRPH	-2.59491	-0.787628	-6.20267	2e-07	2.23e-06	6.91108
LMO3	-3.47671	-0.731202	-6.20576	1.98e-07	2.22e-06	6.9078
ASIC1	-1.65411	1.41483	-6.15167	2.37e-07	2.56e-06	6.90585
TTPA	-2.31006	0.593145	-6.16026	2.3e-07	2.5e-06	6.90165
AC012066.1	-1.68277	0.771981	-6.14583	2.42e-07	2.6e-06	6.87812
NPFFR2	-1.98071	-0.657543	-6.16891	2.24e-07	2.44e-06	6.86424
RASGEF1C	-2.38671	-0.322869	-6.16144	2.29e-07	2.49e-06	6.86189
TMEM108	-2.89643	3.61975	-6.16093	2.3e-07	2.5e-06	6.85112
ADAMTS14	1.78275	1.85564	6.12846	2.56e-07	2.73e-06	6.82486
TSPAN8	-3.79002	-0.545509	-6.16021	2.3e-07	2.5e-06	6.82198
FCMR	2.37375	2.41497	6.13094	2.54e-07	2.71e-06	6.80779
INMT	-1.79459	2.04833	-6.11751	2.65e-07	2.81e-06	6.77627
DNASE2B	2.79384	-1.54722	6.17287	2.21e-07	2.42e-06	6.76508
CSTA	3.97151	4.57634	6.15514	2.34e-07	2.53e-06	6.76424
BST2	1.50848	5.17727	6.212	1.94e-07	2.18e-06	6.73953
ATRNL1	-2.55531	3.1189	-6.1123	2.7e-07	2.85e-06	6.70345
ADAM33	-1.53393	4.84988	-6.19466	2.05e-07	2.28e-06	6.69636
GALNT13	-1.99637	-0.760773	-6.12471	2.59e-07	2.75e-06	6.69129
GJB1	2.69441	4.54228	6.14266	2.44e-07	2.62e-06	6.67865
SLC26A5	-2.29811	-0.0869239	-6.09723	2.84e-07	2.97e-06	6.67714
CCDC39	-2.80857	0.909221	-6.08077	3e-07	3.1e-06	6.6708
COL25A1	-3.14928	1.39826	-6.07673	3.04e-07	3.14e-06	6.66894
ALKAL2	-2.49326	-0.923671	-6.12007	2.63e-07	2.79e-06	6.66753
AKR1B10	3.97865	0.382361	6.08154	2.99e-07	3.1e-06	6.65718
DCDC1	-1.79329	-0.204617	-6.08526	2.95e-07	3.07e-06	6.63028
LINGO1	1.69379	4.36195	6.1266	2.58e-07	2.74e-06	6.61444
KRT6A	4.13406	7.12382	6.20194	2.01e-07	2.24e-06	6.60969
DCDC2C	-2.1314	-2.82538	-6.18885	2.09e-07	2.31e-06	6.60417
PTPN5	-2.21935	-1.01983	-6.08982	2.91e-07	3.04e-06	6.60119
FGF14	-3.73846	0.966635	-6.06161	3.2e-07	3.28e-06	6.59749
LOX	-1.54542	4.95548	-6.1585	2.32e-07	2.51e-06	6.59395
EN2	2.38151	1.64422	6.05203	3.3e-07	3.37e-06	6.5917
GCH1	1.57336	3.2368	6.0873	2.93e-07	3.05e-06	6.59156
TNMD	-2.69891	-2.08146	-6.14573	2.42e-07	2.6e-06	6.58651
WNT10A	2.00902	1.73159	6.05011	3.32e-07	3.39e-06	6.57907
LCE3E	5.34127	0.385291	6.05184	3.3e-07	3.37e-06	6.54847
MYOC	-3.17476	-1.51332	-6.09539	2.86e-07	2.99e-06	6.54399
COL9A3	-2.36293	3.44548	-6.07045	3.1e-07	3.2e-06	6.54101
CYP4B1	-2.74106	1.09721	-6.03306	3.51e-07	3.55e-06	6.53177
IGDCC3	-2.0179	-1.30583	-6.08883	2.92e-07	3.04e-06	6.52702
ALX4	-2.29162	0.586972	-6.03196	3.53e-07	3.55e-06	6.51226
PTCH2	-1.7482	3.60378	-6.08071	3e-07	3.1e-06	6.50982
SLC7A11	3.25848	2.29206	6.02497	3.61e-07	3.62e-06	6.50481
NUAK2	2.05636	2.15202	6.02656	3.59e-07	3.6e-06	6.49295
FLRT1	-2.38229	2.60334	-6.01665	3.71e-07	3.7e-06	6.44907
DRD2	-1.94249	-0.31277	-6.02812	3.57e-07	3.59e-06	6.44419
TMEM54	1.53381	3.77103	6.05863	3.23e-07	3.31e-06	6.44006
MEOX2	-1.61497	3.13827	-6.04205	3.41e-07	3.47e-06	6.43917
SERPINA5	-2.76705	1.03793	-5.99646	3.97e-07	3.91e-06	6.41592
AC108734.3	-2.38315	-2.45771	-6.09194	2.89e-07	3.02e-06	6.40563
RBM24	-1.77797	-1.41112	-6.04081	3.42e-07	3.48e-06	6.40104
MC1R	1.8421	1.82264	5.99215	4.02e-07	3.95e-06	6.39781
PLA2G3	3.64881	-0.0378553	6.00105	3.91e-07	3.87e-06	6.39157
OR4F28P	3.04502	0.109701	5.99226	4.02e-07	3.95e-06	6.36023
TNPO1P3	3.26644	-1.51527	6.02853	3.57e-07	3.59e-06	6.35692
ADAMTS3	-1.64377	2.93372	-6.00012	3.92e-07	3.88e-06	6.34837
SLC24A2	-2.75885	-0.877174	-6.02061	3.66e-07	3.66e-06	6.32924
FRZB	-2.65283	3.66736	-5.99685	3.96e-07	3.91e-06	6.32416
GPR27	-1.93956	0.637628	-5.96828	4.36e-07	4.22e-06	6.32188
FLJ16779	-2.20248	-1.56412	-6.03098	3.54e-07	3.56e-06	6.30707
FABP3	1.67113	1.39273	5.9601	4.48e-07	4.3e-06	6.30186
PACRG	-1.53807	-0.684602	-5.98008	4.19e-07	4.09e-06	6.28307
GFRA1	-1.8585	3.64146	-6.00751	3.82e-07	3.8e-06	6.26369
DCAF12L2	-1.99076	-1.53106	-6.00456	3.86e-07	3.83e-06	6.25627
IFNLR1	1.5739	2.00146	5.94941	4.64e-07	4.42e-06	6.2502
LAMP3	2.4247	3.12533	5.97186	4.3e-07	4.17e-06	6.24914
GRIN2C	-1.68456	-0.279055	-5.95322	4.58e-07	4.37e-06	6.22423
ICOS	2.15801	0.867652	5.92381	5.05e-07	4.75e-06	6.18842
TNNI3K	-1.8489	-0.468992	-5.95343	4.58e-07	4.37e-06	6.17739
PLD5	-2.66279	-1.51143	-5.99584	3.98e-07	3.92e-06	6.17339
IL4I1	2.31363	2.6597	5.92879	4.97e-07	4.68e-06	6.15683
FNDC5	-2.89169	-1.6235	-5.97318	4.29e-07	4.16e-06	6.1533
FCGR3A	2.7754	2.37148	5.92056	5.1e-07	4.79e-06	6.14883
ASXL3	-2.6346	0.280231	-5.915	5.2e-07	4.88e-06	6.14165
SORCS3	-2.43111	-1.5185	-5.95701	4.52e-07	4.32e-06	6.13689
AREG	3.22715	0.843972	5.90764	5.33e-07	4.98e-06	6.12811
CCDC194	2.07005	-1.88063	5.96494	4.4e-07	4.25e-06	6.11801
GAPDHP71	-2.15994	-2.41476	-5.9925	4.02e-07	3.95e-06	6.11696
FUT2	2.29532	0.216071	5.90292	5.41e-07	5.06e-06	6.10799
SPDYA	2.35889	0.28885	5.90284	5.41e-07	5.06e-06	6.09806
BRAFP1	-2.29291	-2.39666	-5.97583	4.25e-07	4.13e-06	6.09019
AC009955.4	-1.98174	-2.1509	-5.97669	4.24e-07	4.12e-06	6.07475
GLB1L3	2.89881	0.738916	5.88803	5.68e-07	5.27e-06	6.06991
IDI2-AS1	-1.52789	2.49911	-5.89181	5.61e-07	5.21e-06	6.04408
GBP6	3.49434	1.43183	5.8772	5.89e-07	5.42e-06	6.04112
XPNPEP2	-1.82612	2.61336	-5.8862	5.72e-07	5.29e-06	6.00885
SLC4A11	1.86944	3.02062	5.89376	5.58e-07	5.19e-06	6.00797
DACT1	-1.68816	3.10244	-5.89859	5.49e-07	5.12e-06	6.00017
SERPINB2	4.38251	1.83174	5.8595	6.25e-07	5.69e-06	5.98582
CARD14	2.45896	2.37809	5.86447	6.15e-07	5.62e-06	5.97331
SCN2B	-2.34861	-2.1697	-5.92415	5.04e-07	4.74e-06	5.94804
FMN2	-2.22346	0.269594	-5.84934	6.46e-07	5.85e-06	5.93536
KCND2	-2.56434	-0.474086	-5.85149	6.42e-07	5.82e-06	5.90678
EREG	3.29909	0.0213307	5.84304	6.6e-07	5.95e-06	5.90226
PDZRN4	-2.3733	0.559612	-5.83114	6.86e-07	6.13e-06	5.89228
HSPB8	1.51782	3.41338	5.87223	5.99e-07	5.5e-06	5.88375
PEX5L	-4.27865	-0.525629	-5.86597	6.12e-07	5.6e-06	5.87878
SVEP1	-1.62205	7.17982	-5.99096	4.04e-07	3.96e-06	5.86026
PLIN1	-2.41732	-0.654794	-5.84055	6.65e-07	5.98e-06	5.84512
CXCR2	2.12488	0.767792	5.80189	7.56e-07	6.66e-06	5.80563
PRDM16	-2.06117	1.41004	-5.79911	7.63e-07	6.72e-06	5.79284
PABPC1P4	-1.85086	-0.643466	-5.81244	7.3e-07	6.47e-06	5.77095
NRIP2	-1.866	0.194217	-5.79403	7.76e-07	6.81e-06	5.7701
CBX1P1	-1.62475	-2.0883	-5.86055	6.23e-07	5.67e-06	5.76951
KRT34	2.75013	-2.47416	5.85694	6.3e-07	5.73e-06	5.74423
MAATS1	-2.3811	1.53657	-5.78273	8.06e-07	7.02e-06	5.74073
B4GALNT3	1.69392	3.80545	5.83297	6.82e-07	6.11e-06	5.72364
HIST1H3G	1.8393	2.14959	5.78619	7.97e-07	6.95e-06	5.72169
FABP7	-2.42909	4.55934	-5.85792	6.28e-07	5.71e-06	5.72107
SYPL2	-1.63	-0.232845	-5.7848	8e-07	6.98e-06	5.71755
CPAMD8	-2.13033	0.657281	-5.77231	8.34e-07	7.25e-06	5.71125
GH1	-1.81872	-3.14488	-5.87639	5.91e-07	5.44e-06	5.68283
SYN2	-2.49961	1.77208	-5.76928	8.42e-07	7.31e-06	5.68213
SCML4	2.36588	2.26955	5.77611	8.24e-07	7.16e-06	5.67179
FAM25C	3.56921	-1.33662	5.79163	7.82e-07	6.86e-06	5.65872
MMP1	4.94958	0.386242	5.76235	8.62e-07	7.45e-06	5.65022
BMP8A	2.33202	-0.378165	5.76293	8.6e-07	7.45e-06	5.63255
CYP4X1	-1.56552	1.46088	-5.75002	8.98e-07	7.71e-06	5.63114
RASEF	2.57262	2.22167	5.75557	8.82e-07	7.59e-06	5.62985
TXK	1.69343	1.63179	5.74174	9.23e-07	7.88e-06	5.60313
SPC25	1.54501	0.957057	5.73485	9.44e-07	8.03e-06	5.59651
C7	-3.06249	1.87205	-5.74007	9.28e-07	7.91e-06	5.58614
LYPD3	2.84174	5.61267	5.85927	6.25e-07	5.69e-06	5.57554
IFFO2	1.53994	5.04647	5.84145	6.63e-07	5.97e-06	5.55113
OR51B2	-1.82233	-1.65675	-5.7592	8.71e-07	7.52e-06	5.53475
GPR37	-1.67232	5.18118	-5.84039	6.66e-07	5.99e-06	5.53205
DNAAF3	1.67333	-1.15486	5.73974	9.29e-07	7.92e-06	5.52362
AC079594.2	2.39611	2.29878	5.71545	1.01e-06	8.47e-06	5.5174
GFRA3	-3.22141	1.41765	-5.70363	1.05e-06	8.74e-06	5.49758
APOBEC3A	3.05287	-0.844505	5.71669	1e-06	8.44e-06	5.4738
FYB	1.52954	5.59837	5.83002	6.89e-07	6.15e-06	5.44216
AVPR2	-2.04795	-0.441604	-5.69814	1.07e-06	8.88e-06	5.43821
KBTBD12	-2.12284	-1.39679	-5.71317	1.01e-06	8.52e-06	5.42828
NMU	3.51645	-0.995727	5.70427	1.04e-06	8.73e-06	5.42791
SLCO1C1	-1.99821	1.3662	-5.67934	1.13e-06	9.38e-06	5.41453
PRAME	4.16693	4.72949	5.72956	9.61e-07	8.15e-06	5.41188
SLC5A10	-2.53945	3.26842	-5.70486	1.04e-06	8.73e-06	5.40802
C2orf88	-1.59688	3.86014	-5.71946	9.94e-07	8.38e-06	5.33533
TNF	1.67973	1.70262	5.6529	1.24e-06	1.01e-05	5.32069
AC107976.1	-1.7708	-2.46328	-5.7184	9.97e-07	8.4e-06	5.30021
LYPD5	2.47665	2.11731	5.64409	1.27e-06	1.04e-05	5.28321
CSDC2	-2.51182	-2.84633	-5.72726	9.68e-07	8.2e-06	5.27285
SLAMF7	2.19843	2.42302	5.64945	1.25e-06	1.02e-05	5.26713
OR4F15	2.70141	0.222268	5.63113	1.33e-06	1.08e-05	5.26361
TMEFF2	-3.01763	-0.63987	-5.64219	1.28e-06	1.04e-05	5.25283
AC100793.2	-1.60165	-0.14281	-5.63201	1.33e-06	1.08e-05	5.25046
GDF10	-2.68095	2.06355	-5.62378	1.36e-06	1.1e-05	5.22342
FOXD2	-1.56876	2.43636	-5.62859	1.34e-06	1.08e-05	5.21258
C1GALT1P2	-1.98973	-2.67603	-5.70131	1.06e-06	8.8e-06	5.21164
MMP8	3.30468	-2.12369	5.6639	1.19e-06	9.81e-06	5.19765
LYPD6	-1.90772	1.16734	-5.60686	1.44e-06	1.16e-05	5.19736
INA	3.04151	-1.46089	5.6371	1.3e-06	1.06e-05	5.19507
PROC	1.55791	-1.5394	5.63234	1.33e-06	1.08e-05	5.19483
AGAP11	-1.53995	2.82138	-5.63704	1.3e-06	1.06e-05	5.19343
SLC2A5	1.73268	0.856034	5.60311	1.46e-06	1.17e-05	5.18559
AL590666.2	-2.08769	-1.15436	-5.63087	1.33e-06	1.08e-05	5.17884
DLX1	2.59062	-1.00456	5.62247	1.37e-06	1.1e-05	5.17776
NDUFA4L2	1.78963	2.8239	5.62916	1.34e-06	1.08e-05	5.16765
WNT7A	2.37816	-1.0323	5.61057	1.42e-06	1.14e-05	5.1495
MYH11	-3.48255	5.33306	-5.71718	1e-06	8.43e-06	5.14374
CXCR4	1.91193	3.88005	5.65887	1.21e-06	9.95e-06	5.14125
AC004987.2	-1.77726	-2.70693	-5.66811	1.18e-06	9.7e-06	5.13926
ZNF300P1	-1.81484	-0.489001	-5.59556	1.5e-06	1.19e-05	5.12621
S100A7A	4.78369	-0.828021	5.5984	1.48e-06	1.18e-05	5.11581
ZSCAN23	-1.62041	1.77521	-5.58558	1.55e-06	1.23e-05	5.11245
ITGB6	2.85279	1.45107	5.58439	1.55e-06	1.23e-05	5.11243
ADAM23	-1.99684	5.702	-5.72109	9.88e-07	8.35e-06	5.10561
ATP4A	-2.07551	-2.22816	-5.63118	1.33e-06	1.08e-05	5.10414
S100A7	6.7383	3.70874	5.58365	1.56e-06	1.23e-05	5.08355
CRABP2	1.71308	4.8544	5.69176	1.09e-06	9.06e-06	5.08284
OPRD1	2.61157	-2.28702	5.62943	1.34e-06	1.08e-05	5.07731
EXO1	1.6167	2.79134	5.59296	1.51e-06	1.2e-05	5.07688
AC005833.1	-1.8003	0.366249	-5.56768	1.64e-06	1.29e-05	5.07556
STXBP5L	-3.58938	-2.14623	-5.62651	1.35e-06	1.09e-05	5.05966
PIFO	-1.53752	-0.390848	-5.57373	1.61e-06	1.27e-05	5.05723
ZNF365	1.84506	3.73578	5.6124	1.42e-06	1.14e-05	5.04849
TF	-1.88022	2.85651	-5.59376	1.51e-06	1.2e-05	5.04145
TGM1	2.77914	3.90794	5.61471	1.4e-06	1.13e-05	5.02136
FCGR1A	2.21031	1.52987	5.54754	1.75e-06	1.36e-05	4.99668
LCE3D	6.28988	1.03338	5.54204	1.79e-06	1.38e-05	4.98786
IL36B	3.36869	-0.768232	5.54902	1.75e-06	1.36e-05	4.9721
NKAIN3	-2.50451	1.16375	-5.53226	1.84e-06	1.42e-05	4.96315
GLI1	-2.00718	2.74976	-5.55717	1.7e-06	1.33e-05	4.94094
TLE2	-1.52885	3.67181	-5.59732	1.49e-06	1.18e-05	4.93429
WFDC12	5.52528	-0.211353	5.53504	1.83e-06	1.41e-05	4.92749
PCLAF	1.94258	-0.575244	5.53026	1.86e-06	1.43e-05	4.92405
ZNF728	-2.49288	-1.04511	-5.53988	1.8e-06	1.39e-05	4.92256
IGFN1	-2.97825	3.81829	-5.5791	1.58e-06	1.25e-05	4.91831
KCNB1	-1.81405	-0.712919	-5.52589	1.88e-06	1.44e-05	4.9149
HEPHL1	4.68459	0.267893	5.51698	1.94e-06	1.48e-05	4.91256
ABCC2	2.75867	4.04449	5.56721	1.64e-06	1.29e-05	4.88312
SLC1A4	1.57183	5.38545	5.63613	1.31e-06	1.06e-05	4.87242
KRT6C	5.97642	3.68709	5.52456	1.89e-06	1.45e-05	4.8638
PTN	-3.09404	4.91499	-5.59973	1.48e-06	1.18e-05	4.85008
ETV7	1.77336	2.30541	5.51496	1.95e-06	1.49e-05	4.84763
NR1I2	-1.88681	-0.415416	-5.50118	2.04e-06	1.54e-05	4.83865
HOXC11	2.07196	-0.52924	5.49362	2.1e-06	1.57e-05	4.82495
SEZ6L2	1.70804	3.08944	5.52501	1.89e-06	1.45e-05	4.82138
FOXS1	-1.89949	0.863066	-5.48146	2.18e-06	1.63e-05	4.80796
PDE6G	-1.68111	0.0226973	-5.47941	2.2e-06	1.63e-05	4.79475
PRSS3	4.22656	0.726942	5.47038	2.26e-06	1.67e-05	4.77418
CHRNA1	2.62301	-1.37867	5.49391	2.09e-06	1.57e-05	4.77288
PRG4	-3.49992	2.22505	-5.4792	2.2e-06	1.63e-05	4.76396
NEU2	3.41878	-0.44118	5.47323	2.24e-06	1.66e-05	4.76243
HPDL	-1.98824	2.39836	-5.47986	2.19e-06	1.63e-05	4.7404
HAS3	1.58937	4.1938	5.55832	1.69e-06	1.32e-05	4.73968
FHL5	-2.51814	-0.208102	-5.45454	2.38e-06	1.75e-05	4.71431
TEKT2	-1.68775	-1.06791	-5.46993	2.27e-06	1.67e-05	4.70649
RGS22	-1.57496	1.91427	-5.46137	2.33e-06	1.71e-05	4.69748
ST14	2.02772	4.7451	5.56282	1.67e-06	1.31e-05	4.6919
IGFBP5	-1.76679	5.45825	-5.60268	1.46e-06	1.17e-05	4.68302
HSPB7	-1.74714	0.153884	-5.44378	2.47e-06	1.8e-05	4.68125
KRT6B	4.00833	5.99741	5.57662	1.59e-06	1.26e-05	4.66036
NCAM2	-1.50173	4.07977	-5.52469	1.89e-06	1.45e-05	4.65956
LAMC2	2.63303	4.25092	5.52645	1.88e-06	1.44e-05	4.65658
S100A12	2.68246	-2.55404	5.47154	2.25e-06	1.67e-05	4.62448
C6orf15	2.27947	-2.66076	5.47919	2.2e-06	1.63e-05	4.61941
PCDHB5	-1.94217	1.85489	-5.42352	2.64e-06	1.91e-05	4.61117
SPON1	-1.58764	5.7356	-5.57347	1.61e-06	1.27e-05	4.58704
CNN1	-3.26527	0.511777	-5.40924	2.77e-06	1.99e-05	4.58457
RNF222	2.4084	-1.32217	5.42275	2.65e-06	1.92e-05	4.57799
KLK13	4.21419	1.28602	5.40877	2.77e-06	1.99e-05	4.57414
SERPINB3	6.60837	2.93491	5.40872	2.77e-06	1.99e-05	4.56233
FABP4	-2.19447	0.53695	-5.39834	2.87e-06	2.05e-05	4.55162
CPZ	-1.60225	3.5187	-5.47402	2.24e-06	1.65e-05	4.54443
PDE1C	-3.55285	2.40274	-5.40865	2.77e-06	1.99e-05	4.54083
CNFN	5.11025	2.42118	5.39911	2.86e-06	2.04e-05	4.52829
EPHA7	-1.85602	-0.117323	-5.38752	2.97e-06	2.11e-05	4.51577
TRIM61	-1.89201	-1.85681	-5.43121	2.57e-06	1.87e-05	4.51526
PCOLCE2	-1.7159	0.897382	-5.38396	3.01e-06	2.13e-05	4.50396
KRT16P5	2.40915	-2.32824	5.42162	2.66e-06	1.92e-05	4.48966
RPS10P2	-2.12415	-1.89888	-5.41542	2.71e-06	1.95e-05	4.48948
FBN3	-1.9545	-1.38029	-5.39612	2.89e-06	2.06e-05	4.48814
PYDC1	3.13819	-1.48014	5.39584	2.89e-06	2.06e-05	4.47726
HKDC1	-4.07198	3.76724	-5.41288	2.73e-06	1.97e-05	4.45803
LRRC18	-1.55064	-1.32503	-5.38633	2.98e-06	2.11e-05	4.44758
ART3	-3.32412	1.10732	-5.36409	3.21e-06	2.25e-05	4.44492
PMEL	1.5816	9.05348	5.56893	1.63e-06	1.28e-05	4.44228
CCDC151	-1.55181	-0.653288	-5.37221	3.13e-06	2.2e-05	4.4422
WWC1	1.85735	3.90907	5.43546	2.54e-06	1.85e-05	4.4312
CYP4A22	-2.14861	-1.59763	-5.3786	3.06e-06	2.16e-05	4.40873
SPTB	-1.5295	1.57171	-5.36025	3.25e-06	2.27e-05	4.40051
CCL18	2.88688	2.42293	5.37158	3.13e-06	2.2e-05	4.39517
GREM2	-1.88601	-0.237237	-5.34553	3.41e-06	2.37e-05	4.38163
CDCA7	1.506	2.358	5.37036	3.14e-06	2.21e-05	4.37938
RNF225	2.69698	0.0817871	5.33837	3.49e-06	2.42e-05	4.36642
CLIC3	2.1341	1.73709	5.34927	3.37e-06	2.35e-05	4.35708
LCE1E	3.76685	-0.400533	5.32393	3.66e-06	2.52e-05	4.30966
TNFRSF13C	1.77914	-0.182503	5.31835	3.73e-06	2.56e-05	4.29482
TMEM45B	3.92458	1.13339	5.31326	3.79e-06	2.6e-05	4.28414
SCRG1	-3.70671	1.42194	-5.31104	3.82e-06	2.62e-05	4.28112
ACCSL	-1.87343	2.03718	-5.3241	3.66e-06	2.52e-05	4.27807
AC007560.1	-1.98135	-3.43335	-5.39561	2.89e-06	2.06e-05	4.27512
COL6A5	3.55214	3.53815	5.34923	3.37e-06	2.35e-05	4.25831
AC107977.1	2.15153	-2.24446	5.34071	3.47e-06	2.4e-05	4.25405
PGR	-1.53508	1.83177	-5.31415	3.78e-06	2.6e-05	4.24353
MSI1	-2.30387	0.284194	-5.29823	3.99e-06	2.71e-05	4.24269
MMP3	3.25057	-0.259076	5.29918	3.97e-06	2.7e-05	4.23568
PITX1	2.57771	-0.519745	5.2994	3.97e-06	2.7e-05	4.23548
AC007563.2	-2.22607	-2.64992	-5.33938	3.48e-06	2.41e-05	4.22509
IGFBP6	-1.81725	2.48224	-5.32559	3.64e-06	2.51e-05	4.22183
CXCL1	2.41403	0.143016	5.28873	4.11e-06	2.78e-05	4.21497
CHRNA9	3.29252	-0.556786	5.28759	4.13e-06	2.79e-05	4.1978
SLC6A20	-1.994	-0.904755	-5.28878	4.11e-06	2.78e-05	4.19069
NMUR1	-1.89226	-0.905971	-5.29179	4.07e-06	2.76e-05	4.18857
SPHKAP	-3.89832	-0.566845	-5.28651	4.14e-06	2.8e-05	4.18022
TNFRSF9	2.13059	0.433313	5.27755	4.27e-06	2.87e-05	4.18021
SLC28A3	2.57027	2.15154	5.29343	4.05e-06	2.75e-05	4.17546
ADAMTS8	-1.55137	1.29101	-5.28193	4.2e-06	2.84e-05	4.17174
CXCL2	1.63014	0.433369	5.27119	4.36e-06	2.91e-05	4.1607
DCX	-4.40725	-0.0370688	-5.27587	4.29e-06	2.88e-05	4.14896
FSTL5	2.996	-0.137	5.26982	4.37e-06	2.92e-05	4.14874
PRRT4	-1.83233	1.786	-5.27517	4.3e-06	2.88e-05	4.14138
NECTIN1	1.76856	7.39248	5.46341	2.31e-06	1.7e-05	4.13154
SPRR2B	4.41264	-0.434947	5.26529	4.44e-06	2.96e-05	4.12756
TRHDE	-2.20505	0.746426	-5.2593	4.53e-06	3.01e-05	4.1183
CAMK1G	1.71462	-2.71752	5.30727	3.87e-06	2.64e-05	4.11309
KIR2DL4	2.29874	-2.05842	5.28176	4.21e-06	2.84e-05	4.10915
RBP1	2.08094	1.83489	5.2701	4.37e-06	2.92e-05	4.10558
MPZL2	2.20009	2.96135	5.30275	3.93e-06	2.68e-05	4.1028
SERPINB4	6.81986	1.40347	5.24769	4.7e-06	3.11e-05	4.08925
CDRT1	1.67086	1.54685	5.25724	4.56e-06	3.03e-05	4.08272
EBF2	-1.98533	1.0846	-5.24916	4.68e-06	3.1e-05	4.0817
DACT2	-2.15152	2.23506	-5.26656	4.42e-06	2.95e-05	4.0733
SERPINB7	5.97279	1.57376	5.24089	4.81e-06	3.17e-05	4.06575
AC068587.6	-2.15293	2.50169	-5.26807	4.4e-06	2.93e-05	4.05831
XCL1	1.79189	0.20673	5.22875	5.01e-06	3.27e-05	4.03139
WISP2	-1.51487	4.76121	-5.36379	3.21e-06	2.25e-05	4.00048
PCDH19	-1.55854	1.74126	-5.23432	4.91e-06	3.22e-05	3.99929
IL1RN	2.42938	2.14848	5.23897	4.84e-06	3.18e-05	3.99277
S100A2	3.39076	3.95043	5.29466	4.03e-06	2.74e-05	3.98992
SLC34A1	1.76646	-1.45649	5.23161	4.96e-06	3.24e-05	3.98732
HAL	4.45673	2.86079	5.23718	4.87e-06	3.2e-05	3.98596
MROH7-TTC4	-1.83183	2.02871	-5.23468	4.91e-06	3.22e-05	3.98573
CRHR1	-1.79782	-2.38955	-5.25241	4.63e-06	3.07e-05	3.98074
HRCT1	-1.5848	-0.792524	-5.21389	5.26e-06	3.41e-05	3.97245
CLSTN2	-1.70996	1.53561	-5.21207	5.29e-06	3.43e-05	3.94188
RGR	-2.65991	-0.840572	-5.20477	5.41e-06	3.5e-05	3.92416
SDR9C7	3.60935	0.729228	5.1881	5.72e-06	3.66e-05	3.90241
CHIT1	5.07183	0.432809	5.18096	5.85e-06	3.72e-05	3.88495
AC007952.1	-1.95782	-2.6966	-5.23252	4.94e-06	3.24e-05	3.8839
GABRB1	-3.12869	-1.42582	-5.20304	5.45e-06	3.52e-05	3.88164
CCL4	2.2201	0.899404	5.18407	5.79e-06	3.7e-05	3.88006
TREX2	1.64706	2.70514	5.21864	5.17e-06	3.37e-05	3.87544
IL5RA	-2.403	-0.196979	-5.17847	5.9e-06	3.75e-05	3.87323
ARL14	2.17528	-2.45732	5.21817	5.18e-06	3.37e-05	3.87071
CXCR2P1	2.72301	-1.46941	5.18766	5.73e-06	3.66e-05	3.86791
CDH12	-2.15794	-0.682484	-5.18035	5.86e-06	3.73e-05	3.86786
IGFL3	3.45786	-1.30059	5.18703	5.74e-06	3.67e-05	3.86186
TNC	1.61459	8.91731	5.38626	2.98e-06	2.11e-05	3.85364
HPSE	1.69296	2.4644	5.20001	5.5e-06	3.55e-05	3.8279
COL11A1	-2.81244	3.61993	-5.19951	5.51e-06	3.55e-05	3.81237
DCC	-2.30569	-1.1098	-5.16439	6.18e-06	3.9e-05	3.79342
CCDC68	-2.32372	0.706977	-5.15046	6.47e-06	4.06e-05	3.78608
ALDH7A1P1	-2.07168	-2.25323	-5.18202	5.83e-06	3.71e-05	3.78589
C1QB	1.64241	5.26937	5.31317	3.79e-06	2.6e-05	3.78582
MPZL3	2.0744	2.48673	5.18095	5.85e-06	3.72e-05	3.77507
GRID2	-2.37946	-2.55635	-5.18343	5.81e-06	3.7e-05	3.76347
AC107918.1	2.64646	-1.70395	5.16623	6.14e-06	3.89e-05	3.76176
RPS10P28	-1.52625	-1.43848	-5.15313	6.41e-06	4.03e-05	3.75702
UCN2	2.44424	0.430335	5.13732	6.75e-06	4.2e-05	3.7523
IFNE	2.26005	-2.2701	5.16182	6.23e-06	3.93e-05	3.74141
HS3ST2	2.29534	1.73235	5.15015	6.47e-06	4.06e-05	3.73387
NKAIN2	-2.50221	-3.406	-5.1941	5.61e-06	3.61e-05	3.72318
FFAR4	1.69257	-0.547004	5.12696	6.98e-06	4.32e-05	3.71757
GRIK3	-3.68648	2.82723	-5.14718	6.54e-06	4.09e-05	3.71313
ACSS3	-1.86095	3.25377	-5.19601	5.57e-06	3.59e-05	3.70856
CXCR1	1.79569	-1.08568	5.1287	6.94e-06	4.3e-05	3.70457
CEMIP	2.24866	3.34152	5.17718	5.93e-06	3.76e-05	3.70355
PLA2G5	-2.13398	-2.07182	-5.14844	6.51e-06	4.08e-05	3.69401
MMP9	2.28543	4.05459	5.21187	5.29e-06	3.43e-05	3.6919
HCAR2	2.23088	1.64764	5.13167	6.88e-06	4.27e-05	3.68861
AL136531.2	1.55216	-1.31143	5.12168	7.1e-06	4.38e-05	3.67088
ADORA3	1.84619	1.91447	5.12869	6.94e-06	4.3e-05	3.65853
P2RY2	1.90963	2.18707	5.13427	6.82e-06	4.24e-05	3.65693
CD7	1.97099	1.25716	5.11793	7.19e-06	4.43e-05	3.6548
PGLYRP2	1.69215	-2.23767	5.12597	7.01e-06	4.33e-05	3.64823
SERPINE1	1.87909	3.14444	5.14304	6.63e-06	4.14e-05	3.61211
PLN	-3.12197	-1.32084	-5.10534	7.49e-06	4.58e-05	3.60955
SH2D2A	1.8745	1.59961	5.10939	7.4e-06	4.53e-05	3.60949
KIRREL3	-1.81356	-0.0263383	-5.08669	7.96e-06	4.83e-05	3.59908
GPC3	-3.02887	1.87875	-5.09565	7.73e-06	4.71e-05	3.58867
ABHD12B	-1.84522	3.19515	-5.14387	6.61e-06	4.13e-05	3.5535
KCNA1	-2.59773	-1.77087	-5.08839	7.92e-06	4.81e-05	3.54151
HHATL	-5.84245	3.95399	-5.10715	7.45e-06	4.56e-05	3.529
ZNF534	-1.68669	-0.636075	-5.06509	8.55e-06	5.13e-05	3.52108
C15orf48	2.83579	1.16892	5.06564	8.53e-06	5.12e-05	3.51816
TLR10	2.03607	1.49435	5.06692	8.49e-06	5.1e-05	3.49444
KIAA1644	1.66418	-0.0373042	5.0508	8.95e-06	5.33e-05	3.49041
DERL3	1.7782	2.26852	5.08697	7.96e-06	4.83e-05	3.48858
TGFB2	-1.51743	4.0338	-5.14814	6.52e-06	4.08e-05	3.4855
MYOCD	-3.08667	0.369562	-5.04522	9.12e-06	5.42e-05	3.47268
PADI1	4.30408	1.10088	5.04611	9.09e-06	5.41e-05	3.46341
ASGR2	1.51652	0.155674	5.04034	9.26e-06	5.49e-05	3.45816
CCNO	1.64632	0.0577112	5.03725	9.36e-06	5.53e-05	3.44939
TNNT1	2.96544	-0.661599	5.03985	9.28e-06	5.49e-05	3.4487
GAL3ST1	-1.66355	-0.880361	-5.04282	9.19e-06	5.46e-05	3.44763
LCE1D	3.73025	-0.461128	5.03557	9.41e-06	5.56e-05	3.44216
FGF7	-1.77816	2.99513	-5.09219	7.82e-06	4.76e-05	3.44032
LILRA4	2.40355	0.297432	5.03319	9.48e-06	5.59e-05	3.4327
MCHR1	3.01899	0.284666	5.03007	9.58e-06	5.64e-05	3.42764
AC020907.2	-3.81064	-0.32408	-5.03092	9.55e-06	5.63e-05	3.41903
AL133346.1	-1.54404	-1.08614	-5.01646	1e-05	5.85e-05	3.36129
TCF23	-1.96591	-2.76637	-5.04364	9.16e-06	5.44e-05	3.36038
SLC5A7	-3.06245	-2.56084	-5.04502	9.12e-06	5.42e-05	3.35928
SMCO2	1.63226	-1.68545	5.02282	9.81e-06	5.75e-05	3.35907
TSGA10IP	-1.85157	-0.132776	-5.00475	1.04e-05	6.05e-05	3.34857
MRGPRX2	-2.5236	0.195251	-5.00393	1.04e-05	6.06e-05	3.34717
SPRR1A	5.42803	1.68743	5.00869	1.03e-05	5.99e-05	3.33843
PNCK	-1.69512	-0.0160394	-4.99847	1.06e-05	6.15e-05	3.33187
LCE1F	3.8021	-0.521294	4.99833	1.06e-05	6.15e-05	3.32552
CGN	1.50215	3.15517	5.05644	8.79e-06	5.25e-05	3.32364
C9orf84	2.7699	0.202391	4.99559	1.07e-05	6.19e-05	3.32196
KCNJ18	2.7713	-0.665705	4.99653	1.07e-05	6.18e-05	3.32127
CYTIP	1.52996	3.38337	5.07474	8.28e-06	4.99e-05	3.32048
NKAIN4	-2.30069	-0.441058	-4.99457	1.07e-05	6.21e-05	3.31495
AC091492.1	-1.95495	-1.90405	-5.01206	1.02e-05	5.92e-05	3.30829
IL1F10	2.21521	-2.86401	5.01907	9.93e-06	5.81e-05	3.27977
NTRK1	1.59962	-1.36563	4.98787	1.1e-05	6.33e-05	3.2763
VGLL2	-2.22541	-2.74511	-5.01416	1.01e-05	5.88e-05	3.26296
ACVR1C	1.99807	-0.466187	4.97261	1.15e-05	6.6e-05	3.24983
CDA	2.07383	0.671049	4.97559	1.14e-05	6.54e-05	3.24867
ASB11	-3.11436	1.22726	-4.9711	1.16e-05	6.62e-05	3.23313
CXCL11	2.91283	-1.62725	4.97189	1.16e-05	6.61e-05	3.22206
DPY19L2	-1.50942	5.26467	-5.13325	6.84e-06	4.25e-05	3.20324
NPY1R	-2.37241	0.133652	-4.9556	1.22e-05	6.92e-05	3.20247
TERT	1.91999	-1.58387	4.96462	1.18e-05	6.75e-05	3.19677
DLX2	2.10125	-1.86157	4.97017	1.16e-05	6.64e-05	3.19152
CD24	3.07886	2.48622	4.98762	1.1e-05	6.33e-05	3.18685
LGI1	-1.93186	-1.72175	-4.95413	1.23e-05	6.95e-05	3.16034
LMOD1	-1.9291	3.15581	-5.01681	1e-05	5.84e-05	3.15518
ABCA12	3.51936	5.62011	5.10103	7.6e-06	4.64e-05	3.15501
LMX1A	-2.24497	-3.11596	-4.98244	1.12e-05	6.43e-05	3.15094
DCSTAMP	2.17438	-1.61612	4.94594	1.26e-05	7.11e-05	3.14242
LPAR3	2.27032	1.30849	4.94675	1.26e-05	7.09e-05	3.13614
GSDMC	3.6413	2.28606	4.95548	1.22e-05	6.92e-05	3.11096
KLK8	3.79784	1.87055	4.93996	1.28e-05	7.23e-05	3.09705
HAPLN1	-2.21496	-1.62158	-4.93066	1.32e-05	7.41e-05	3.09231
HOXD13	2.28314	-2.34475	4.93735	1.29e-05	7.28e-05	3.08906
TMEM79	1.73532	4.10402	5.02344	9.79e-06	5.74e-05	3.06103
CREG2	1.9278	-2.65946	4.94007	1.28e-05	7.23e-05	3.0598
TCEAL7	-2.03703	-2.05803	-4.92539	1.35e-05	7.52e-05	3.05739
LRRTM3	-1.98322	-3.0105	-4.9454	1.26e-05	7.12e-05	3.05001
CTNND2	-2.32143	-0.214905	-4.90382	1.44e-05	7.97e-05	3.04777
VGF	2.7067	-0.994852	4.90628	1.43e-05	7.92e-05	3.03198
SCG2	1.95117	1.39657	4.90702	1.43e-05	7.91e-05	3.02706
SBSPON	-2.42921	-0.285877	-4.89455	1.49e-05	8.18e-05	3.02033
GABRA2	-2.35191	-1.1426	-4.89996	1.46e-05	8.05e-05	3.01478
AQP7	-1.50297	-0.284111	-4.89245	1.5e-05	8.21e-05	3.01423
SLC6A17	2.86982	2.93161	4.93621	1.3e-05	7.3e-05	3.00698
IFI44L	1.50383	5.3051	5.06504	8.55e-06	5.13e-05	3.00504
AC129492.3	-2.21305	2.19238	-4.91374	1.4e-05	7.77e-05	3.00259
AC067945.1	1.70316	0.200659	4.88866	1.52e-05	8.3e-05	2.99662
PGLYRP4	3.00984	0.839081	4.89228	1.5e-05	8.21e-05	2.99133
ADAMTSL1	-1.59473	3.19945	-4.97285	1.15e-05	6.6e-05	2.99062
TNFRSF18	1.55698	1.65245	4.90849	1.42e-05	7.88e-05	2.9898
ADGRG2	2.53931	2.44172	4.92582	1.34e-05	7.51e-05	2.98945
TMC5	3.39881	0.388346	4.88542	1.53e-05	8.37e-05	2.9882
FAM25G	3.84679	-0.618286	4.87728	1.57e-05	8.56e-05	2.95902
SCUBE3	-1.8916	2.03861	-4.89913	1.47e-05	8.07e-05	2.95067
IL37	4.12559	-0.445799	4.8716	1.6e-05	8.69e-05	2.94899
SFN	3.55485	5.22313	5.02388	9.77e-06	5.73e-05	2.94682
PI3	5.59476	0.392365	4.86911	1.61e-05	8.74e-05	2.94395
WSCD1	-2.17443	2.12078	-4.88848	1.52e-05	8.3e-05	2.94159
SYTL4	-1.52357	2.47913	-4.91102	1.41e-05	7.83e-05	2.92873
IVL	6.14842	3.22318	4.89462	1.49e-05	8.18e-05	2.92574
TMEM100	-1.64946	-0.365431	-4.85993	1.66e-05	8.97e-05	2.91716
OCIAD2	1.55047	2.18011	4.89703	1.48e-05	8.12e-05	2.91319
KCNIP4	-2.68932	-2.41829	-4.88863	1.52e-05	8.3e-05	2.90562
OPCML	-2.20405	-2.04585	-4.87376	1.59e-05	8.64e-05	2.89666
HCN2	1.67295	1.44479	4.86797	1.62e-05	8.77e-05	2.89372
CST7	1.74212	2.05106	4.8845	1.54e-05	8.39e-05	2.87767
CA2	2.01004	3.60456	4.93599	1.3e-05	7.3e-05	2.86546
ITIH5	-1.61321	5.59649	-5.04016	9.27e-06	5.49e-05	2.86259
AL117382.1	-1.74052	-1.24554	-4.8472	1.73e-05	9.28e-05	2.86008
FGF10	-2.77993	-1.16169	-4.84315	1.76e-05	9.39e-05	2.84377
GABRG3	3.26207	0.517871	4.83925	1.78e-05	9.5e-05	2.84091
MAPK4	-2.73546	-0.512168	-4.83571	1.8e-05	9.6e-05	2.84084
MT1A	-1.84654	-0.273598	-4.8345	1.81e-05	9.63e-05	2.84072
SPTBN2	1.69834	6.70433	5.0517	8.93e-06	5.32e-05	2.83676
AC141557.1	2.17798	-0.981455	4.83349	1.81e-05	9.65e-05	2.83647
MRAP	-2.15131	-2.1206	-4.84925	1.72e-05	9.23e-05	2.83277
CYP1A1	2.46245	-0.498886	4.82551	1.86e-05	9.86e-05	2.81462
SPRR2G	6.55297	2.16266	4.82874	1.84e-05	9.77e-05	2.79931
PDGFD	-1.7871	3.89688	-4.93354	1.31e-05	7.35e-05	2.79928
AL163636.2	-1.89944	-1.05441	-4.81614	1.92e-05	0.000100928	2.77411
SFRP5	-2.32967	-1.6917	-4.81822	1.9e-05	0.000100416	2.77315
SLC39A2	2.45894	0.949548	4.82341	1.87e-05	9.92e-05	2.76972
LIPN	4.13001	0.438241	4.81202	1.94e-05	0.000102081	2.7695
CPNE4	-2.52366	-1.39634	-4.81879	1.9e-05	0.000100287	2.76574
PDCD1	2.17591	-0.144567	4.80893	1.96e-05	0.000102964	2.76133
CCDC13-AS1	-1.73405	-2.13048	-4.81794	1.9e-05	0.000100478	2.74281
CDH10	-2.63554	-1.94801	-4.81408	1.93e-05	0.00010149	2.74205
GDA	5.11579	1.64771	4.8019	2.01e-05	0.000104983	2.71527
PLPPR1	-2.49671	-3.00222	-4.83146	1.82e-05	9.7e-05	2.71118
GBP1	1.53278	5.66688	4.98987	1.09e-05	6.29e-05	2.70926
CPA2	2.20671	-1.82072	4.80164	2.01e-05	0.000105042	2.70591
WSCD2	-1.6841	-0.706518	-4.78733	2.1e-05	0.000109439	2.69884
ALDH1L1	-2.49165	0.0170591	-4.78658	2.11e-05	0.000109662	2.69668
JUP	1.61707	7.29455	5.01542	1e-05	5.86e-05	2.68787
DSG3	3.01481	5.44348	4.95773	1.21e-05	6.88e-05	2.68083
FCGR3B	2.44034	-0.196991	4.77962	2.16e-05	0.000111767	2.67754
UGT1A7	3.55004	0.0292541	4.78023	2.15e-05	0.000111579	2.67738
EOMES	1.65595	2.30385	4.82769	1.85e-05	9.8e-05	2.67488
TMPRSS4	3.01486	1.49308	4.79969	2.02e-05	0.000105592	2.67318
FAM69C	-1.79269	3.1817	-4.84669	1.74e-05	9.29e-05	2.67061
BDKRB1	1.66082	-0.626907	4.77416	2.19e-05	0.000113355	2.66207
PEG10	-1.56277	4.8982	-4.92119	1.36e-05	7.6e-05	2.65823
TRHDE-AS1	-2.59033	-2.21089	-4.7846	2.12e-05	0.000110257	2.64304
CDCP1	1.89855	3.94294	4.87609	1.58e-05	8.58e-05	2.63152
RNASE7	4.13053	0.701434	4.76923	2.23e-05	0.000114923	2.62968
ANXA9	2.52609	0.768894	4.76943	2.23e-05	0.00011488	2.62318
RPTN	4.97866	0.188424	4.75549	2.33e-05	0.000119197	2.60687
VIPR2	-1.64189	-0.761993	-4.75447	2.34e-05	0.000119526	2.60373
RASGRP1	1.65454	3.62502	4.86072	1.66e-05	8.95e-05	2.59452
CFHR3	-1.63445	-1.44225	-4.757	2.32e-05	0.000118742	2.59403
NRG3	-2.3295	4.57263	-4.8805	1.56e-05	8.48e-05	2.57987
TNXB	-1.99012	4.10979	-4.88057	1.56e-05	8.48e-05	2.56971
FAM25A	5.02294	1.06806	4.74848	2.38e-05	0.000121431	2.56753
ELMOD1	3.8755	0.791619	4.74711	2.39e-05	0.000121869	2.56571
TNIP3	2.04143	-0.944532	4.74043	2.44e-05	0.000124028	2.56189
TMEM154	1.99355	3.30618	4.81973	1.89e-05	0.000100009	2.55467
IL21R	1.9208	1.38604	4.75692	2.32e-05	0.000118742	2.54102
FLG	5.82011	8.301	4.9592	1.21e-05	6.85e-05	2.53556
KLK10	3.35545	1.71848	4.75562	2.33e-05	0.000119178	2.53063
PPARG	-1.73088	2.57383	-4.78866	2.09e-05	0.000109086	2.53006
CYP2C18	3.44377	-0.0183174	4.72878	2.54e-05	0.000127953	2.52481
AC243829.4	1.76065	-2.23612	4.7323	2.51e-05	0.000126825	2.50897
CCL4L2	2.22823	-0.810018	4.72078	2.6e-05	0.000130566	2.50407
STRA6	2.32838	1.49858	4.73632	2.48e-05	0.000125545	2.49452
CXXC4	-1.56885	-1.93805	-4.7272	2.55e-05	0.000128504	2.49046
FGFBP1	3.61744	1.37974	4.73321	2.5e-05	0.000126637	2.48524
PLA2G2F	3.37828	-0.335948	4.71279	2.67e-05	0.000133323	2.48019
RUFY4	2.01792	0.0243557	4.71584	2.65e-05	0.000132312	2.47997
A2ML1	3.66223	4.3902	4.83399	1.81e-05	9.64e-05	2.47479
IL2RA	1.66467	1.21569	4.73255	2.51e-05	0.000126789	2.47389
MRGPRE	-1.93939	-2.86936	-4.73258	2.51e-05	0.000126789	2.46296
CAND2	-1.64086	2.51851	-4.75704	2.32e-05	0.000118742	2.45775
RAET1E	3.69389	0.00523785	4.70565	2.73e-05	0.000135938	2.45626
TRIM51	1.50796	1.05089	4.71552	2.65e-05	0.000132346	2.45484
ME3	-1.51606	4.65802	-4.86144	1.66e-05	8.94e-05	2.4542
SPRR1B	5.74742	3.91944	4.76296	2.27e-05	0.00011689	2.4216
SLURP1	4.98797	0.419379	4.69231	2.85e-05	0.000140686	2.4173
HRASLS5	-2.07128	-1.53564	-4.69437	2.83e-05	0.000139974	2.41589
CALML5	4.29593	4.18657	4.79208	2.07e-05	0.000108006	2.40925
SPRR2E	6.15214	3.05614	4.71798	2.63e-05	0.000131475	2.40336
FASLG	1.61808	0.578096	4.69761	2.81e-05	0.000138917	2.40304
TCN1	3.4356	-0.435467	4.68392	2.93e-05	0.000144007	2.39576
ARHGDIG	-1.78803	-2.1764	-4.69403	2.84e-05	0.00014009	2.38546
AC007182.1	1.57995	-2.02263	4.68869	2.89e-05	0.000141977	2.38474
POU3F1	2.56296	1.74073	4.70712	2.72e-05	0.000135469	2.37234
KCNT1	-1.5797	-1.37709	-4.67782	2.99e-05	0.000146253	2.37188
ELF5	2.48188	-1.87712	4.67806	2.99e-05	0.000146215	2.36228
SEL1L2	-1.88383	-3.27627	-4.7076	2.72e-05	0.000135333	2.36122
PDIA2	-1.76031	-1.79796	-4.68109	2.96e-05	0.000145006	2.36055
XIRP1	2.38922	-0.802212	4.67087	3.06e-05	0.000149074	2.35699
SCN4A	-2.2368	0.0861443	-4.67141	3.05e-05	0.000148873	2.35538
FCN3	1.5415	-1.58436	4.67455	3.02e-05	0.000147534	2.35497
KRT78	4.40957	0.910296	4.67641	3e-05	0.000146878	2.34854
HTR3A	1.92293	-2.49433	4.68063	2.96e-05	0.000145127	2.3468
DCT	-1.83357	9.47402	-4.91804	1.38e-05	7.68e-05	2.3367
AC079781.3	-1.519	-2.49863	-4.68246	2.94e-05	0.000144608	2.33587
PCDHB8	-1.55537	1.73693	-4.67865	2.98e-05	0.000145979	2.31471
GPX2	2.68026	1.14672	4.67335	3.03e-05	0.000148028	2.30448
GPR20	-1.50239	-1.44426	-4.65051	3.26e-05	0.000157489	2.29032
LAIR2	2.1761	-2.71875	4.66401	3.12e-05	0.000151678	2.28823
NPAS1	1.72852	-0.156017	4.6478	3.29e-05	0.000158601	2.28811
UBD	3.76024	0.21446	4.65241	3.24e-05	0.000156707	2.28797
MPPED1	-2.15906	-2.95436	-4.66855	3.08e-05	0.000149828	2.28684
CPNE7	1.66683	1.66476	4.67144	3.05e-05	0.000148873	2.2866
LCE2D	4.45916	0.849187	4.65354	3.23e-05	0.000156303	2.28454
CRTAM	1.61536	0.0114193	4.64471	3.32e-05	0.000159953	2.26853
CCL20	1.96732	-2.47347	4.6549	3.22e-05	0.000155779	2.26403
GZMB	2.52143	1.2302	4.65764	3.19e-05	0.000154455	2.25709
PLA2G7	1.9216	3.2456	4.7255	2.56e-05	0.000129038	2.24605
SPATA31D1	-1.80812	-3.01874	-4.65431	3.22e-05	0.00015603	2.24094
GNLY	2.092	1.81639	4.66983	3.07e-05	0.000149444	2.23612
TM4SF19	2.75802	-1.65311	4.63715	3.4e-05	0.000163079	2.2347
AL136982.5	2.47332	-2.31351	4.63693	3.41e-05	0.000163153	2.22839
PRKAG3	-1.65944	-1.23537	-4.62771	3.51e-05	0.000167291	2.22584
IGF2BP3	1.85357	0.727848	4.63024	3.48e-05	0.000166186	2.22286
LHCGR	-2.08601	-2.43562	-4.6397	3.38e-05	0.000161958	2.2224
LCE1B	4.78451	1.20914	4.63265	3.45e-05	0.000165075	2.2164
NLRP10	3.5822	0.584228	4.6283	3.5e-05	0.000167016	2.21194
BMP3	-2.26524	-3.0193	-4.64121	3.36e-05	0.000161376	2.20179
AC106872.5	-1.64844	1.32969	-4.62919	3.49e-05	0.000166662	2.18257
DLX3	2.38438	0.9017	4.61849	3.61e-05	0.000171486	2.16589
APOC2	3.86953	-0.0277578	4.60954	3.72e-05	0.000175851	2.16335
EPS8L1	1.67067	4.49369	4.75141	2.36e-05	0.000120421	2.14821
EPHA1	2.4747	3.17727	4.68088	2.96e-05	0.000145048	2.13711
SMPD3	2.70854	3.07207	4.67584	3.01e-05	0.000147088	2.13423
RAET1G	1.86178	-0.12326	4.59385	3.91e-05	0.000183535	2.1238
LCE1A	3.97321	0.337042	4.5949	3.9e-05	0.000183099	2.1231
ROPN1	1.72127	1.17414	4.60506	3.77e-05	0.000177995	2.11466
DCAF12L1	-2.3753	-2.28568	-4.59903	3.85e-05	0.000180923	2.11444
ZBTB16	-2.08897	3.54409	-4.69495	2.83e-05	0.00013978	2.10188
PHACTR3	1.77616	0.0932492	4.58577	4.01e-05	0.000187598	2.10142
OR7C1	2.81393	0.305762	4.58453	4.03e-05	0.000188193	2.09565
GPR18	1.67025	0.517569	4.58979	3.96e-05	0.000185614	2.09423
COL6A6	1.98661	4.58883	4.74371	2.42e-05	0.000122953	2.09135
GRIA2	-4.99125	-1.05477	-4.58085	4.07e-05	0.000190239	2.08178
RHCG	3.52201	0.0756443	4.57616	4.14e-05	0.000192637	2.06906
SOX8	-1.54559	2.99467	-4.64322	3.34e-05	0.000160529	2.06901
TKTL1	1.85865	-1.79163	4.57632	4.13e-05	0.00019259	2.06442
LIPM	4.02431	0.496601	4.57542	4.15e-05	0.000193048	2.05859
SLC6A14	3.8905	0.581208	4.57715	4.12e-05	0.000192171	2.05825
ACP7	3.72751	0.646606	4.57638	4.13e-05	0.00019259	2.04978
WFDC5	4.18428	0.423879	4.56655	4.26e-05	0.000198007	2.03072
DUOXA1	2.36179	4.80898	4.7284	2.54e-05	0.000128074	2.02657
SPP1	3.90918	2.54071	4.59147	3.94e-05	0.000184713	2.01461
FAM110C	1.8394	0.907612	4.56864	4.24e-05	0.000196745	2.0108
SBSN	4.3461	5.95684	4.74646	2.4e-05	0.000122061	2.00431
SERPINB13	4.22338	2.29472	4.59417	3.91e-05	0.000183429	1.99994
FPR1	1.95822	0.636122	4.55215	4.46e-05	0.00020547	1.98393
STYK1	1.70014	-0.169753	4.54449	4.58e-05	0.000209644	1.97771
AMHR2	-1.58651	-1.66007	-4.54425	4.58e-05	0.000209702	1.97729
ADCY1	1.77126	2.44356	4.60371	3.79e-05	0.000178557	1.97264
HLA-DQB2	1.63554	2.93779	4.62281	3.56e-05	0.000169384	1.96884
DMKN	2.24079	7.03156	4.78358	2.13e-05	0.00011047	1.9681
CD300LF	1.58933	-0.453699	4.5383	4.67e-05	0.000213256	1.96726
KCNAB1	-1.82188	0.218723	-4.54225	4.61e-05	0.00021084	1.96668
EPHA4	1.50148	5.03887	4.72635	2.56e-05	0.000128754	1.95676
LRP2	5.25865	1.7396	4.53464	4.72e-05	0.000215243	1.93504
PCP4	-2.63581	-2.43193	-4.53887	4.66e-05	0.000212916	1.93019
RHBG	2.388	-0.73322	4.52273	4.9e-05	0.000222339	1.92259
CCKAR	-2.15929	-2.93799	-4.53742	4.68e-05	0.000213752	1.9088
RANBP3L	-1.74414	-0.70251	-4.51432	5.04e-05	0.000227505	1.90096
LRRC75A-AS1	-1.71441	-2.23549	-4.52424	4.88e-05	0.000221379	1.89628
MAL2	3.19786	3.20133	4.59205	3.93e-05	0.000184459	1.8725
LILRB4	1.75041	2.95085	4.5844	4.03e-05	0.000188193	1.87245
CXCR6	1.50506	0.854442	4.52781	4.82e-05	0.000219138	1.87147
LHX2	-2.68654	2.78802	-4.55784	4.38e-05	0.000202651	1.87024
RIMS1	-1.98661	-1.36592	-4.50285	5.22e-05	0.000234732	1.86662
PERP	1.97133	6.68293	4.74587	2.4e-05	0.000122228	1.86521
RIMS2	1.62281	0.488649	4.50933	5.12e-05	0.000230598	1.85445
CD1A	2.12378	1.451	4.52905	4.81e-05	0.000218582	1.85067
ASPRV1	2.88051	4.62175	4.65047	3.26e-05	0.000157489	1.84723
CYTL1	1.55009	1.22974	4.52018	4.94e-05	0.000223991	1.84467
POU6F2	-1.6532	-2.52433	-4.50179	5.24e-05	0.000235311	1.83313
TRPA1	1.70583	-2.03818	4.4927	5.39e-05	0.000240951	1.82161
HOXC13	2.11286	-0.33019	4.48808	5.47e-05	0.00024383	1.81784
KLK6	4.80282	1.41343	4.50552	5.18e-05	0.000232969	1.8131
LINC01529	-2.58719	-0.879153	-4.4834	5.55e-05	0.00024628	1.80991
CCR8	1.50493	0.821782	4.50178	5.24e-05	0.000235311	1.80272
FCGR1B	1.96795	0.745543	4.49305	5.39e-05	0.00024075	1.80263
ADH1A	-2.16175	-2.70787	-4.4908	5.43e-05	0.000241962	1.79517
KLRK1	1.65747	1.68	4.51642	5e-05	0.000226203	1.78669
TMPRSS13	2.50523	3.29267	4.5732	4.18e-05	0.000194282	1.78571
KLRC1	1.87307	0.177927	4.48063	5.6e-05	0.000248224	1.77848
LAMA1	1.7861	4.34079	4.61252	3.68e-05	0.000174445	1.76404
TOX3	-2.23738	-1.0554	-4.46693	5.85e-05	0.000257584	1.76113
SLC5A1	3.50807	1.54936	4.4943	5.37e-05	0.000240009	1.75603
TMPRSS11F	2.90322	0.625318	4.47703	5.67e-05	0.000250788	1.7543
AC068587.1	-1.7879	0.170905	-4.46856	5.82e-05	0.000256506	1.75217
MEP1A	1.94096	-2.15889	4.46123	5.96e-05	0.000261323	1.7394
FAM83A	3.38806	2.80281	4.53101	4.78e-05	0.000217354	1.73666
TIFAB	1.51955	2.15945	4.51935	4.96e-05	0.000224476	1.7309
SPX	-1.75981	-2.83023	-4.47391	5.72e-05	0.000252935	1.72776
SPINK7	2.96833	-2.64363	4.46259	5.93e-05	0.000260431	1.72569
TRIM51CP	2.07129	-3.34857	4.47263	5.75e-05	0.000253841	1.72453
DACH2	-1.7235	-2.49192	-4.46309	5.92e-05	0.000260151	1.72317
KCTD4	2.6201	-0.710148	4.45153	6.14e-05	0.000268215	1.71896
RPL24P8	-1.50077	-2.31025	-4.45676	6.04e-05	0.000264505	1.71329
TTC22	2.1776	1.91943	4.49771	5.31e-05	0.000237705	1.7129
MGAT4C	-2.03281	-2.09811	-4.45416	6.09e-05	0.000266386	1.71061
TCEAL2	-1.87701	-2.25106	-4.45494	6.08e-05	0.00026585	1.7061
LCE6A	4.09661	0.274775	4.45283	6.12e-05	0.000267391	1.70523
BICDL1	1.86038	3.31993	4.55025	4.49e-05	0.000206574	1.70433
TMIGD3	1.86048	-0.870442	4.44491	6.27e-05	0.000273118	1.7001
B4GALNT1	-1.56207	2.26692	-4.49304	5.39e-05	0.00024075	1.68971
SLC10A6	1.8592	2.31666	4.498	5.3e-05	0.000237545	1.67428
LAG3	1.61876	1.21925	4.46538	5.88e-05	0.000258671	1.66884
OR51B4	-1.53306	-1.77243	-4.43641	6.45e-05	0.000279299	1.6672
VAX1	2.09305	-2.08887	4.43468	6.48e-05	0.000280578	1.6648
CMA1	-1.94058	1.93989	-4.48434	5.54e-05	0.000245892	1.65434
C19orf33	2.24841	1.94896	4.47623	5.68e-05	0.000251366	1.65114
EDN3	-2.10751	-1.88407	-4.43068	6.56e-05	0.000283617	1.64669
OTOP3	1.84567	-2.62255	4.43523	6.47e-05	0.000280157	1.64602
SFRP4	-1.77421	0.799623	-4.44082	6.36e-05	0.00027624	1.64299
ATP2C2	3.53051	1.87899	4.46345	5.92e-05	0.000260022	1.6378
SDC1	1.9376	5.30085	4.63181	3.46e-05	0.000165435	1.63361
ZBED2	1.88978	-0.59392	4.42237	6.74e-05	0.000289885	1.62683
GNG4	2.12019	-0.880223	4.41873	6.82e-05	0.000292663	1.62416
MLNR	-1.5981	-2.32575	-4.42821	6.61e-05	0.000285409	1.62381
B3GNT3	1.78611	-0.379886	4.41874	6.81e-05	0.000292663	1.61385
SPRR2D	4.92443	1.75537	4.43995	6.37e-05	0.000276872	1.60902
KIF12	-1.56745	-1.20978	-4.41275	6.95e-05	0.000297234	1.60698
EPHX3	2.2031	2.89137	4.49604	5.34e-05	0.000238859	1.6044
ASTN1	-1.75724	-0.987541	-4.40995	7.01e-05	0.000299007	1.60015
CNTN4	-2.01303	2.93602	-4.49704	5.32e-05	0.000238158	1.5894
SLC26A9	2.78642	0.712491	4.42196	6.75e-05	0.000290066	1.58532
PSORS1C2	3.45953	-0.182144	4.40402	7.14e-05	0.000303982	1.57484
MYOM3	1.63632	0.703863	4.41431	6.91e-05	0.000296032	1.57017
STMN2	-1.79089	3.0448	-4.48559	5.52e-05	0.000245191	1.56896
KLK14	2.68697	-2.00559	4.39758	7.29e-05	0.000309483	1.55687
CCL3L1	1.78676	-1.75205	4.39596	7.32e-05	0.000310774	1.55527
MACC1	2.05756	2.53612	4.46441	5.9e-05	0.000259413	1.54872
AQP9	2.64431	0.311189	4.39926	7.25e-05	0.000308031	1.54707
UNC93A	3.43644	0.399612	4.40278	7.17e-05	0.000304972	1.54694
PEG3	-2.54166	1.56069	-4.40726	7.07e-05	0.000301357	1.54457
CRCT1	4.35999	1.24965	4.41242	6.95e-05	0.000297476	1.53932
SLITRK3	-2.10926	-1.81797	-4.38146	7.67e-05	0.000323319	1.51366
FAM83G	2.06731	4.65266	4.5537	4.44e-05	0.000204754	1.51196
OR7A5	2.70637	1.14595	4.39523	7.34e-05	0.000311216	1.50865
AQP5	2.33631	-1.30787	4.37553	7.81e-05	0.000328473	1.50222
CLDN19	-1.99973	-3.16574	-4.38865	7.49e-05	0.000316697	1.49371
CDSN	5.24961	3.44868	4.44316	6.31e-05	0.000274508	1.49268
ALOXE3	3.49995	1.49495	4.40671	7.08e-05	0.000301751	1.49232
AQP3	2.62838	4.61871	4.54337	4.59e-05	0.000210142	1.48983
TTC24	1.53182	-0.660728	4.36987	7.95e-05	0.000333582	1.47742
CIDEC	-1.87292	-2.78944	-4.37898	7.73e-05	0.000325143	1.47427
GDNF	-2.1734	-0.204463	-4.36832	7.99e-05	0.000335068	1.47377
WNT4	2.1891	2.15625	4.4166	6.86e-05	0.00029436	1.47108
AC036214.3	1.77133	0.856243	4.37923	7.72e-05	0.000325108	1.46464
GRIK2	-1.72162	3.63211	-4.46956	5.8e-05	0.000255874	1.45364
PGLYRP3	3.24784	1.75677	4.39756	7.29e-05	0.000309483	1.44963
TRIM10	1.89302	-1.9302	4.35802	8.25e-05	0.000344817	1.44925
IL18	1.95007	3.37571	4.46395	5.91e-05	0.000259732	1.44098
HES2	2.04763	-0.886136	4.35533	8.32e-05	0.0003473	1.44063
E2F8	1.52795	2.13001	4.40997	7.01e-05	0.000299007	1.43915
IL2RG	1.50299	3.79363	4.5001	5.27e-05	0.000236236	1.43066
LCE2C	4.96789	1.53111	4.37359	7.86e-05	0.000330269	1.42767
ACTC1	-2.25081	-3.73625	-4.37362	7.86e-05	0.000330269	1.42415
F2RL1	2.25754	2.51133	4.41581	6.88e-05	0.000294838	1.42326
CXCL3	1.64159	-1.37598	4.34737	8.53e-05	0.000355104	1.4219
DCDC2	1.71087	-0.942006	4.34583	8.57e-05	0.000356364	1.4173
NCR1	1.74648	-1.47785	4.34441	8.61e-05	0.000357724	1.41366
PLA2G4D	3.67948	1.16096	4.37315	7.87e-05	0.000330652	1.40589
CASP12	-2.22201	0.547988	-4.3523	8.4e-05	0.000350239	1.40432
SLC25A41	-1.79384	-1.23082	-4.34083	8.71e-05	0.000361166	1.40273
CCDC33	1.90943	-1.95717	4.34054	8.72e-05	0.000361166	1.39906
MYPN	1.68821	-2.5938	4.34662	8.55e-05	0.000355707	1.39735
ELOVL7	1.90698	2.84225	4.42704	6.64e-05	0.000286404	1.39179
VSNL1	2.1891	1.05222	4.36379	8.1e-05	0.000339137	1.38709
CSPG4P10	-1.72873	2.4039	-4.39375	7.37e-05	0.000312471	1.34767
LY6D	4.07795	3.17333	4.39537	7.34e-05	0.00031115	1.34706
ARHGAP40	2.99643	0.877727	4.34048	8.72e-05	0.000361166	1.33523
NCCRP1	3.70137	2.64871	4.38608	7.55e-05	0.000318993	1.33412
TMPRSS11A	2.16578	-3.03342	4.31909	9.32e-05	0.000382937	1.31909
AC011504.1	-1.67729	-3.21571	-4.32544	9.14e-05	0.000376427	1.31181
LRRC4B	-1.70377	1.44471	-4.34275	8.66e-05	0.000359281	1.30783
KLK11	4.25342	1.84393	4.34548	8.58e-05	0.000356681	1.29933
SDCBP2	1.63746	2.28522	4.37206	7.9e-05	0.000331574	1.29906
ADH7	2.28565	-1.90165	4.30169	9.85e-05	0.000401361	1.29043
SLC12A8	1.56291	1.50858	4.33836	8.78e-05	0.00036326	1.27863
NAPSB	1.55333	0.889816	4.32235	9.23e-05	0.000379537	1.26565
AC239798.4	-1.62444	0.0650818	-4.29135	0.000101706	0.000412698	1.25
PSG7	2.51194	-1.43836	4.2841	0.000104041	0.00042084	1.24234
PPP1R1B	-2.26717	-2.09556	-4.28581	0.000103487	0.000418869	1.23895
ZNF385B	-1.83209	0.0862203	-4.28843	0.00010264	0.000415963	1.23664
NPY5R	-1.84129	-2.5151	-4.28631	0.000103324	0.000418298	1.23539
NR0B1	-2.40306	-0.31899	-4.2822	0.000104661	0.000422911	1.22728
CYS1	-1.53837	-0.965014	-4.27891	0.000105742	0.000426298	1.22664
SPRR2A	5.12202	0.648405	4.28879	0.000102527	0.000415678	1.21963
PRDM7	2.64619	-1.08606	4.27392	0.000107405	0.0004321	1.21416
ADH1C	-1.91879	-2.97844	-4.28194	0.000104744	0.00042303	1.20438
ZNF385C	-1.53308	-0.755142	-4.26878	0.000109143	0.000438181	1.19795
DUOX1	1.98467	5.71006	4.50914	5.12e-05	0.000230633	1.1926
NIPAL4	2.88396	2.43048	4.33935	8.75e-05	0.000362206	1.19165
KRT13	2.66065	-1.80075	4.26517	0.000110381	0.000442049	1.1895
ABCA13	2.00031	2.18178	4.31931	9.32e-05	0.000382765	1.18743
KLHL33	-1.58819	-1.22903	-4.26338	0.000111001	0.00044389	1.18385
LEXM	1.7603	-2.21019	4.26485	0.000110492	0.000442341	1.18166
AC092667.1	-1.57863	-0.252487	-4.2639	0.000110819	0.00044353	1.17378
CPN1	2.24477	1.62715	4.3073	9.68e-05	0.000395253	1.17226
AL583836.1	3.00534	-0.497117	4.26179	0.000111554	0.000445824	1.16794
C2orf40	-2.57969	-0.181449	-4.2614	0.000111689	0.000446017	1.16493
IQCA1	-1.81203	0.19017	-4.26694	0.000109774	0.000440074	1.1648
WDR86	-1.72465	0.984699	-4.2866	0.00010323	0.000418092	1.15697
FGFBP2	-2.15247	3.96496	-4.3948	7.35e-05	0.000311575	1.14331
TMEM158	1.56558	1.02812	4.27117	0.000108331	0.000435374	1.13979
SYT6	2.73901	-1.65926	4.2474	0.000116677	0.000462281	1.13856
C8orf89	-1.52142	-1.90705	-4.24425	0.00011783	0.000466563	1.12431
KLRD1	1.83919	0.126404	4.25613	0.000113543	0.000452369	1.12145
CNIH3	1.74697	2.9242	4.32346	9.2e-05	0.000378525	1.10861
GBP5	1.95187	4.07458	4.39171	7.42e-05	0.000314209	1.10255
DEFB136	1.88111	-2.77047	4.23478	0.00012136	0.000477703	1.08107
PTCHD4	-1.82924	4.0677	-4.37915	7.72e-05	0.000325108	1.07716
SERPINB12	4.95178	0.999058	4.24229	0.000118552	0.000468832	1.06991
SERPINB5	3.23159	4.44624	4.38958	7.47e-05	0.000316187	1.06871
ABCC8	-1.67397	-2.3975	-4.22773	0.000124053	0.000486816	1.06615
ENTHD1	2.37703	-0.136876	4.22149	0.000126489	0.000495569	1.05092
KLK7	4.53681	3.2784	4.3015	9.85e-05	0.000401445	1.03851
RHBDL2	1.98198	1.17426	4.24994	0.000115758	0.000459676	1.0373
FOXQ1	1.9597	0.748475	4.23482	0.000121344	0.000477703	1.03516
MORN2	-1.87094	-1.4581	-4.21055	0.000130868	0.000510142	1.03504
TPTE2P6	-1.5276	-2.57623	-4.21223	0.000130185	0.000508288	1.02399
ADGRF1	1.79313	-1.52352	4.20551	0.000132935	0.000517152	1.02106
EPHA8	1.65609	-2.4325	4.20648	0.000132535	0.000515895	1.01801
FLG2	5.56848	6.67924	4.429	6.6e-05	0.000284893	1.00615
SMARCE1P5	-1.7293	-2.09563	-4.20172	0.000134512	0.000522238	1.00325
SPINK5	3.97839	5.71778	4.4311	6.55e-05	0.000283324	1.00228
FBXO40	-1.55705	-3.46128	-4.21397	0.000129482	0.000506063	1.00034
LAD1	2.78136	4.42881	4.37067	7.93e-05	0.000332815	0.995911
PPP2R2C	2.81421	2.59347	4.27664	0.000106496	0.000428892	0.995812
PLEKHN1	1.97303	2.49941	4.27494	0.000107063	0.000430907	0.992119
SMC1B	1.75682	-1.51027	4.19027	0.000139383	0.000538984	0.978616
ACAN	-1.86984	1.19615	-4.22107	0.000126652	0.000496109	0.974812
KPRP	5.64242	3.35422	4.26358	0.000110931	0.0004437	0.971789
TMEM45A	2.07365	5.87806	4.43767	6.42e-05	0.000278692	0.967498
KRT1	4.91184	7.12487	4.4452	6.27e-05	0.000272929	0.96613
RAB25	2.66139	2.6747	4.2751	0.000107009	0.000430776	0.956596
CCR7	2.10992	1.37676	4.23151	0.000122603	0.000482008	0.955809
CNTNAP2	1.57761	-2.3062	4.18015	0.000143829	0.000552747	0.944372
LCE1C	3.92968	1.21625	4.19831	0.000135945	0.000527165	0.909091
PRF1	1.62352	2.08525	4.24245	0.000118492	0.000468706	0.908697
ANKRD18B	2.49565	1.53241	4.20823	0.000131814	0.000513516	0.907912
OMG	1.72261	1.37548	4.20008	0.000135196	0.000524578	0.903409
HOPX	2.90857	3.40105	4.27016	0.000108674	0.000436474	0.895231
NLRP2	2.27943	1.24164	4.19037	0.00013934	0.000538926	0.879877
ARG1	5.26282	1.65225	4.18868	0.000140071	0.000540779	0.87915
C8orf22	-1.80446	-2.02464	-4.15186	0.000157015	0.000596189	0.869995
EPPK1	2.36169	5.97644	4.4006	7.22e-05	0.000306935	0.869422
PTCRA	1.59525	-2.03631	4.14628	0.000159751	0.000604559	0.856963
GDF15	1.98261	3.14891	4.24959	0.000115884	0.000460082	0.852557
KLK5	4.88886	3.11208	4.22606	0.000124702	0.000489261	0.84789
TGFA	1.68132	0.325372	4.16123	0.000152523	0.000581992	0.84534
AC099687.1	-2.15223	-3.29862	-4.15613	0.000154949	0.00058985	0.843542
CD2	1.62675	3.73983	4.29905	9.93e-05	0.000404232	0.843167
GPC6	-2.1333	1.84302	-4.18761	0.000140537	0.000542142	0.84104
MYRFL	2.04608	-2.15508	4.13981	0.000162977	0.000614719	0.836205
AC022075.1	1.53307	-2.3445	4.13844	0.000163673	0.000616744	0.83171
LCE2A	2.74534	1.77876	4.1882	0.00014028	0.00054137	0.81544
LYPD2	2.76262	-1.94953	4.12915	0.000168442	0.000632002	0.808868
XKRX	2.65951	2.75672	4.21877	0.000127561	0.000499163	0.803538
C2orf54	2.87174	1.25306	4.16821	0.000149258	0.000570884	0.791394
TBX21	1.89733	0.55107	4.14712	0.000159337	0.000603343	0.784367
AC004889.1	-1.68553	-2.1646	-4.12048	0.000173015	0.000646899	0.783348
PPP1R14C	2.29467	1.9569	4.1807	0.000143584	0.000552025	0.78307
SAMD11	-1.53112	0.172296	-4.12988	0.000168063	0.000630946	0.773719
IL1B	1.6475	-0.25526	4.12362	0.000171342	0.000641014	0.769189
FAM163A	-2.53499	-2.6752	-4.11617	0.00017533	0.000654163	0.752269
RARB	-1.57965	3.14303	-4.21468	0.000129196	0.000505047	0.751965
DEFB4A	3.27128	-2.64811	4.10878	0.000179379	0.000666565	0.747505
TNPO1P2	1.61085	-2.4301	4.10829	0.000179651	0.00066698	0.746037
BPIFC	4.16468	1.47917	4.14942	0.000158205	0.000599694	0.739574
ZNF727	-1.61485	2.08101	-4.16631	0.000150139	0.0005738	0.734592
THEM5	3.62372	0.914374	4.13205	0.000166938	0.000627089	0.733916
EGF	2.27621	-0.279614	4.10826	0.000179663	0.00066698	0.728053
AC068587.2	-2.08465	-2.32355	-4.10115	0.000183647	0.00067968	0.726591
WNT3	2.0903	1.54704	4.14436	0.000160699	0.000607827	0.716225
CEACAM5	2.59911	-0.478105	4.10348	0.000182334	0.000675598	0.712493
AC087641.1	-1.75679	-2.59051	-4.09636	0.000186382	0.000687827	0.709948
SIGLEC11	-1.77591	-0.9617	-4.09418	0.000187638	0.00069167	0.704762
NPBWR1	1.73919	-2.81773	4.09383	0.00018784	0.00069222	0.703975
SLC1A2	-2.20579	-3.42151	-4.10193	0.000183208	0.000678317	0.699458
PAMR1	-2.16272	2.97912	-4.20347	0.000133781	0.000520025	0.698703
MUCL1	3.02666	0.325976	4.11291	0.000177107	0.000659644	0.69561
SRL	-1.52864	-1.30115	-4.08839	0.000191012	0.000702207	0.694642
PDZK1IP1	3.00858	0.96745	4.12501	0.000170607	0.00063861	0.689906
BICDL2	2.50832	1.61671	4.14231	0.000161721	0.000611056	0.686624
CLCA4	3.37116	1.1193	4.11333	0.000176875	0.000659036	0.663911
KRT17	3.35872	5.64818	4.3098	9.6e-05	0.000392503	0.634597
ZDHHC8P1	-1.55757	-2.22205	-4.06285	0.000206635	0.000751091	0.624938
GCNT3	1.93101	-2.47556	4.06236	0.000206943	0.000752072	0.62238
IDO1	2.52794	1.28198	4.10629	0.000180761	0.000670669	0.619154
SYT5	1.54327	-2.10808	4.05994	0.000208485	0.000756536	0.618051
AC017007.2	-1.5161	-0.471586	-4.06302	0.000206522	0.000750822	0.609883
LCE2B	5.12642	1.9659	4.10061	0.000183953	0.000680423	0.607846
CCL5	1.90749	3.23998	4.18671	0.00014093	0.000543192	0.600459
ANKRD22	2.41499	1.01637	4.08734	0.000191632	0.000703801	0.587799
ADRB1	-1.58965	-1.39935	-4.05028	0.000214765	0.000775164	0.586079
KRT80	3.10891	3.89757	4.19502	0.000137342	0.000532051	0.567564
PSG4	2.65456	-0.845998	4.0451	0.00021821	0.000785483	0.566258
WFDC2	-1.61319	-1.48607	-4.04181	0.000220423	0.000792358	0.566193
CCL22	2.05283	-0.578859	4.04825	0.000216109	0.000778789	0.560734
MLXIPL	-2.40505	-0.382829	-4.04929	0.000215422	0.000776894	0.560691
GRHL3	3.46072	2.52676	4.1172	0.000174773	0.000652336	0.548821
AL136982.7	-1.7743	-1.28769	-4.0349	0.000225148	0.000806999	0.547763
PPARGC1A	-1.50076	3.41122	-4.17331	0.000146914	0.000563145	0.544873
CLCA2	2.75875	5.83143	4.2949	0.000100584	0.000408489	0.539847
PDE8B	-1.52424	1.81479	-4.0962	0.000186474	0.000687904	0.529474
TMEM40	3.09843	1.66364	4.08875	0.000190803	0.000701597	0.522661
HYAL4	2.13498	-1.14674	4.02797	0.000229981	0.00082173	0.521391
GPR37L1	-3.03138	-1.27608	-4.02372	0.000232997	0.000831278	0.519839
ATP6V1C2	2.97417	3.46064	4.14778	0.000159008	0.000602336	0.517141
C1orf68	5.10699	1.20818	4.04707	0.000216891	0.000781462	0.504995
PPP1R9A	-1.52789	4.50951	-4.22966	0.000123309	0.000484387	0.49347
ALOX12B	5.1221	1.81853	4.05026	0.000214782	0.000775164	0.467398
PLAC8	1.7881	0.699762	4.04495	0.000218311	0.0007857	0.466388
MYO5B	2.2463	3.89863	4.17084	0.000148044	0.000567232	0.461698
LRRTM1	-1.78824	-0.709415	-4.00537	0.000246456	0.000872689	0.449453
KRT19	-1.74307	-0.677132	-4.00567	0.00024623	0.00087221	0.445225
ACPP	1.95601	3.84395	4.15478	0.000155599	0.000591974	0.427387
HECW2	1.59002	-0.392144	3.99788	0.000252166	0.000890624	0.427249
RNY4	-1.62028	-2.90413	-3.98785	0.000260013	0.000914558	0.416194
GRIP1	2.13485	3.16312	4.10015	0.000184214	0.000680995	0.41173
KCNA4	-1.5367	-0.920201	-3.98312	0.000263795	0.000925642	0.399622
ZNF683	1.57638	0.735385	4.01764	0.000237376	0.000845028	0.380259
SLAMF6	1.62698	1.29981	4.02585	0.000231476	0.000826309	0.369858
DSC1	4.68404	4.99572	4.1515	0.000157188	0.000596513	0.36611
HNRNPA1P53	-1.51526	-2.93739	-3.97038	0.000274243	0.000956362	0.363516
SLC22A9	-1.94375	-3.40161	-3.97058	0.000274076	0.000956125	0.362175
S100A14	2.93311	3.52039	4.11743	0.000174652	0.000652011	0.361682
CHRNA3	1.70228	-0.659715	3.97164	0.000273198	0.000953406	0.352911
FAM157B	1.62768	-0.265342	3.97497	0.000270438	0.000945481	0.348263
RNF223	1.6375	-1.16497	3.96325	0.000280274	0.000975281	0.342415
FAM84A	1.71263	3.44204	4.10419	0.000181934	0.000674372	0.330637
CKMT2	-1.69813	-0.66796	-3.96289	0.000280584	0.000976007	0.328543
TRGC2	1.57728	0.354076	3.98655	0.000261048	0.000917132	0.321833
SULT2B1	3.00525	3.02069	4.07071	0.000201697	0.000735772	0.31616
HCAR3	1.59393	0.602754	3.98191	0.000264771	0.000928694	0.314696
ECEL1	1.52918	-0.749085	3.95523	0.000287201	0.000996336	0.303881
NALCN	-2.03818	3.66681	-4.06836	0.000203161	0.000740274	0.289651
S100A1	1.99757	5.08068	4.17392	0.000146637	0.00056253	0.280614
ADGRF4	3.14056	1.88229	4.00288	0.00024834	0.000878558	0.275468
KLRC3	1.77375	-0.599572	3.93809	0.000302572	0.00104069	0.247596
CXCL9	3.21922	2.67428	4.02021	0.000235511	0.000838902	0.246272
KRTDAP	4.52082	3.80801	4.05531	0.000211474	0.000765228	0.236896
FAT2	2.4032	7.45489	4.2222	0.000126209	0.000494572	0.214048
GOLGA6D	-2.16455	-4.12109	-3.91995	0.000319716	0.00109265	0.211367
TEX101	1.78639	-2.91893	3.91	0.00032951	0.00112295	0.208697
DLL3	1.60186	0.0243472	3.92476	0.000315085	0.00107874	0.201361
GBP7	-2.41827	-1.94033	-3.89644	0.000343334	0.00116227	0.175151
LY6G6C	3.38259	1.73337	3.96535	0.000278483	0.000969571	0.168026
IL2RB	1.58255	3.01	4.03481	0.000225206	0.000807059	0.160967
GRIA1	-4.7164	3.33675	-3.97222	0.000272713	0.000952238	0.160928
FAM83C	3.02012	2.32898	3.9831	0.000263805	0.000925642	0.149002
NECTIN4	2.44142	2.75637	3.99581	0.000253768	0.000894811	0.132951
LOR	5.04073	2.92648	3.96828	0.000276012	0.00096199	0.128063
ADGRF2	2.07709	0.292894	3.905	0.000334543	0.00113749	0.120025
CWH43	2.73613	2.81799	3.99613	0.000253515	0.000894095	0.114605
MUC16	1.88586	3.14604	4.00559	0.000246287	0.00087225	0.101678
OLFM4	-2.13418	-2.36616	-3.86776	0.000374437	0.00125112	0.0995261
AC099329.3	1.55802	0.32715	3.88979	0.000350314	0.00118155	0.0936515
MAGEL2	-2.90507	-0.25983	-3.88172	0.000358968	0.00120611	0.0887416
FAM26F	2.09801	0.904637	3.90719	0.000332332	0.00113097	0.0862775
LMTK3	2.02809	1.15554	3.91297	0.000326555	0.00111366	0.0851831
ERVFRD-1	-1.69224	-1.45928	-3.85616	0.000387782	0.00129058	0.0574874
SGCZ	-2.01316	-2.93669	-3.85411	0.000390179	0.00129744	0.057382
TCL1A	1.70019	-2.10811	3.85094	0.000393928	0.00130829	0.0498073
CLDN8	-2.29754	-1.78176	-3.8445	0.000401651	0.00132964	0.0356266
CTNNA2	1.91019	1.73444	3.91935	0.000320293	0.00109406	0.033006
ANXA8	2.96553	3.87156	3.99793	0.000252129	0.000890624	0.0178895
GABRQ	1.74508	-1.66195	3.83849	0.000408986	0.00135137	0.0132208
INSC	-1.89451	0.0024807	-3.85639	0.000387513	0.00129013	0.00957193
DEFB134	1.8893	-1.86308	3.83375	0.00041486	0.00136728	0.00778723
GRIA4	-1.54345	-0.0697783	-3.85217	0.000392469	0.00130393	-0.00754937
SGCA	-1.59013	0.388783	-3.86406	0.000378647	0.001263	-0.00925186
P2RX5	1.68588	-0.101871	3.84938	0.000395788	0.00131293	-0.011587
TENM2	1.52634	5.06062	4.08302	0.000194197	0.000712044	-0.0262848
SCNN1A	2.00038	3.29342	3.96953	0.000274957	0.000958507	-0.0265785
BSPRY	1.72389	1.65626	3.89535	0.000344471	0.0011651	-0.0277243
FAM83B	2.67199	4.79099	4.05214	0.000213544	0.000771562	-0.0313989
AC138866.1	-1.63721	0.0432462	-3.83873	0.000408688	0.00135085	-0.0400884
IL7R	1.732	3.59545	3.98285	0.000264013	0.000926204	-0.0601432
C1orf116	2.13698	3.37651	3.96316	0.000280346	0.000975357	-0.076701
MSMB	2.85889	-0.947926	3.80972	0.000445937	0.0014525	-0.0820237
PRRT2	-1.59692	0.63967	-3.83645	0.000411504	0.0013583	-0.0877109
IDO2	1.62625	-1.34053	3.80373	0.000454025	0.0014722	-0.088211
CASP14	4.60272	3.61199	3.93365	0.000306684	0.00105355	-0.0889655
AC040977.2	-2.00119	-2.72478	-3.79701	0.000463279	0.00149798	-0.0889987
CNR2	1.51353	-1.04487	3.80507	0.000452214	0.00146785	-0.0965132
TIGIT	1.87035	0.865556	3.84608	0.000399748	0.00132447	-0.101321
NPTX1	2.17641	-1.02517	3.79458	0.000466668	0.00150844	-0.107518
ATG9B	2.83273	3.23512	3.93276	0.000307519	0.00105601	-0.11189
DTHD1	1.69252	1.0067	3.84172	0.000405032	0.00133991	-0.12158
TGM3	3.42471	1.02185	3.81909	0.000433559	0.00141898	-0.149011
EGFL6	1.58169	-0.0901143	3.80073	0.000458129	0.00148332	-0.150253
HEATR4	-1.88224	-0.335139	-3.79038	0.000472575	0.00152498	-0.159374
AZGP1P1	1.95256	-2.67405	3.76594	0.000508438	0.00161758	-0.169453
LRFN5	-1.5918	2.04318	-3.85906	0.000384403	0.00128044	-0.169578
HRH3	1.62979	-3.03166	3.75465	0.000525874	0.00166391	-0.199299
SLA2	1.52481	0.388365	3.79774	0.000462256	0.00149493	-0.199482
EHF	2.84573	3.33775	3.89414	0.000345731	0.00116813	-0.22273
CPA4	3.17554	2.68846	3.86785	0.000374332	0.00125099	-0.234815
MAS1L	-1.63578	1.12895	-3.80609	0.000450827	0.00146434	-0.247896
TACSTD2	2.32392	4.28674	3.95421	0.0002881	0.000999094	-0.254579
MRGPRX3	-1.97557	-1.45441	-3.73448	0.000558475	0.00175413	-0.258716
LRRC4C	-1.66189	1.35299	-3.78981	0.000473385	0.00152683	-0.276024
DDIT4L	-1.56605	-0.295004	-3.74566	0.000540172	0.00170273	-0.278886
DES	-3.94698	0.564729	-3.75626	0.000523356	0.00165729	-0.285567
ZNF750	2.81063	4.43557	3.93686	0.000303705	0.00104422	-0.300389
BTLA	1.53762	0.606771	3.76147	0.000515265	0.00163569	-0.319158
HHIP	-2.06062	-2.5398	-3.70853	0.000603295	0.00188024	-0.319242
ARHGEF4	1.67575	5.46798	3.99677	0.000253024	0.00089279	-0.321163
CHMP4C	2.03089	0.928192	3.76027	0.000517119	0.00164104	-0.3237
ABCC6P1	-1.51252	-3.37875	-3.70525	0.00060921	0.00189562	-0.33046
HNRNPA1P21	1.52633	-1.39973	3.70912	0.000602245	0.00187757	-0.346888
SDR16C5	2.85998	1.64026	3.78537	0.000479726	0.00154491	-0.353942
GPIHBP1	-1.52868	-1.22382	-3.70673	0.000606524	0.00188817	-0.355525
GJB4	2.62932	0.345402	3.73462	0.000558236	0.00175367	-0.360008
GJB5	2.49718	1.51806	3.77182	0.000499576	0.00159469	-0.362874
RHOV	1.84831	1.56622	3.77244	0.000498641	0.00159263	-0.374832
PLK5	-1.99673	-1.61341	-3.68684	0.000643397	0.00198189	-0.385217
TUBB3	1.86644	3.21142	3.80585	0.000451157	0.00146492	-0.394684
AC008758.6	-1.95492	-2.48426	-3.67786	0.000660737	0.00202818	-0.398389
CYP2C9	2.80195	-1.66525	3.68037	0.000655859	0.00201534	-0.401756
RBP4	-1.80813	-1.99798	-3.67585	0.000664682	0.00203932	-0.407029
AL022318.4	2.26059	0.53745	3.70408	0.000611323	0.00190096	-0.431186
BRINP3	-1.96966	-2.09473	-3.66559	0.000685178	0.00209423	-0.434572
UNC80	-1.52073	5.08387	-3.92438	0.000315445	0.00107978	-0.458088
PKP3	2.65043	4.36928	3.88439	0.000356081	0.00119745	-0.461511
SLC38A3	-1.69302	-2.7053	-3.65099	0.000715372	0.00217447	-0.467512
WFDC3	-2.07562	-1.30991	-3.65305	0.000711029	0.00216366	-0.483055
CXADR	2.22361	6.08868	3.96033	0.000282776	0.000982926	-0.490774
DEFB1	2.2323	1.54079	3.72908	0.000567521	0.00177965	-0.492613
GPR87	2.47874	2.31736	3.76415	0.000511158	0.00162426	-0.495146
PRKCB	2.45543	4.52266	3.83521	0.000413042	0.00136245	-0.506118
LOXL4	-1.68672	4.76754	-3.89764	0.000342084	0.0011591	-0.51045
CRYBG2	2.20556	3.58087	3.82342	0.000427961	0.00140447	-0.514021
SERPINA12	3.95848	1.78227	3.71052	0.000599736	0.00187156	-0.516454
PKP1	2.43231	6.37311	3.94387	0.000297301	0.00102512	-0.551965
CR1L	1.57009	-1.10592	3.63167	0.000757316	0.00228329	-0.554027
SLC12A3	1.70948	-0.814217	3.63956	0.000739897	0.00223636	-0.558095
FOXN4	-1.65552	-2.44753	-3.60894	0.000809669	0.00242149	-0.575461
HRK	1.69225	-1.75151	3.61196	0.000802521	0.0024016	-0.576338
ANXA8L1	2.90794	4.15222	3.82425	0.000426889	0.00140182	-0.577342
C9orf152	-1.53219	-2.95402	-3.60508	0.000818907	0.00244458	-0.584788
ARMC3	-1.5804	-1.80203	-3.60697	0.000814371	0.00243254	-0.588685
MCIDAS	1.61907	-2.23432	3.60457	0.000820137	0.00244717	-0.590594
TP53AIP1	1.71516	3.31983	3.77338	0.000497253	0.00158922	-0.594179
AC135731.1	1.88635	-1.18116	3.61532	0.000794635	0.00238058	-0.59508
FCRL3	2.02848	1.73687	3.70061	0.000617658	0.00191602	-0.599862
SPRR2F	2.46193	-2.08426	3.60356	0.000822574	0.00245243	-0.604511
KRT16P2	1.81559	-2.55114	3.59789	0.000836367	0.00248786	-0.611728
KRT10	2.90146	8.5373	3.94989	0.000291909	0.00100995	-0.620992
RDH12	1.96188	1.8331	3.69327	0.000631243	0.00195035	-0.629001
VAT1L	-1.73711	-2.79618	-3.58719	0.000863024	0.00255653	-0.631598
CLEC4E	1.50874	-0.589679	3.60352	0.000822679	0.00245243	-0.647004
C3orf52	2.03032	2.02956	3.69054	0.000636378	0.00196371	-0.648804
EPN3	2.44621	2.53786	3.71713	0.000588064	0.00183811	-0.649481
COL20A1	-2.80832	-1.27455	-3.58552	0.000867269	0.00256713	-0.654488
PAK6	2.01653	-0.825261	3.59494	0.000843656	0.00250722	-0.656103
CLEC4C	1.71119	-0.39726	3.61167	0.000803223	0.00240333	-0.658106
PCDH8	-1.51488	-2.73212	-3.57229	0.000901521	0.00265429	-0.67037
IL1A	1.5932	-2.05869	3.57304	0.000899537	0.00264966	-0.680875
C4orf19	-1.92473	2.48301	-3.69346	0.000630888	0.00194957	-0.687529
KCNJ3	-2.53334	-2.04119	-3.56625	0.000917597	0.00269464	-0.691957
GJB3	2.6182	2.21614	3.67533	0.000665712	0.00204216	-0.707711
CD8A	1.76586	1.39677	3.65073	0.000715926	0.00217582	-0.718512
KRT16P1	1.66684	-3.21406	3.54864	0.000966001	0.00282055	-0.72784
BORCS7-ASMT	-2.26497	0.0552173	-3.5782	0.000886061	0.00261595	-0.729492
ATP12A	3.32682	1.78132	3.64118	0.000736386	0.00222784	-0.742306
KRT16P4	1.75419	-2.0479	3.5505	0.000960774	0.00280651	-0.74247
ALOX12	1.94573	0.229923	3.58876	0.000859064	0.00254714	-0.743134
SLC1A6	2.36015	-0.691538	3.56998	0.000907629	0.00266936	-0.747573
TRANK1	1.95438	1.76726	3.63838	0.000742479	0.00224241	-0.748607
NXPH4	1.60014	1.70007	3.63856	0.000742081	0.00224156	-0.755991
DSG1	2.97546	7.36283	3.88941	0.000350716	0.0011827	-0.768016
SLC7A3	-1.78771	-3.27701	-3.53241	0.00101279	0.00293626	-0.768325
KRT23	2.65999	3.22318	3.69538	0.000627317	0.0019401	-0.777635
CRB3	1.81961	0.199796	3.57337	0.000898677	0.00264874	-0.783831
POU3F2	1.78185	-0.00990015	3.56366	0.000924564	0.00271345	-0.785049
CXCL13	2.59516	-0.798206	3.55084	0.000959837	0.00280419	-0.787501
SYT14	1.70974	2.55137	3.64561	0.000726816	0.00220337	-0.79201
FAM72D	1.99929	-1.08041	3.53794	0.00099661	0.00289717	-0.792343
GRHL1	1.81044	4.63366	3.79009	0.000472988	0.0015258	-0.814706
MS4A1	2.16513	0.478561	3.57607	0.000891614	0.00262958	-0.818881
GPR174	1.51996	1.94649	3.6301	0.000760821	0.00229243	-0.820423
GZMA	1.57272	1.3518	3.60125	0.000828175	0.00246615	-0.854273
CXCL10	2.98646	1.58081	3.59002	0.000855913	0.00253935	-0.856207
ZIC2	1.80023	-1.59506	3.50589	0.00109396	0.00314189	-0.859213
LYPD6B	2.04534	0.217945	3.54041	0.000989452	0.00287939	-0.867352
CLEC12B	1.73026	1.92411	3.60838	0.000811005	0.00242436	-0.870776
SLC22A31	-1.73327	-1.26704	-3.50423	0.00109924	0.00315423	-0.874462
CNTN6	-1.7141	-1.22238	-3.48957	0.00114696	0.00327511	-0.913314
LHFPL4	-1.56452	-3.08411	-3.47147	0.00120862	0.00342888	-0.920363
SHISA3	-1.64173	-2.6887	-3.46777	0.00122161	0.00346016	-0.934213
MEA1	1.66633	-0.0167564	3.49832	0.00111824	0.00320306	-0.934291
CA9	1.58245	-1.41316	3.47952	0.00118079	0.00335437	-0.93913
DSC3	2.5067	6.79422	3.82276	0.000428801	0.00140651	-0.93932
TMEM171	1.94874	1.92541	3.55932	0.000936358	0.00274431	-0.950012
CDC6	1.95552	-1.34096	3.46597	0.00122796	0.00347388	-0.956152
BUB1B-PAK6	1.5514	2.39639	3.57606	0.000891631	0.00262958	-0.982651
LRRIQ1	-1.70632	1.05275	-3.51734	0.00105817	0.00305043	-0.984632
GJA3	1.7745	0.212678	3.48488	0.00116264	0.00331206	-0.998531
C1orf106	2.22316	2.67101	3.59339	0.000847485	0.00251628	-1.02165
ANGPTL7	-2.09879	3.62502	-3.64306	0.000732306	0.00221792	-1.02575
AC004754.1	-1.56782	-2.49055	-3.43166	0.00135558	0.00378195	-1.02858
LGALS7B	2.9476	4.63249	3.70847	0.000603407	0.00188028	-1.03299
BMS1P13	-1.56879	-3.92459	-3.42232	0.00139242	0.00387022	-1.04162
BCL2L10	1.61839	-1.26896	3.43472	0.00134367	0.00375253	-1.06214
POF1B	3.07512	3.90098	3.62611	0.000769809	0.00231518	-1.06255
CXCR3	1.58449	1.70405	3.53307	0.00101084	0.00293105	-1.06699
CYP19A1	-1.56609	-0.275013	-3.45389	0.00127151	0.00357893	-1.06941
FAM196B	-1.60771	0.523079	-3.45992	0.00124959	0.00352699	-1.09515
S100P	1.59691	-0.846657	3.42301	0.00138966	0.00386366	-1.119
SEMA3E	-1.81622	-2.81429	-3.39145	0.00152123	0.00417362	-1.1208
ESRP1	2.01391	4.18096	3.64059	0.000737666	0.00223103	-1.12128
CD1B	1.5466	0.292398	3.45616	0.00126321	0.00355972	-1.12702
BEX1	-1.70437	-1.98482	-3.38885	0.0015326	0.00419764	-1.14173
SH3RF2	2.12038	4.57524	3.65711	0.000702566	0.00214094	-1.15218
KRT14	2.18454	8.41835	3.76375	0.000511777	0.00162596	-1.16256
FAM25BP	2.20319	-0.735191	3.40458	0.00146513	0.00404844	-1.16707
PRSS22	2.04986	0.127831	3.42985	0.00136262	0.00379941	-1.17213
AADACL2	3.05362	1.99541	3.4951	0.00112872	0.00323114	-1.1767
ANO5	-2.01248	2.33976	-3.49968	0.00111385	0.00319096	-1.18013
SERPINA9	1.90724	-1.83286	3.3816	0.00156464	0.00427269	-1.18617
FAM72C	1.80877	-0.866412	3.38417	0.00155321	0.00424447	-1.18766
TUBBP5	1.62659	-0.983113	3.38534	0.00154802	0.00423268	-1.19483
AIM2	1.53296	0.887438	3.4378	0.00133185	0.00372501	-1.20133
CTLA4	1.88894	-0.384807	3.40361	0.00146918	0.0040573	-1.20183
C5orf46	2.58728	0.648348	3.42661	0.00137537	0.00382934	-1.20984
CRISP3	1.52501	-3.51894	3.35296	0.00169774	0.00457921	-1.21125
FDCSP	2.94779	-1.29902	3.37131	0.00161131	0.00438094	-1.21871
IFNG	1.8641	-2.10814	3.35872	0.00167017	0.00451317	-1.2271
EGR3	1.52332	4.55865	3.62365	0.000775412	0.00232985	-1.23822
TP63	2.18846	5.78884	3.69182	0.00063397	0.00195721	-1.24118
TMEM125	1.60042	-1.65547	3.35721	0.00167733	0.00453111	-1.24526
XDH	1.91968	0.445239	3.41073	0.0014395	0.00398387	-1.25039
MYZAP	1.80222	-0.0242483	3.37983	0.00157258	0.00429132	-1.26025
IL22RA1	1.84158	2.9576	3.52475	0.00103561	0.00299213	-1.26286
ATP10B	2.40115	3.67716	3.53511	0.00100487	0.00291591	-1.27331
CERS3	2.79209	3.19027	3.52501	0.00103485	0.00299079	-1.27378
HS6ST3	-1.50731	-3.11915	-3.32362	0.00184526	0.00492282	-1.28669
OR5P2	2.28643	-0.824573	3.35522	0.00168689	0.00455368	-1.2959
AL645941.2	1.91821	0.627644	3.37009	0.00161691	0.00439492	-1.30329
IL12B	1.51358	-3.23605	3.31549	0.00188822	0.00502079	-1.30685
PLA2G4E	3.17753	2.585	3.48233	0.00117126	0.0033317	-1.3108
TMEM184A	2.5027	1.66178	3.42741	0.00137221	0.00382283	-1.32186
AC138866.2	-2.20777	-2.10207	-3.31332	0.00189989	0.00504823	-1.32315
CLEC6A	1.5705	-3.16278	3.30472	0.00194664	0.00515272	-1.33332
CBSL	-2.04124	0.728196	-3.35568	0.00168465	0.00454835	-1.33998
DAB1	-1.67093	-0.0317977	-3.33728	0.00177512	0.00476333	-1.3536
GJB6	1.66457	-3.35857	3.29397	0.00200666	0.00529129	-1.35864
SLC46A2	1.63264	1.4182	3.39654	0.00149924	0.00412498	-1.37391
CA12	1.77465	4.0493	3.55123	0.00095874	0.00280183	-1.37862
AC005324.4	-1.72604	0.312046	-3.32734	0.00182594	0.00488002	-1.38212
AC093616.1	2.49935	-1.82737	3.29398	0.00200662	0.00529129	-1.3862
KRT31	2.36957	-0.282634	3.32458	0.00184027	0.00491154	-1.39997
NKG7	1.64225	1.55459	3.39788	0.0014935	0.00411097	-1.40649
PIWIL1	-2.67818	0.883851	-3.35871	0.00167022	0.00451317	-1.4203
AC005351.1	1.66283	-2.03161	3.27401	0.00212279	0.00555206	-1.43448
DSP	2.02959	9.75897	3.67164	0.000673021	0.00206261	-1.43698
PCSK1N	-1.70762	1.02579	-3.35134	0.00170561	0.0045953	-1.43848
AL355802.4	-1.52463	-2.51561	-3.25904	0.00221404	0.00576497	-1.44575
PNPLA1	2.21047	1.27913	3.36678	0.00163223	0.00443097	-1.44606
OCA2	2.10903	3.53735	3.46734	0.00122312	0.00346292	-1.44831
FOXN1	2.53499	1.58195	3.38111	0.00156683	0.00427747	-1.45206
BMP5	-1.67772	-3.40116	-3.25157	0.00226094	0.00586182	-1.45542
RASAL1	1.82449	1.90456	3.3976	0.00149471	0.00411369	-1.4572
ZIM2	-1.58839	-1.06858	-3.2683	0.00215717	0.00563208	-1.46501
OVOL1	1.97511	1.51452	3.3649	0.00164103	0.00445172	-1.48571
EYA4	1.87778	1.18999	3.33342	0.00179469	0.00480783	-1.49301
ACTG2	-2.37262	0.777811	-3.32027	0.00186285	0.00496289	-1.49449
FERMT1	1.83445	2.85597	3.43102	0.00135804	0.00378719	-1.49943
PRR15L	-1.5972	-3.29708	-3.23346	0.00237859	0.0061184	-1.49967
AADAC	2.28779	-0.814002	3.2706	0.00214325	0.00559876	-1.50025
SLC26A3	-1.99271	-3.74609	-3.23145	0.00239199	0.00614879	-1.50295
TMEM56	-2.3661	0.136255	-3.29361	0.0020087	0.00529524	-1.51334
GSDMA	2.41571	3.00186	3.43762	0.00133252	0.00372624	-1.51405
AC244230.1	1.8313	-1.77557	3.24633	0.00229442	0.0059368	-1.51935
LCE5A	2.60804	-0.698973	3.25244	0.00225541	0.0058514	-1.54537
LCN2	2.7672	0.48628	3.27365	0.00212492	0.00555612	-1.58295
TLR9	2.1574	-1.35168	3.2121	0.00252481	0.00643288	-1.60551
PLA2G2D	1.98036	-2.12815	3.19905	0.00261835	0.00662924	-1.62071
CD5L	1.62981	-2.38979	3.18743	0.00270434	0.0068077	-1.63101
ANO3	-2.23944	0.13061	-3.22661	0.0024246	0.00622102	-1.63472
IGFL4	1.59554	-1.01663	3.19965	0.00261398	0.00661903	-1.66963
PLA1A	1.56866	3.58099	3.42046	0.00139989	0.00388875	-1.67666
CTSV	1.95474	2.901	3.36251	0.00165225	0.00447398	-1.68031
SDHDP6	-1.61539	-1.04533	-3.19131	0.00267534	0.00674877	-1.68134
BBOX1	1.6585	1.89778	3.29983	0.00197374	0.00521376	-1.68401
NCMAP	-1.58462	-3.45427	-3.1539	0.00296772	0.0073756	-1.68685
EMILIN3	-1.68695	0.864453	-3.24005	0.00233511	0.00602582	-1.70683
RNF39	1.93402	0.20521	3.22444	0.00243936	0.0062531	-1.71551
ZNF804B	-1.5871	-1.57992	-3.16374	0.00288804	0.00720352	-1.71622
PVRIG	1.89648	0.563573	3.23759	0.00235127	0.00605863	-1.71695
ARSF	1.94816	-0.942622	3.18373	0.00273225	0.0068678	-1.72381
ADAMTS19	-2.54837	-0.0697209	-3.18359	0.00273334	0.0068678	-1.72478
CBLC	2.38102	-0.584078	3.17777	0.00277787	0.00696647	-1.73092
BARX2	1.78601	2.39075	3.30909	0.00192277	0.00509861	-1.74388
CKMT1A	2.26588	2.68612	3.32153	0.00185623	0.00494866	-1.74449
SLC25A18	-1.8521	-2.72917	-3.13434	0.00313243	0.0077352	-1.75182
ACER1	2.51302	1.09831	3.24726	0.00228843	0.00592409	-1.75649
LRRTM4	-3.62626	1.86936	-3.23779	0.00234994	0.00605599	-1.77116
WDR64	-1.63859	0.17694	-3.17562	0.00279451	0.00699579	-1.79057
DLGAP1	1.60476	2.00859	3.25656	0.00222947	0.00579813	-1.79541
CD164L2	1.64966	-0.288428	3.17069	0.00283295	0.00708165	-1.7996
GRB7	1.91869	1.74846	3.25438	0.00224319	0.00582596	-1.80027
RBBP8NL	1.79264	-0.691793	3.15077	0.00299354	0.00743307	-1.81506
IYD	-1.57708	-3.60045	-3.09698	0.00347118	0.00846035	-1.82329
WNT7B	1.7021	0.0493667	3.1624	0.00289876	0.00722745	-1.83717
UGT1A6	2.29104	0.662621	3.17812	0.00277521	0.00696072	-1.85951
SPATS1	1.80993	-2.07057	3.0882	0.00355567	0.0086423	-1.87804
KLHDC8A	-1.63303	-1.64372	-3.09636	0.00347703	0.00847354	-1.88233
UGT1A5	2.09877	-0.45931	3.1224	0.00323713	0.00795917	-1.89287
SCGB1D2	-1.90199	-3.56271	-3.04536	0.00399638	0.00955754	-1.9382
OTOA	1.69282	-0.647113	3.08895	0.00354831	0.00862766	-1.95102
SCEL	2.82865	3.77391	3.29739	0.00198739	0.00524622	-1.98501
CLDN4	1.62893	1.54102	3.16627	0.00286787	0.00715759	-1.99397
MT3	-1.55958	-3.21822	-3.01594	0.00432818	0.0102404	-2.01079
IQCJ	-2.03129	-3.09503	-3.01039	0.00439369	0.0103738	-2.0294
DEGS2	1.71697	1.91615	3.16875	0.00284821	0.00711611	-2.04124
KLC3	1.63507	2.38667	3.19653	0.00263679	0.00667156	-2.04196
CYP4F22	2.46405	2.30154	3.19327	0.00266083	0.00672358	-2.04788
ADIPOQ	-2.16861	-3.58022	-2.99109	0.00462854	0.0108461	-2.05866
APOB	1.66634	0.840657	3.09569	0.00348348	0.00848604	-2.07115
SIM2	1.96544	-0.694414	3.0506	0.00393981	0.00944644	-2.07125
SDR42E1	1.53977	2.32248	3.18162	0.00274837	0.00690148	-2.07312
SLC47A2	1.99776	0.448216	3.06876	0.00374966	0.00904778	-2.10157
ESRP2	1.97291	3.2324	3.22648	0.00242547	0.00622243	-2.11893
UGT1A1	1.93233	-0.767505	3.01949	0.00428688	0.0101564	-2.12235
LIPK	2.52475	0.480433	3.06482	0.00379019	0.00912848	-2.13699
EFNA3	1.64904	0.24526	3.05125	0.00393281	0.00943082	-2.14178
PLIN4	-2.28353	1.68598	-3.10712	0.00337599	0.00826691	-2.15942
THRSP	-3.07385	-1.48057	-2.97793	0.00479526	0.0111731	-2.17576
FGF13	-1.50079	0.919735	-3.04904	0.00395653	0.00948065	-2.17777
BLK	1.58235	-1.10236	2.99014	0.00464035	0.0108686	-2.18023
DAPL1	1.77194	1.80431	3.09838	0.00345787	0.00843536	-2.20526
NDST3	1.55934	-0.706533	2.98974	0.00464531	0.0108775	-2.20772
AC134669.2	1.79431	1.32951	3.04729	0.00397544	0.00951987	-2.21704
PROM2	1.61239	4.15203	3.25318	0.00225071	0.00584165	-2.23344
BNIPL	2.54263	2.39878	3.11623	0.0032925	0.00808398	-2.23864
USP6	-2.0466	2.4462	-3.11523	0.0033016	0.00810323	-2.2439
TRIM29	2.07689	6.33447	3.34301	0.00174646	0.00469423	-2.25865
SLC15A1	2.91971	2.54318	3.12441	0.00321926	0.00792227	-2.26168
CALML3	3.06637	4.26886	3.25238	0.00225581	0.00585147	-2.26348
PLA2G4F	2.70144	3.25025	3.15455	0.00296245	0.00736439	-2.26687
GJA9	2.05255	-1.93792	2.92131	0.00557939	0.0127526	-2.28369
SH2D1A	1.72517	-0.820401	2.9544	0.00510775	0.0118002	-2.28803
SPRR4	2.99461	0.236987	2.97973	0.00477218	0.0111274	-2.28955
CHP2	2.31579	-0.163026	2.97227	0.00486885	0.0113214	-2.29448
AL732437.1	1.87295	0.173975	2.99391	0.00459344	0.0107744	-2.30096
SOX21	1.75441	-0.0409243	2.97615	0.00481835	0.0112202	-2.30101
CCL27	2.29599	-0.264635	2.95795	0.00505939	0.0117053	-2.3104
MUC15	2.40574	2.13896	3.07259	0.00371064	0.00896931	-2.31201
CARD18	2.23662	-0.129035	2.96116	0.00501607	0.0116176	-2.33558
C1QL3	-1.65168	-2.13584	-2.88123	0.00620527	0.0140092	-2.33946
PCK1	-1.56761	-2.52847	-2.87481	0.00631137	0.0142155	-2.35552
COL17A1	2.71282	4.36276	3.18357	0.00273354	0.0068678	-2.35898
ACE2	1.65911	-2.10355	2.87162	0.0063648	0.0143241	-2.3925
TRIM48	3.07516	-1.70829	2.87052	0.00638325	0.0143556	-2.40411
MUSTN1	-1.9646	-2.25896	-2.85626	0.0066276	0.0148224	-2.40617
UGT1A4	1.93704	-0.166683	2.91571	0.0056632	0.0129136	-2.42059
PRSS8	2.00644	2.12784	3.03171	0.00414725	0.00987156	-2.42535
MOGAT2	-2.29969	-2.42391	-2.85052	0.00672838	0.0150147	-2.43027
SENP3-EIF4A1	1.91552	-0.936336	2.86627	0.00645511	0.0144935	-2.43857
AC020909.1	2.02404	-1.3674	2.87088	0.0063772	0.0143448	-2.43952
AC078927.1	2.10569	0.131252	2.89856	0.00592697	0.0134453	-2.44888
TNS4	1.86364	4.95962	3.19732	0.00263095	0.00665852	-2.49033
AC011498.5	-1.79945	-2.21721	-2.82173	0.00725587	0.0160473	-2.50815
MUC21	-1.55633	-3.34937	-2.79642	0.00775098	0.0169771	-2.50822
ATP1A3	1.60737	-0.337823	2.8639	0.00649557	0.0145692	-2.50831
AP1M2	1.92488	1.25884	2.93908	0.00532136	0.0122381	-2.53153
GALNTL6	-2.02322	-0.545548	-2.83519	0.00700465	0.0155558	-2.5449
KRT5	2.09452	8.46078	3.26439	0.00218098	0.00568579	-2.54588
ALDH3B2	2.31215	3.743	3.10559	0.00339017	0.00829638	-2.555
PAX6	1.5724	-1.8369	2.8035	0.00760949	0.0167013	-2.55839
CDHR1	2.57043	5.22496	3.17511	0.00279846	0.00700448	-2.559
NIPAL1	1.53436	2.18179	2.9676	0.00493023	0.0114394	-2.59069
TECTB	-1.79316	-2.99896	-2.75994	0.00852012	0.0184175	-2.59165
SNORD10	-1.79602	-2.74839	-2.77109	0.00827799	0.0179504	-2.60987
ADORA2A	1.56202	-3.42835	2.75124	0.00871366	0.0187813	-2.61289
GDPD2	2.31713	-0.54727	2.80865	0.00750809	0.0165069	-2.63547
IRX4	1.60048	1.32046	2.87119	0.00637202	0.014338	-2.68587
DPP6	1.81334	0.729703	2.80445	0.00759066	0.0166656	-2.73454
AC245033.1	-2.08812	0.240113	-2.77577	0.00817815	0.0177837	-2.7544
MIR205HG	2.09363	3.71811	3.01107	0.00438561	0.010356	-2.76071
TNXA	-1.67266	-2.32628	-2.69273	0.0101251	0.0213962	-2.77932
LGALS7	2.44929	2.01872	2.86563	0.00646608	0.0145101	-2.83142
WISP3	1.50169	-1.30141	2.69127	0.0101626	0.0214615	-2.85095
PRSS56	1.54928	-2.5152	2.64157	0.0115286	0.0239611	-2.88192
UGT1A10	1.55096	-2.66236	2.62157	0.0121244	0.0250647	-2.91316
AC010531.1	-1.52616	-3.42082	-2.5991	0.0128275	0.0263154	-2.91673
ATP13A5	-1.654	-1.17267	-2.6549	0.0111465	0.0232721	-2.92168
RBFOX1	-1.63806	-1.97976	-2.63525	0.0117138	0.0243017	-2.92336
TRIM55	-1.76193	-2.62961	-2.61408	0.0123547	0.0254808	-2.94554
AC011511.4	3.07247	0.289809	2.66545	0.0108526	0.0227101	-2.96644
AMIGO3	-2.3042	-2.94658	-2.57233	0.0137135	0.0279061	-2.97848
PNLDC1	-1.78655	-1.48884	-2.62219	0.0121054	0.0250281	-2.97969
TGM5	1.69882	1.9732	2.78695	0.00794435	0.0173417	-3.00113
DCANP1	1.93044	-1.83028	2.58755	0.0132029	0.0269854	-3.00149
AC113189.2	1.57827	-1.35831	2.60568	0.0126176	0.0259373	-3.02224
UGT1A2P	1.70304	-1.7618	2.59798	0.0128633	0.0263805	-3.02538
ESPN	1.73788	1.7758	2.74465	0.00886311	0.0190587	-3.0805
AL049844.3	-1.56864	-3.14123	-2.52188	0.0155375	0.0311669	-3.09715
HMGA2	1.52365	1.54358	2.67561	0.010576	0.0222058	-3.09868
FETUB	1.76933	-0.758279	2.59973	0.0128072	0.0262794	-3.11285
CD207	1.60033	1.43285	2.70736	0.00975363	0.0207291	-3.11713
BX088645.1	1.71767	1.57715	2.71038	0.00967855	0.02059	-3.12123
AL139260.3	1.5377	-2.26864	2.5305	0.015211	0.0305691	-3.12734
CST6	2.35293	2.7143	2.7727	0.00824352	0.0178957	-3.13125
MOGAT1	-2.04762	-2.17319	-2.53146	0.0151748	0.0305059	-3.13269
C3orf36	1.51689	-3.2637	2.49076	0.01677	0.0333264	-3.15681
AWAT1	-2.45183	-2.86755	-2.49546	0.0165781	0.0329906	-3.17716
LIPH	1.57347	0.435593	2.60741	0.0125632	0.0258501	-3.18711
AC139426.1	1.67872	-1.35395	2.53255	0.0151339	0.0304396	-3.19273
MAGEC2	1.55199	-3.43334	2.46949	0.0176629	0.0348549	-3.19338
KRT2	4.93182	3.00237	2.68072	0.0104396	0.0219647	-3.20054
GATA3	1.69801	3.21695	2.77198	0.00825877	0.0179187	-3.20782
KRT75	1.74918	0.00889478	2.58904	0.013154	0.0269019	-3.20968
DGAT2L6	-2.77764	-2.083	-2.47882	0.0172661	0.0341871	-3.26544
CKMT1B	1.60841	3.40314	2.77311	0.00823475	0.0178796	-3.30046
GPD1	-1.63251	-0.29963	-2.50896	0.0160387	0.0320526	-3.33345
KRT73	1.66629	-0.77599	2.4308	0.0193983	0.0377247	-3.43254
COCH	-1.81923	0.779355	-2.4588	0.0181278	0.0356088	-3.52026
FGFR3	1.87622	4.41387	2.74442	0.00886843	0.0190658	-3.5367
AWAT2	-2.77265	-1.8736	-2.30569	0.0261161	0.0486401	-3.64093
FADS2	-1.59125	5.49718	-2.75876	0.00854614	0.0184655	-3.67856
POU2F3	1.87997	1.97195	2.49086	0.0167657	0.0333227	-3.70401
BBS10	-1.90132	1.53484	-2.37598	0.0221223	0.0422025	-3.735
PM20D1	-2.44691	0.232174	-2.34203	0.023977	0.0451964	-3.7495
SGPP2	1.53815	2.77291	2.48126	0.0171636	0.0340187	-3.8671
ANKRD20A4	-1.50634	3.47242	-2.46405	0.0178979	0.0352248	-3.88645
GRHL2	1.53293	2.74126	2.293	0.0269027	0.049884	-4.24343
