# Supplementary material for: Shared Gene Expression and Immune Pathway Changes Associated with Progression from Nevi to Melanoma
Source: Cancers (Basel). 2021 Dec 21;14(1):3. doi: 10.3390/cancers14010003 (PMC8749980; doi:10.3390/cancers14010003)
Supplement: Supplementary file 1 [file cancers-14-00003-s001.zip › Supplementary_TableS4_Krueger_multinomial.xlsx]

## Sheet: TableS4_Krueger_multinomial
	BN	DN	CMM
Intercept	-16.7274	38.7571	-22.0297
					* Coefficients in columns B-D are used for the multinomial regressions to determine the probability that a lesion is a BN, DN, or CMM respectively. Positive values increase the probability of falling into that category.
	Coefficients*
	BN	DN	CMM
ABHD10	0.13833	-0.0774056	-0.0609248
AQP8	0.152077	-0.614105	0.462028
AS3MT	0.114014	0.136745	-0.250759
C14orf37	-0.00469308	0.00911196	-0.00441888
C1QA	-0.147376	-0.095484	0.24286
CDKN2C	-0.150384	-0.343474	0.493858
CDR2L	-0.00422934	-0.00924792	0.0134773
CYTOR	-0.503796	-0.589053	1.09285
DPEP3	0.0091465	-0.217433	0.208287
ELF2	0.128286	0.240093	-0.368379
FAF1	0.857385	-0.707975	-0.149411
FAM193B	0.589636	0.593989	-1.18362
INAFM2	-0.487168	-0.368315	0.855483
INIP	0.114856	-0.0866285	-0.0282277
IQGAP1	-0.141575	0.199806	-0.0582313
LINC00260	-0.3471	0.857329	-0.510229
LIPE-AS1	0.0902009	-0.774572	0.684371
LOC100506473	1.13684	-0.965845	-0.170994
LOC648987	0.19998	-0.968595	0.768614
MST1R	0.00547342	0.108638	-0.114112
NUDT9	0.309551	-0.520719	0.211168
PCGF2	0.112158	-0.447135	0.334977
PLEC	-0.0150656	0.0363624	-0.0212969
PLEKHF1	-0.0805313	0.0365996	0.0439317
SNORD54	0.518114	-0.135669	-0.382445
SNX9	-0.545362	-0.25861	0.803972
SPATC1	2.77318	-2.64726	-0.125912
SYNE2	-0.042131	0.169444	-0.127313
TLR6	-0.206955	-0.398094	0.605049
TMEM254-AS1	0.0159119	0.0126846	-0.0285965
ZSWIM3	-1.3718	1.01698	0.354819
