# Supplementary material for: Shared Gene Expression and Immune Pathway Changes Associated with Progression from Nevi to Melanoma
Source: Cancers (Basel). 2021 Dec 21;14(1):3. doi: 10.3390/cancers14010003 (PMC8749980; doi:10.3390/cancers14010003)
Supplement: Supplementary file 1 [file cancers-14-00003-s001.zip › Supplementary_TableS5_Scatolini_multinomial.xlsx]

## Sheet: TableS5_Scatolini_multinomial
	BN	DN	RGM	VGM
Intercept	1.32164	0.115731	-0.62089	-0.816477
						* Coefficients in columns B-E are used for the multinomial regressions to determine the probability that a lesion is a BN, DN, RGM, and VGM respectively. Positive values increase the probability of falling into that category.
	Coefficients*
	BN	DN	RGM	VGM
ARVCF	0.00429178	0.0134053	0.0127929	-0.0304899
CCL18	-0.0529955	0.0348346	-0.0299121	0.048073
CCL20	-0.0538273	0.043401	-0.00922087	0.0196472
CDK6	0.258061	-0.210935	-0.159925	0.1128
CDKL2	-0.110478	0.146666	0.0922426	-0.128431
CORIN	-0.0446446	0.190926	-0.0212144	-0.125067
DLG3	0.180359	-0.136283	0.287454	-0.33153
ECHDC3	0.0969517	-0.0265426	0.0887839	-0.159193
ELOVL5	-0.0245529	0.026295	-0.0210658	0.0193237
EZR	-0.00158178	0.000758664	0.00488379	-0.00406067
FAM168A	0.0178093	0.0418626	-0.0666332	0.00696126
GDF15	-0.000221825	-4.33e-06	6.04e-05	0.000165769
GLA	-0.561175	-0.670582	0.645286	0.586471
GLRA3	0.0049201	-0.00775448	0.00264454	0.000189834
HCN1	0.0648817	-0.0856926	0.00283894	0.017972
IFIT2	-0.0608721	0.06291	0.01745	-0.0194879
IGF2R	-0.00429031	0.0169964	-0.0134535	0.000747392
IGFBP5	-0.00952855	0.0947405	-0.0129257	-0.0722862
ISL1	-0.00518741	0.000505813	0.0436508	-0.0389692
LETMD1	0.0237659	-0.00323013	-0.0223847	0.00184892
LOC101928185	-0.0193943	0.0372643	0.0523371	-0.070207
NFATC2	0.00704417	0.00634198	-0.0575131	0.044127
PALMD	-0.120879	0.180017	0.105045	-0.164183
PNCK	0.311445	0.166674	-0.414158	-0.0639608
PPAT	-0.15006	0.197856	-0.0952541	0.0474579
PTPN21	0.249	-0.0114389	0.115094	-0.352655
RPL30	0.347955	0.203327	-0.285915	-0.265367
SRC	0.162438	-0.0693998	0.0565465	-0.149585
STK24-AS1	-0.00289023	-0.0434488	0.0657978	-0.0194588
TMEM176A	-0.0138754	-0.00187797	-0.000929222	0.0166826
TPRX1	-0.0122359	-0.187107	0.284959	-0.0856164
TUBA1B	0.925224	-0.225782	-0.272065	-0.427378
VHLL	0.00629717	-0.00805471	0.000669269	0.00108828
YWHAB	-0.243858	-0.100114	0.0256546	0.318318
ZBED6CL	0.0109988	-0.00708636	0.0187605	-0.0226729
ZNF259P1	-0.13328	0.00416286	-0.0253952	0.154512
