# Supplementary material for: Shared Gene Expression and Immune Pathway Changes Associated with Progression from Nevi to Melanoma
Source: Cancers (Basel). 2021 Dec 21;14(1):3. doi: 10.3390/cancers14010003 (PMC8749980; doi:10.3390/cancers14010003)
Supplement: Supplementary file 1 [file cancers-14-00003-s001.zip › Supplementary_TableS6_Krueger_binomial.xlsx]

## Sheet: TableS6_Krueger_binomial
Intercept	-34.7517
			* Positive coefficients indicate genes higher in CMM
Gene	Coefficients*		*Negative coefficients indicate gens higher in DN
ABCA5	-1.01693
AS3MT	-0.306026
C17orf58	0.593237
CDKN2C	2.82301
CDR2L	0.0785099
CYTOR	0.0975245
FAM193B	-1.34232
FAM207A	2.42676
INAFM2	0.725512
LINC00937	-0.182671
LIPE-AS1	0.352226
LOC648987	3.6387
RCE1	0.354564
SLC25A33	0.341947
SP1	-1.10784
SYNE2	-2.61244
