# Supplementary material for: Shared Gene Expression and Immune Pathway Changes Associated with Progression from Nevi to Melanoma
Source: Cancers (Basel). 2021 Dec 21;14(1):3. doi: 10.3390/cancers14010003 (PMC8749980; doi:10.3390/cancers14010003)
Supplement: Supplementary file 1 [file cancers-14-00003-s001.zip › Supplementary_TableS7_Scatolini_binomial.xlsx]

## Sheet: TableS7_Scatolini_binomial
Intercept	0.484519
			* Positive coefficients indicate genes higher in CMM
Gene	Coefficients*		*Negative coefficients indicate gens higher in PN
ALDH3A2	-0.815328
ARVCF	-0.12279
CCDC102B	3.87418
CNBD2	0.653284
CORIN	-0.254875
CYP4F12	-0.280465
DDX43	-0.0498367
GLA	0.42842
IGFBP5	-0.446483
MS4A7	0.769584
PALMD	-0.000408786
PRSS23	0.0572733
RPL30	-2.61274
RPS27L	0.57937
SMARCA2	-2.24622
SORD	-0.766044
SS18L2	0.562474
ZCCHC7	-0.0934623
