# Supplementary material for: Shared Gene Expression and Immune Pathway Changes Associated with Progression from Nevi to Melanoma
Source: Cancers (Basel). 2021 Dec 21;14(1):3. doi: 10.3390/cancers14010003 (PMC8749980; doi:10.3390/cancers14010003)
Supplement: Supplementary file 1 [file cancers-14-00003-s001.zip › Supplementary_TableS8_Bastian_binomial.xlsx]

## Sheet: TableS8_Bastian_binomial
Intercept	6.40676
			* Positive coefficients indicate genes higher in CMM
Gene	Coefficients*		*Negative coefficients indicate gens higher in PN
ASB11	-0.0267609
CDPF1	-0.158741
CYBRD1	-1.27271
DNAJC9-AS1	-0.0503651
GTF3A	0.395543
MIPOL1	-0.562846
MMP13	0.14007
MNX1	0.21675
NAP1L3	-0.11537
NFIX	-0.0402224
OAS2	0.289819
PCDHGA2	-0.0953624
SCN1B	-0.514307
SEC16B	-0.714778
SLC24A4	0.0333282
TEX30	0.317095
TMEM163	0.147263
TREM2	0.136539
VIM	-0.0493944
ZC3H13	0.557122
