# Supplementary material for: Shared Gene Expression and Immune Pathway Changes Associated with Progression from Nevi to Melanoma
Source: Cancers (Basel). 2021 Dec 21;14(1):3. doi: 10.3390/cancers14010003 (PMC8749980; doi:10.3390/cancers14010003)
Supplement: Supplementary file 1 [file cancers-14-00003-s001.zip › Supplementary_TableS9_All_genes_pathway_analysis.xlsx]

## Sheet: Sheet1
Top 10 for Bastian
TMEM47
ZNF214
CTSB
PYGL
TNS1
ABCA10
ABCA8
IL11RA
BRCA2
KPNA2
Top 10 for Krueger
IGFBP4
WIPI1
CPXM1
CCL8
C1QA
C3AR1
DFNA5
CCL3L3
AS3MT
CYP39A1
Top 10 for Scatolini
HLF
CTNNBIP1
LRP4
EMX2OS
CYP4B1
STAR
ARMC9
DFNA5
FCGR1B
FCGR3A
Binomial for Bastian
ASB11
CDPF1
CYBRD1
DNAJC9-AS1
GTF3A
MIPOL1
MMP13
MNX1
NAP1L3
NFIX
OAS2
PCDHGA2
SCN1B
SEC16B
SLC24A4
TEX30
TMEM163
TREM2
VIM
ZC3H13
Binomial for Krueger
ABCA5
AS3MT
C17orf58
CDKN2C
CDR2L
CYTOR
FAM193B
FAM207A
LNAFM2
LINC00937
LIPE-AS1
LOC648987
RCE1
SLC25A33
SP1
SYNE2
Binomial for Scatolini
ALDH3A2
ARVCF
CCDC102B
CNBD2
CORIN
CYP4F12
Ddx43
GLA
IGFBP5
MS4A7
PALMD
PRSS23
RPL30
RPS27L
SMARCA2
SORD
SS18L2
ZCCHC7
Bastian vs Krueger Overlap
AS3MT
C1QB
CHIT1
CLDN8
CXCL10
CXCL9
DFNA5
FCGR1B
GZMB
PRAME
RNF182
SCG2
SCGB1D2
Bastian vs Scatolini Overlap
AIM2
ATP13A5
C1QB
CXCL10
CXCL8
CXCL9
CYP4B1
DACT2
DFNA5
ENTHD1
FCGR1B
FCGR3A
FDCSP
GBP5
GDF15
KLRD1
MMP3
NPY1R
OGN
PRAME
RGS1
S100A7
S100A8
S100A9
SCGB1D2
SPP1
Krueger vs Scatolini Overlap
C1QB
CCL27
CHP2
CXCL10
CXCL9
DFNA5
FCGR1B
GATA3
PRAME
SCGB1D2
